# Supplementary material for: Poly(ethylene glycol) dimethyl ether mediated oxidative scission of aromatic olefins to carbonyl compounds by molecular oxygen
Source: Royal Society of Chemistry journal article supplement (doi:10.1039/d1ra02007b), 2021-01-01

Supporting Information for

## **Poly(ethylene glycol) dimethyl ether mediated oxidative scission of aromatic olefins to carbonyl compounds by molecular oxygen**

Tao Yu<sup>§</sup>, Mingqing Guo<sup>§</sup>, Simiaomiao Wen, Rongrong Zhao, Jinlong Wang, Yanli Sun, Qixing Liu\* and Haifeng Zhou\*

Research Center of Green Pharmaceutical Technology and Process, Hubei Key Laboratory of Natural Products Research and Development, College of Biological and Pharmaceutical Sciences, China Three Gorges University, Yichang 443002, P. R. of China  
E-mail: qixingliu86@163.com; zhouhf@ctgu.edu.cn

<sup>§</sup> These authors contributed equally to this work.

|                                                                              |    |
|------------------------------------------------------------------------------|----|
| <b>1. General information</b> .....                                          | 2  |
| <b>2. General procedure for oxidative scission of aromatic olefine</b> ..... | 2  |
| <b>3. Gram-scale synthesis of 2a</b> .....                                   | 2  |
| <b>4. Synthesis of compound 3a</b> <sup>[2]</sup> .....                      | 3  |
| <b>5. Analytical data of the products</b> .....                              | 3  |
| <b>6. NMR spectra of the products</b> .....                                  | 10 |

## 1. General information

Unless otherwise noted, all reagents, catalysts and solvents were purchased from commercial suppliers and used without further purification. Column chromatography was performed with silica gel (200-300 mesh). NMR spectra were recorded on Bruker AVANCE III (400 MHz) spectrometers. CDCl<sub>3</sub> was the solvent used for the NMR analysis, with tetramethylsilane as the internal standard. Chemical shifts were reported upfield to TMS (0.00 ppm) for <sup>1</sup>H NMR and relative to CDCl<sub>3</sub> (77.0 ppm) for <sup>13</sup>C NMR. HPLC analysis was conducted on an Agilent 1200 Series instrument with 5C<sub>18</sub>-MS-II Packed Column (4.6 mm I.D. × 250 mm). The substrates were prepared according to reported method<sup>[1]</sup> or commercially available.

## 2. General procedure for oxidative scission of aromatic olefin

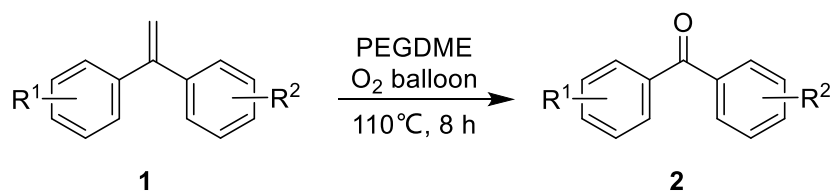

The corresponding aromatic olefin **1** (0.5 mmol), PEGDME (1 mL) were added to a 10 mL Schlenk tube. The tube was evacuated and filled with oxygen three times. The mixture was stirred at 110 °C for 8 hours under O<sub>2</sub> atmosphere using a balloon. After cooling, the mixture was subjected to silica gel column chromatography (PE: EA = 15:1) to give the product **2**.

## 3. Gram-scale synthesis of 2a

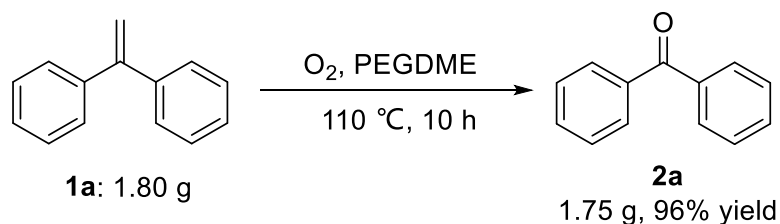

The *gem*-diphenylethylene (**1a**, 1.80 g, 10 mmol), PEGDME (20 mL) were added to a 50 mL of round-bottomed flask equipped with a three-way jointer. The flask was then evacuated and filled with oxygen three times. The mixture was stirred at 110 °C for 10 hours under O<sub>2</sub> atmosphere using a balloon. After cooling, the mixture was subjected to silica gel column chromatography (PE: EA = 15:1) to give the product **2a** (1.75 g, 96% yield).

#### 4. Synthesis of compound **3a** <sup>[2]</sup>

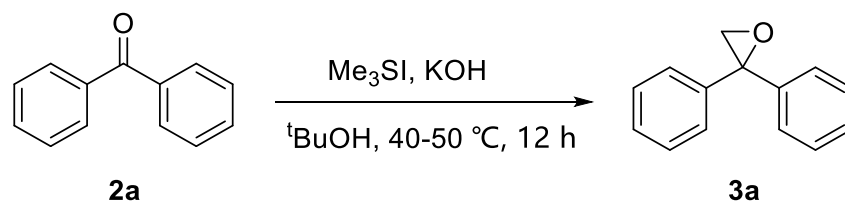

To a stirred solution of benzophenone **2a** (0.91 g, 5 mmol) in tertiary butanol (6.2 mL) was added portionwise trimethylsulfonium iodide (2.04 g, 10 mmol) and crushed potassium hydroxide (1.7 g, 30 mmol) subsequently at 30 °C. The resulting mixture was heated to 40-50 °C and stirred for 12 h. After the reaction was complete, tertiary butanol was removed. The residue was dissolved in a mixture of water (10 mL) and dichloromethane (20 mL). After phase separation, aqueous phase was extracted with dichloromethane (2 × 5 mL). The combined organic phase was washed with water (2 × 10 mL), saturated brine (10 mL), and dried over Na<sub>2</sub>SO<sub>4</sub>. After removal of the solvent, **3a** was obtained, which was used for the subsequent oxidative scission directly.

#### 5. Analytical data of the products

Benzophenone (**2a**, CAS: 119-61-9<sup>[3]</sup>)

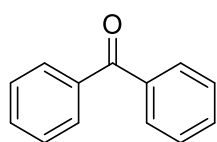

White solid; 99% yield (90.2 mg). <sup>1</sup>H NMR (400 MHz, CDCl<sub>3</sub>): δ = 7.86-7.84 (m, 4H), 7.66-7.62 (m, 2H), 7.55-7.51 (m, 4H); <sup>13</sup>C NMR (100 MHz, CDCl<sub>3</sub>): δ = 196.8, 137.6, 132.5, 130.1, 128.3.

2-Methylbenzophenone (**2b**, CAS: 131-58-8<sup>[3]</sup>)

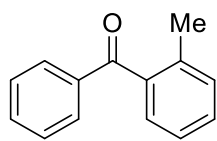

Colorless liquid; 98% yield (95.2 mg). <sup>1</sup>H NMR (400 MHz, CDCl<sub>3</sub>): δ = 7.86-7.84 (m, 2H), 7.65-7.61 (m, 1H), 7.52-7.42 (m, 3H), 7.37-7.28 (m, 3H), 2.38 (s, 3H); <sup>13</sup>C NMR (100 MHz, CDCl<sub>3</sub>): δ = 198.7, 138.6, 137.7, 136.8, 133.2,

131.0, 130.3, 130.2, 128.6, 128.5, 125.2, 20.0.

3-Methylbenzophenone (**2c**, CAS: 643-65-2<sup>[3]</sup>)

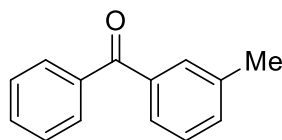

Colorless oil; 98% yield (96.2 mg). <sup>1</sup>H NMR (400 MHz, CDCl<sub>3</sub>): δ = 7.86-7.84 (m, 2H), 7.68 (s, 1H), 7.65-7.61 (m, 2H), 7.52 (t, *J* = 7.6 Hz, 2H), 7.46-7.38 (m, 2H), 2.47(s, 3H); <sup>13</sup>C NMR (100 MHz, CDCl<sub>3</sub>): δ =

197.0, 138.2, 137.8, 137.7, 133.2, 132.4, 130.5, 130.1, 128.3, 128.1, 127.4, 21.4.

4-Methylbenzophenone (**2d**, CAS: 134-84-9<sup>[3]</sup>)

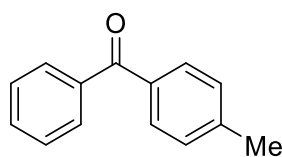

White solid; 98% yield (96.2 mg). <sup>1</sup>H NMR (400 MHz, CDCl<sub>3</sub>): δ = 7.84-7.82 (m, 2H), 7.78 (d, *J* = 8.0 Hz, 2H), 7.64-7.60 (m, 1H), 7.54-7.50 (m, 2H), 7.33 (d, *J* = 7.6 Hz, 2H), 2.49 (s, 3H); <sup>13</sup>C NMR (100 MHz, CDCl<sub>3</sub>): δ = 196.6, 143.3, 137.9, 134.9, 132.2, 130.4, 123.0, 129.0, 128.3, 21.7.

2-Methoxybenzophenone (**2e**, CAS: 2553-04-0<sup>[3]</sup>)

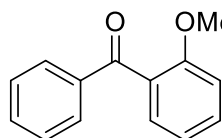

Colorless oil; 99% yield (105.1 mg). <sup>1</sup>H NMR (400 MHz, CDCl<sub>3</sub>): δ = 7.87-7.85 (m, 2H), 7.61-7.57 (m, 1H), 7.53-7.45 (m, 3H), 7.40 (dd, *J*<sub>1</sub> = 7.2 Hz, *J*<sub>2</sub> = 1.6 Hz, 1H), 7.10-7.03 (m, 2H), 3.76 (s, 3H); <sup>13</sup>C NMR (100 MHz, CDCl<sub>3</sub>): δ = 196.5, 157.4, 137.8, 133.0, 131.9, 129.9, 129.6, 128.8, 128.3, 120.5, 111.5, 55.6.

3-Methoxybenzophenone (**2f**, CAS: 6136-67-0<sup>[4]</sup>)

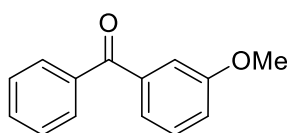

Colorless oil; 98% yield (104.0 mg). <sup>1</sup>H NMR (400 MHz, CDCl<sub>3</sub>): δ = 7.86-7.84 (m, 2H), 7.66-7.61 (m, 1H), 7.55-7.51 (m, 2H), 7.45-7.37 (m, 3H), 7.20-7.17 (m, 1H), 3.91 (s, 3H); <sup>13</sup>C NMR (100 MHz, CDCl<sub>3</sub>): δ = 196.6, 159.6, 138.9, 137.6, 132.5, 130.1, 129.3, 128.3, 122.9, 118.9, 114.3, 55.5.

4-Methoxybenzophenone (**2g**, CAS: 611-94-9<sup>[3]</sup>)

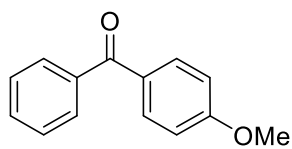

Colorless oil; 99% yield (105.1 mg). <sup>1</sup>H NMR (400 MHz, CDCl<sub>3</sub>): δ = 7.89-7.86 (m, 2H), 7.82-7.79 (m, 2H), 7.63-7.59 (m, 1H), 7.54-7.50 (m, 2H), 7.03-6.99 (m, 2H), 3.93 (s, 3H); <sup>13</sup>C NMR (100 MHz, CDCl<sub>3</sub>): δ = 195.6, 163.2, 138.3, 132.6, 131.9, 130.2, 129.8, 128.2, 113.6, 55.5.

2-Fluorobenzophenone (**2h**, CAS: 342-24-5<sup>[3]</sup>)

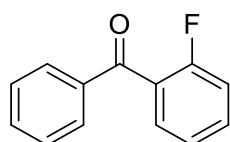

Colorless oil; 91% yield (91.1 mg). <sup>1</sup>H NMR (400 MHz, CDCl<sub>3</sub>): δ = 7.89 (d, *J* = 8.0 Hz, 2H), 7.67-7.50 (m, 5H), 7.31 (td, *J*<sub>1</sub> = 7.6 Hz, *J*<sub>2</sub> = 0.8 Hz, 1H), 7.23-7.18 (m, 1H); <sup>13</sup>C NMR (100 MHz, CDCl<sub>3</sub>): δ = 193.5, 160.1 (d, *J* = 250.8 Hz), 137.4, 133.5, 133.1 (d, *J* = 8.3 Hz), 130.8 (d, *J* = 2.9 Hz), 129.8, 128.5, 127.0 (d, *J* = 14.7 Hz), 124.3 (d, *J* = 3.6 Hz), 116.3 (d, *J* = 21.6 Hz). <sup>19</sup>F NMR (CDCl<sub>3</sub>, 376 MHz): δ -111.0.

4-Fluorobenzophenone (**2i**, CAS: 345-83-5<sup>[3]</sup>)

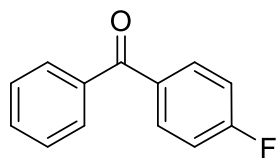

Yellow oil; 99% yield (99.1 mg). <sup>1</sup>H NMR (400 MHz, CDCl<sub>3</sub>): δ = 7.91-7.86 (m, 2H), 7.82-7.80 (m, 2H), 7.63 (tt, *J*<sub>1</sub> = 6.8 Hz, *J*<sub>2</sub> = 1.3 Hz, 1H), 7.55-7.51 (m, 2H), 7.23-7.17 (m, 2H); <sup>13</sup>C NMR (100 MHz, CDCl<sub>3</sub>): δ =

= 195.3, 165.4 (d,  $J = 252.6$  Hz), 137.5, 133.8 (d,  $J = 3.0$  Hz), 132.7 (d,  $J = 9.1$  Hz), 132.5, 129.9, 128.4, 115.5 (d,  $J = 21.7$  Hz).  $^{19}\text{F}$  NMR ( $\text{CDCl}_3$ , 376 MHz):  $\delta$  -105.89.

2-Chlorobenzophenone (**2j**, CAS: 5162-03-8<sup>[3]</sup>)

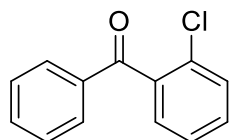

Colorless oil; 91% yield (98.6 mg).  $^1\text{H}$  NMR (400 MHz,  $\text{CDCl}_3$ ):  $\delta$  = 7.87-7.85 (m, 2H), 7.67-7.63 (m, 1H), 7.53-7.46 (m, 4H), 7.44-7.41 (m, 2H);  $^{13}\text{C}$  NMR (100 MHz,  $\text{CDCl}_3$ ):  $\delta$  = 195.4, 138.6, 136.5, 133.8, 131.3, 131.2, 130.1, 130.1, 129.2, 128.6, 126.7.

4-Chlorobenzophenone (**2k**, CAS: 134-85-0<sup>[3]</sup>)

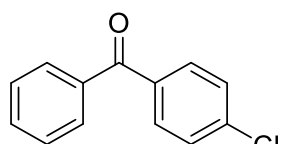

White solid; 97% yield (105.1 mg).  $^1\text{H}$  NMR (400 MHz,  $\text{CDCl}_3$ ):  $\delta$  = 7.83-7.79 (m, 4H), 7.67-7.63 (m, 1H), 7.56-7.49 (m, 4H);  $^{13}\text{C}$  NMR (100 MHz,  $\text{CDCl}_3$ ):  $\delta$  = 195.6, 138.9, 137.2, 135.9, 132.7, 131.5, 130.0, 128.7, 128.4.

2-Bromobenzophenone (**2l**, CAS: 13047-06-8<sup>[3]</sup>)

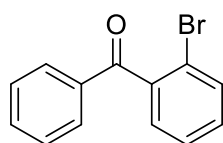

Colorless oil; 90% yield (117.5 mg).  $^1\text{H}$  NMR (400 MHz,  $\text{CDCl}_3$ ):  $\delta$  = 7.87-7.85 (m, 2H), 7.71-7.63 (m, 2H), 7.53-7.45 (m, 3H), 7.43-7.38 (m, 2H);  $^{13}\text{C}$  NMR (100 MHz,  $\text{CDCl}_3$ ):  $\delta$  = 195.9, 140.7, 136.1, 133.8, 133.2, 131.2, 130.3, 129.0, 128.7, 127.2, 119.6.

2-(Trifluoromethyl)benzophenone (**2m**, CAS: 727-99-1<sup>[3]</sup>)

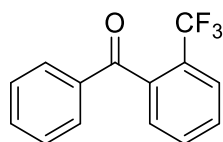

White solid; 73% yield (103.8 mg).  $^1\text{H}$  NMR (400 MHz,  $\text{CDCl}_3$ ):  $\delta$  = 7.84-7.82 (m, 3H), 7.68-7.63 (m, 3H), 7.53-7.49 (m, 2H), 7.45-7.42 (m, 1H);  $^{13}\text{C}$  NMR (100 MHz,  $\text{CDCl}_3$ ):  $\delta$  = 195.6, 138.3, 136.4, 133.9, 131.4, 130.3, 129.8, 128.6, 128.1, 126.7 (q,  $J = 4.6$  Hz), 125.0, 122.3 (q,  $J = 272.3$  Hz);  $^{19}\text{F}$  NMR ( $\text{CDCl}_3$ , 376 MHz):  $\delta$  -57.99.

3-(Trifluoromethyl)benzophenone (**2n**, CAS: 728-81-4<sup>[5]</sup>)

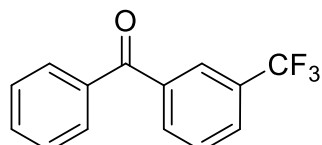

White solid; 99% yield (123.9 mg).  $^1\text{H}$  NMR (400 MHz,  $\text{CDCl}_3$ ):  $\delta$  = 8.11 (s, 1H), 8.03 (d,  $J = 8$  Hz, 1H), 7.90 (d,  $J = 7.6$  Hz, 1H), 7.86-7.83 (m, 2H), 7.70-7.66 (m, 2H), 7.58-7.55 (m, 2H);  $^{13}\text{C}$  NMR (100

MHz,  $\text{CDCl}_3$ ):  $\delta$  = 195.3, 138.3, 136.7, 133.2, 133.1, 130.8, 130.1, 129.0, 128.9 (q,  $J = 3.0$  Hz), 128.6, 126.7 (q,  $J = 3.7$  Hz), 125.1 (q,  $J = 271.0$  Hz);  $^{19}\text{F}$  NMR ( $\text{CDCl}_3$ , 376 MHz):  $\delta$  -62.70.

(3,5-Dimethylphenyl)(phenyl)methanone (**2o**, CAS: 13319-70-5<sup>[6]</sup>)

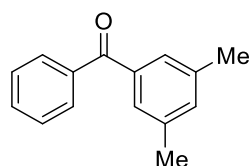

Colorless oil; 99% yield (104.1 mg). <sup>1</sup>H NMR (400 MHz, CDCl<sub>3</sub>): δ = 7.85-7.83 (m, 2H), 7.65-7.61 (m, 1H), 7.54-7.51 (m, 2H), 7.45 (s, 2H), 7.27 (s, 1H), 2.42 (s, 6H); <sup>13</sup>C NMR (100 MHz, CDCl<sub>3</sub>): δ = 197.3, 138.0, 137.9, 137.7, 134.1, 132.3, 130.1, 128.3, 127.9, 21.3.

2,4-Difluorobenzophenone (**2p**, CAS: 85068-35-5<sup>[6]</sup>)

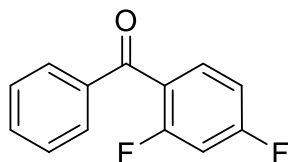

White solid; 90% yield (98.2 mg). <sup>1</sup>H NMR (400 MHz, CDCl<sub>3</sub>): δ = 7.87-7.84 (m, 2H), 7.68-7.62 (m, 2H), 7.54-7.51 (m, 2H), 7.08-7.03 (m, 1H), 6.95 (ddd, *J*<sub>1</sub> = 10.0 Hz, *J*<sub>2</sub> = 8.8 Hz, *J*<sub>3</sub> = 2.4 Hz, 1H); <sup>13</sup>C NMR (100 MHz, CDCl<sub>3</sub>): δ = 192.4, 166.2 (dd, *J* = 253.1 Hz, 11.6 Hz), 162.2 (dd, *J* = 254.4 Hz, 11.7 Hz), 137.4, 133.5, 132.5 (dd, *J* = 10.2 Hz, 4.3 Hz), 129.7, 128.5, 123.3 (dd, *J* = 14.6 Hz, 3.8 Hz), 111.9 (dd, *J* = 21.4 Hz, 3.7 Hz), 104.7 (t, *J* = 25.4 Hz); <sup>19</sup>F NMR (CDCl<sub>3</sub>, 376 MHz): δ -103.7 (d, *J* = 10.4 Hz), -105.8 (d, *J* = 10.4 Hz).

(2-Fluoro-4-methoxyphenyl)(phenyl)methanone (**2q**, CAS: 1156360-90-5<sup>[7]</sup>)

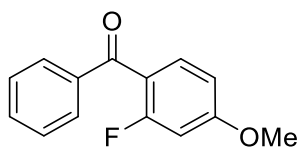

White solid; 90% yield (103.6 mg). <sup>1</sup>H NMR (400 MHz, CDCl<sub>3</sub>): δ = 7.85-7.83 (m, 2H), 7.64-7.60 (m, 2H), 7.52-7.49 (m, 2H), 6.83 (dd, *J*<sub>1</sub> = 8.6 Hz, *J*<sub>2</sub> = 2.4 Hz, 1H), 6.71 (dd, *J*<sub>1</sub> = 12.0 Hz, *J*<sub>2</sub> = 2.4 Hz, 1H), 3.92 (s, 3H); <sup>13</sup>C NMR (100 MHz, CDCl<sub>3</sub>): δ = 192.9, 163.9 (d, *J* = 11.2 Hz), 163.2 (d, *J* = 252.6 Hz), 138.3, 132.9, 132.7 (d, *J* = 4.4 Hz), 129.6 (d, *J* = 1.3 Hz), 128.3, 119.3 (d, *J* = 13.8 Hz), 110.3 (d, *J* = 2.9 Hz), 101.9 (d, *J* = 25.6 Hz), 55.9.

(2,6-Difluorophenyl)(p-tolyl)methanone (**2r**, known compound<sup>[8]</sup>)

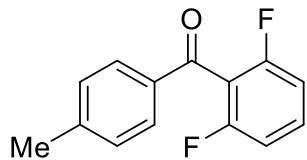

Colourless oil; 86% yield (99.9 mg). <sup>1</sup>H NMR (400 MHz, CDCl<sub>3</sub>): δ = 7.81 (d, *J* = 8.0 Hz, 2H), 7.48 (tt, *J*<sub>1</sub> = 8.4 Hz, *J*<sub>2</sub> = 6.4 Hz, 1H), 7.33 (d, *J* = 8.0 Hz, 2H), 7.07-7.01 (m, 2H), 2.48 (s, 3H); <sup>13</sup>C NMR (100 MHz, CDCl<sub>3</sub>): δ = 188.5, 161.0 (d, *J* = 249.6 Hz), 158.5 (d, *J* = 249.9 Hz), 145.4, 134.5, 131.7 (t, *J* = 9.8 Hz), 129.8, 129.5, 117.3, 112.0 (d, *J* = 25.1 Hz), 111.9 (dd, *J* = 18.0 Hz, 4.1 Hz), 21.9; <sup>19</sup>F NMR (CDCl<sub>3</sub>, 376 MHz): δ -111.9.

4,4'-Dimethoxybenzophenone (**2s**, CAS: 90-96-0<sup>[9]</sup>)

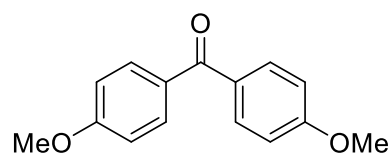

White solid; 95% yield (113.9 mg). <sup>1</sup>H NMR (400 MHz, CDCl<sub>3</sub>):  $\delta$  = 7.85-7.81 (m, 4H), 7.02-6.98 (m, 4H), 3.93 (s, 6H); <sup>13</sup>C NMR (100 MHz, CDCl<sub>3</sub>):  $\delta$  = 194.5, 162.9, 132.3, 130.8, 113.5, 55.5.

(4-Chlorophenyl)(3-(trifluoromethyl)phenyl)methanone (**2t**, CAS: 91503-65-0<sup>[10]</sup>)

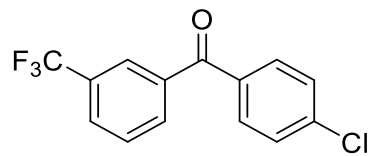

White solid; 97% yield (138.1 mg). <sup>1</sup>H NMR (400 MHz, CDCl<sub>3</sub>):  $\delta$  = 8.08 (s, 1H), 7.99 (d, *J* = 7.6 Hz, 1H), 7.91 (d, *J* = 7.6 Hz, 1H), 7.81-7.78 (m, 2H), 7.69 (t, *J* = 8.0 Hz, 1H), 7.56-7.52 (m, 2H); <sup>13</sup>C NMR (100 MHz, CDCl<sub>3</sub>):  $\delta$  = 194.0, 139.6, 137.9, 135.0, 133.0, 131.4, 131.0 (q, *J* = 32.9 Hz), 129.1, 129.1, 129.0, 126.6 (q, *J* = 3.8 Hz), 125.0 (q, *J* = 270.9 Hz). <sup>19</sup>F NMR (CDCl<sub>3</sub>, 376 MHz):  $\delta$  -62.8.

3,5-Dimethyl-4'-(trifluoromethyl)benzophenone (**2u**, known compound<sup>[11]</sup>)

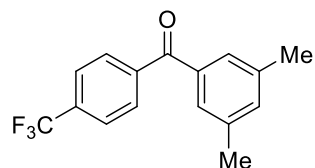

Colorless oil; 99% yield (137.7 mg). <sup>1</sup>H NMR (400 MHz, CDCl<sub>3</sub>):  $\delta$  = 7.92 (d, *J* = 8.0 Hz, 2H), 7.79 (d, *J* = 8.4 Hz, 2H), 7.44 (s, 2H), 7.30 (s, 1H), 2.43 (s, 6H); <sup>13</sup>C NMR (100 MHz, CDCl<sub>3</sub>):  $\delta$  = 196.0, 141.1, 138.3, 136.9, 134.8, 133.6 (q, *J* = 32.5 Hz), 130.1, 127.9, 125.3 (q, *J* = 3.7 Hz), 122.4 (q, *J* = 271.0 Hz), 21.24.

2-Naphthyl Phenyl Ketone (**2v**, CAS: 644-13-3<sup>[12]</sup>)

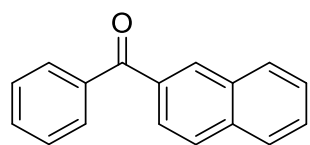

White solid; 81% yield (95.0 mg). <sup>1</sup>H NMR (400 MHz, CDCl<sub>3</sub>):  $\delta$  = 8.32 (s, 1H), 8.00-7.96 (m, 4H), 7.92-7.90 (m, 2H), 7.69-7.64 (m, 2H), 7.62-7.55 (m, 3H); <sup>13</sup>C NMR (100 MHz, CDCl<sub>3</sub>):  $\delta$  = 196.8, 137.9, 135.3, 134.8, 132.4, 132.3, 131.9, 130.2, 130.1, 129.5, 128.4, 128.3, 127.8, 126.8, 125.8.

3-Benzoylthiophene (**2w**, CAS: 6453-99-2<sup>[6]</sup>)

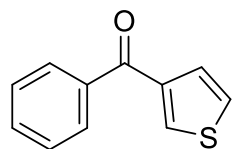

Yellow oil; 60% yield (56.5 mg). <sup>1</sup>H NMR (400 MHz, CDCl<sub>3</sub>):  $\delta$  = 7.97 (dd, *J*<sub>1</sub> = 2.8 Hz, *J*<sub>2</sub> = 1.2 Hz, 1H), 7.90-7.88 (m, 2H), 7.66-7.61 (m, 2H), 7.53 (t, *J* = 7.6 Hz, 2H), 7.43 (dd, *J*<sub>1</sub> = 5.0 Hz, *J*<sub>2</sub> = 2.8 Hz, 1H); <sup>13</sup>C NMR (100 MHz, CDCl<sub>3</sub>):  $\delta$  = 190.1, 141.3, 138.6, 134.0, 132.4, 129.4, 128.6, 128.4, 126.3.

2-Benzoylpyridine (**2x**, CAS: 91-02-1<sup>[9]</sup>)

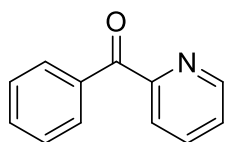

Slightly yellow solid; 95% yield (87.1 mg).  $^1\text{H NMR}$  (400 MHz,  $\text{CDCl}_3$ ):  $\delta$  = 8.71 (d,  $J$  = 4.8 Hz, 1H), 8.09-8.02 (m, 3H), 7.90-7.85 (m, 1H), 7.61-7.56 (m, 1H), 7.50-7.45 (m, 3H);  $^{13}\text{C NMR}$  (100 MHz,  $\text{CDCl}_3$ ):  $\delta$  = 193.9, 155.0, 148.6, 137.1, 136.3, 132.9, 131.0, 128.2, 126.2, 124.6.

9-Fluorenone (**2y**, CAS: 486-25-9<sup>[12]</sup>)

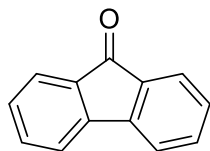

Yellow solid; 87% yield (78.7 mg).  $^1\text{H NMR}$  (400 MHz,  $\text{CDCl}_3$ ):  $\delta$  = 7.68 (d,  $J$  = 7.2 Hz, 2H), 7.53-7.48 (m, 4H), 7.31 (td,  $J_1$  = 7.2 Hz,  $J_2$  = 1.6 Hz, 2H);  $^{13}\text{C NMR}$  (100 MHz,  $\text{CDCl}_3$ ):  $\delta$  = 193.9, 144.4, 134.7, 134.1, 129.1, 124.3, 120.3.

Thioxanthen-9-one (**2z**, CAS: 492-22-8<sup>[12]</sup>)

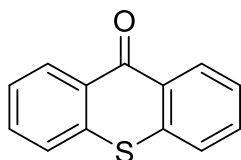

Pale yellow solid; 85% yield (90.2 mg).  $^1\text{H NMR}$  (400 MHz,  $\text{CDCl}_3$ ):  $\delta$  = 8.65 (dd,  $J_1$  = 8.0 Hz,  $J_2$  = 1.2 Hz, 2H), 7.67-7.59 (m, 4H), 7.53-7.49 (m, 2H);  $^{13}\text{C NMR}$  (100 MHz,  $\text{CDCl}_3$ ):  $\delta$  = 180.0, 137.3, 132.3, 129.9, 129.2, 126.3, 126.0.

Acetophenone (**2aa**, CAS: 98-86-2<sup>[13]</sup>)

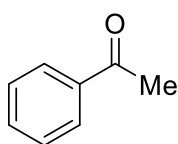

Colourless oil; 99% yield (59.5 mg).  $^1\text{H NMR}$  (400 MHz,  $\text{CDCl}_3$ ):  $\delta$  = 7.93-7.91 (m, 2H), 7.52 (tt,  $J_1$  = 6.8 Hz,  $J_2$  = 1.2 Hz, 1H), 7.44-7.40 (m, 1H), 2.55 (s, 3H);  $^{13}\text{C NMR}$  (100 MHz,  $\text{CDCl}_3$ ):  $\delta$  = 198.0, 137.1, 133.1, 128.5, 128.3, 26.5.

Cyclopropyl Phenyl Ketone (**2ab**, CAS: 3481-02-5<sup>[13]</sup>)

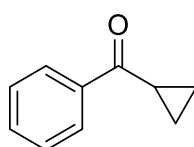

Colourless oil; 93% yield (68.0 mg).  $^1\text{H NMR}$  (400 MHz,  $\text{CDCl}_3$ ):  $\delta$  = 8.05-8.03 (m, 2H), 7.59-7.55 (m, 1H), 7.50-7.46 (m, 2H), 2.72-2.66 (m, 1H), 1.29-1.24 (m, 2H), 1.07-1.03 (m, 2H);  $^{13}\text{C NMR}$  (100 MHz,  $\text{CDCl}_3$ ):  $\delta$  = 200.6, 138.0, 132.7, 128.5, 128.0, 17.1, 11.7.

4-Bromobenzaldehyde (**2ac**, CAS: 1122-91-4<sup>[13]</sup>)

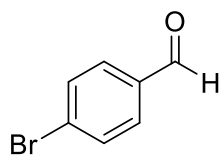

White solid; 92% and 89% yield.  $^1\text{H NMR}$  (400 MHz,  $\text{CDCl}_3$ ):  $\delta$  = 10.02-10.01 (m, 1H), 7.80-7.77 (m, 2H), 7.54-7.51 (m, 2H), 7.74-7.71 (m, 2H);  $^{13}\text{C NMR}$  (100 MHz,  $\text{CDCl}_3$ ):  $\delta$  = 191.1, 135.1, 132.5, 131.0, 129.8.

Benzaldehyde (**2ad**, CAS: 100-52-7<sup>[13]</sup>)

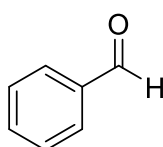

Colorless liquid; 95% and 90% yield.  $^1\text{H NMR}$  (400 MHz,  $\text{CDCl}_3$ ):  $\delta$  = 10.00-9.99 (m, 1H), 7.86-7.84 (m, 2H), 7.61-7.57 (m, 1H), 7.51-7.47 (m, 2H);  $^{13}\text{C NMR}$  (100 MHz,  $\text{CDCl}_3$ ):  $\delta$  = 192.3, 136.4, 134.4, 129.7, 129.0.



Terephthalaldehyde (**2ae** CAS: 623-27-8<sup>[14]</sup>)

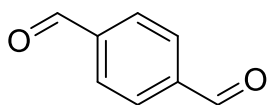

White solid; 83% yield (55.4 mg). <sup>1</sup>H NMR (400 MHz, CDCl<sub>3</sub>):  $\delta$  = 10.18-10.17 (m, 2H), 8.10-8.09 (m, 4H); <sup>13</sup>C NMR (100 MHz, CDCl<sub>3</sub>):  $\delta$  = 191.5, 140.0, 130.2.

2-Methylbenzaldehyde (**2ae'**, CAS: 529-20-4<sup>[14]</sup>)

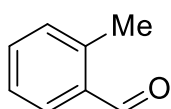

Colorless liquid; 82% yield (49.4 mg). <sup>1</sup>H NMR (400 MHz, CDCl<sub>3</sub>):  $\delta$  = 10.28 (s, 1H), 7.81 (d,  $J$  = 7.6 Hz, 1H), 7.49 (td,  $J_1$  = 7.2 Hz,  $J_2$  = 1.2 Hz, 1H), 7.37 (t,  $J$  = 7.6 Hz, 1H), 7.27 (d,  $J$  = 7.6 Hz, 1H), 2.68 (s, 3H); <sup>13</sup>C NMR (100 MHz, CDCl<sub>3</sub>):  $\delta$  = 192.8, 140.6, 134.1, 133.7, 132.1, 131.8, 126.3, 19.6.

#### Reference:

- [1] Wang, T. Q.; Hu, Y. Y.; Zhang, S. L. *Org. Biomol. Chem.*, **2010**, *8*, 2312.
- [2] H. Yu, X. B. Deng, S. L. Cao, J. X. Xu, *Lett. Org. Chem.*, 2011, **8**, 509.
- [3] P. Ghosh, B. Ganguly, S. Das, *Appl. Organomet. Chem.*, 2018, **32**, e4173.
- [4] S. Bhadra, W. I. Dzik, L. J. Goossen, *J. Am. Chem. Soc.*, 2012, **134**, 9938.
- [5] P. Lei, G. R. Meng, Y. Ling, J. An, S. P. Nolan, M. Szostak, *Org. Lett.*, 2017, **19**, 6510.
- [6] H. Y. Zhao, H. Y. Du, X. R. Yuan, T. J. Wang, W. Han, *Green Chem.*, 2016, **18**, 5782.
- [7] B. V. Yang, D. S. Weinstein, L. M. Doweyko, H. Gong, W. Vaccaro, T. Huynh, H. Y. Xiao, A. M. Doweyko, L. Mckay, D. A. Holloway, *J. Med. Chem.*, 2010, **53**, 8241.
- [8] P. H. Tran, P. E. Hansen, H. T. Nguyen, T. N. Le, *Tetrahedron Lett.*, 2015, **56**, 612.
- [9] Y. Zhang, N. Hatami, N. S. Lange, E. Ronge, W. Schilling, C. Jooss, S. Das, *Green Chem.*, 2020, **22**, 4516.
- [10] M. Keenan, M. J. Abbott, P. W. Alexander, T. Armstrong, W. M. Best, *J. Med. Chem.*, 2012, **55**, 4189.
- [11] J. N. Moorthy, S. Samanta, *J. Org. Chem.*, 2007, **72**, 9786.
- [12] G. Z. Wang, X. L. Li, J. J. Dai, H. J. Xu, *J. Org. Chem.*, 2014, **79**, 7220.
- [13] A. Gonzalez-de-Castro, J. L. Xiao, *J. Am. Chem. Soc.*, 2015, **137**, 8206.
- [14] B. Yu, Z. Z. Yang, Y. F. Zhao, L. D. Hao, H. Y. Zhang, X. Gao, B. X. Han, Z. M. Liu, *Chem. - Eur. J.*, 2016, **22**, 1097.

## 6. NMR spectra of the products

### $^1\text{H}$ & $^{13}\text{C}$ NMR of 2a

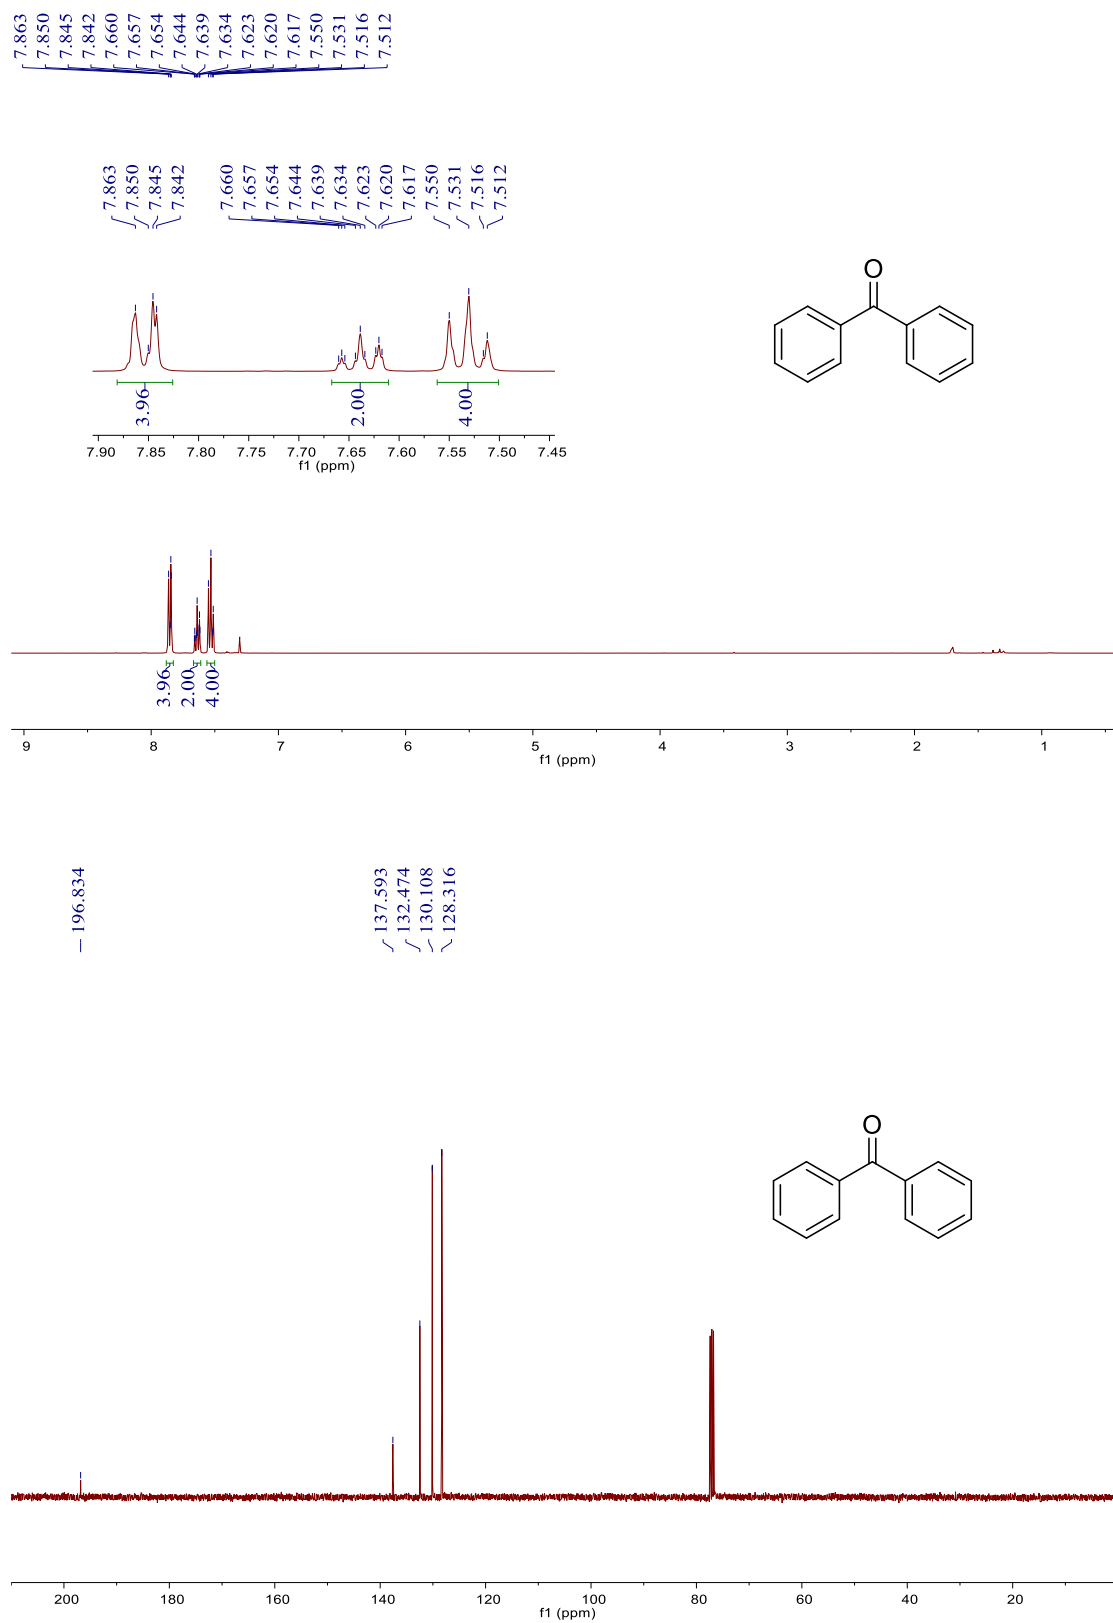

# <sup>1</sup>H & <sup>13</sup>C NMR of 2b

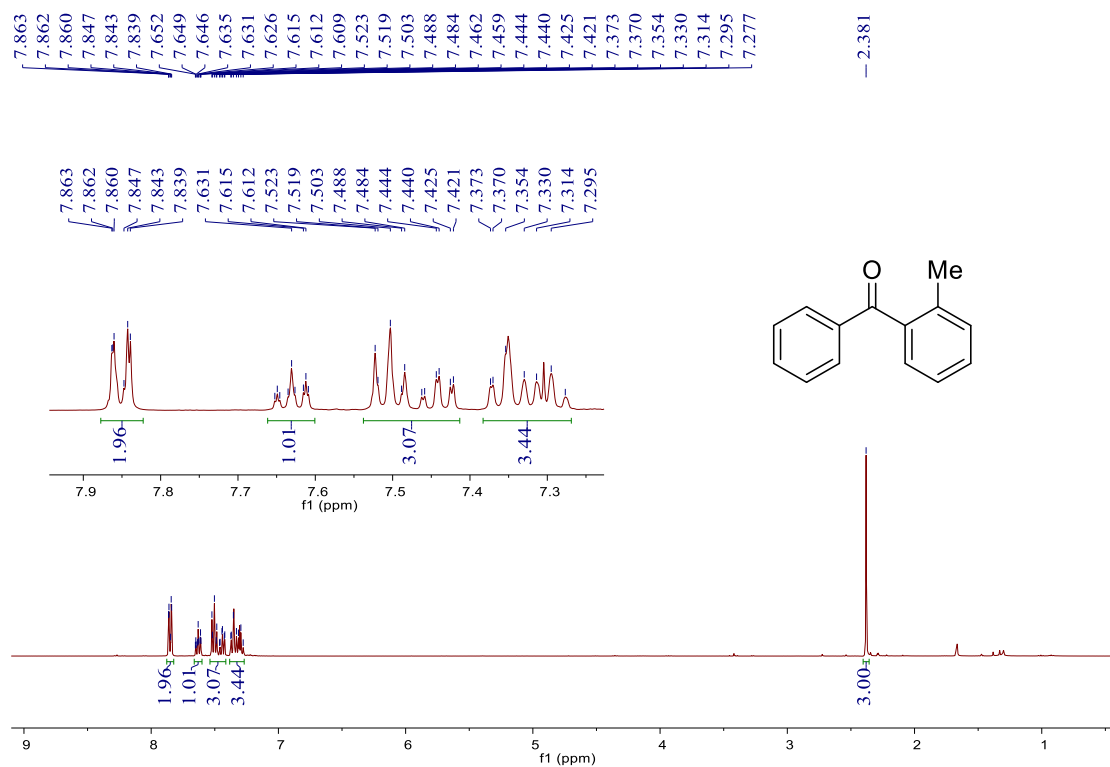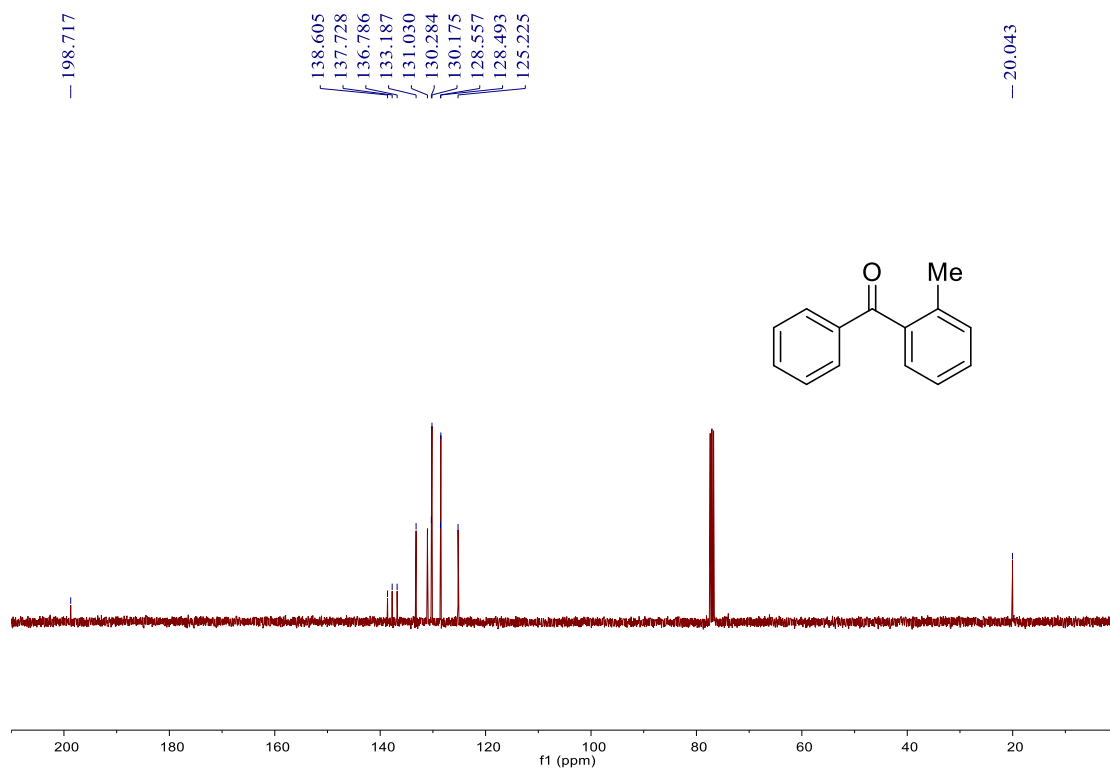

# $^1\text{H}$ & $^{13}\text{C}$ NMR of 2c

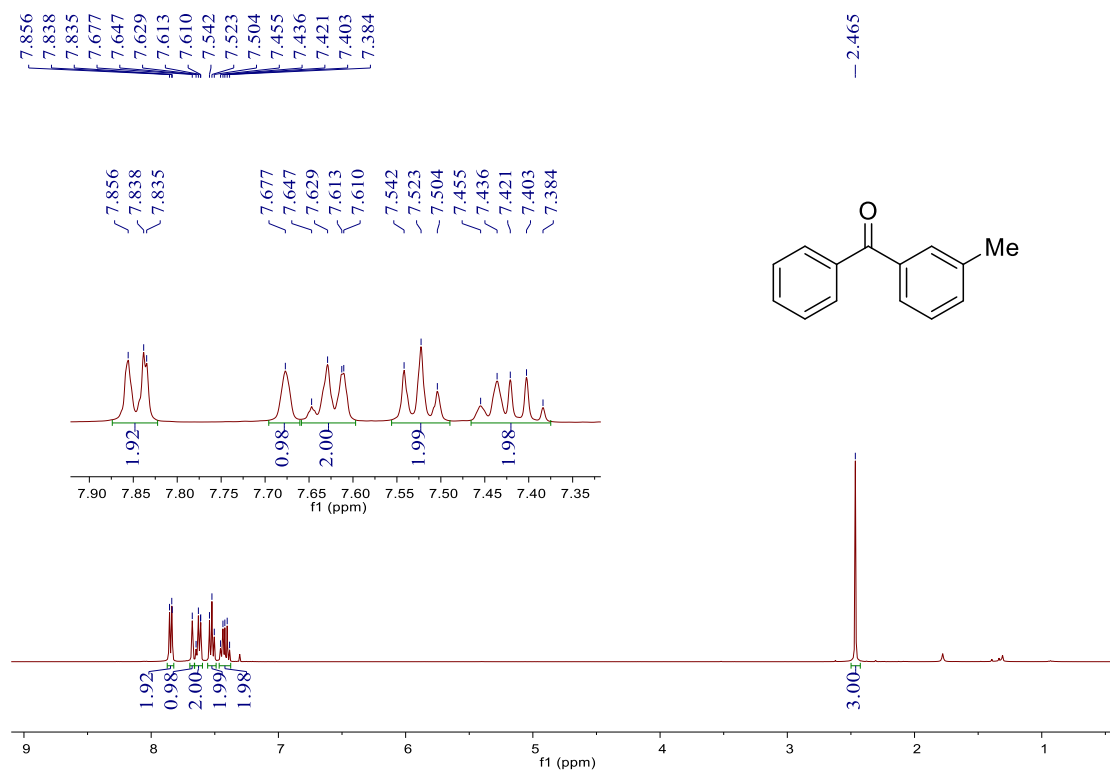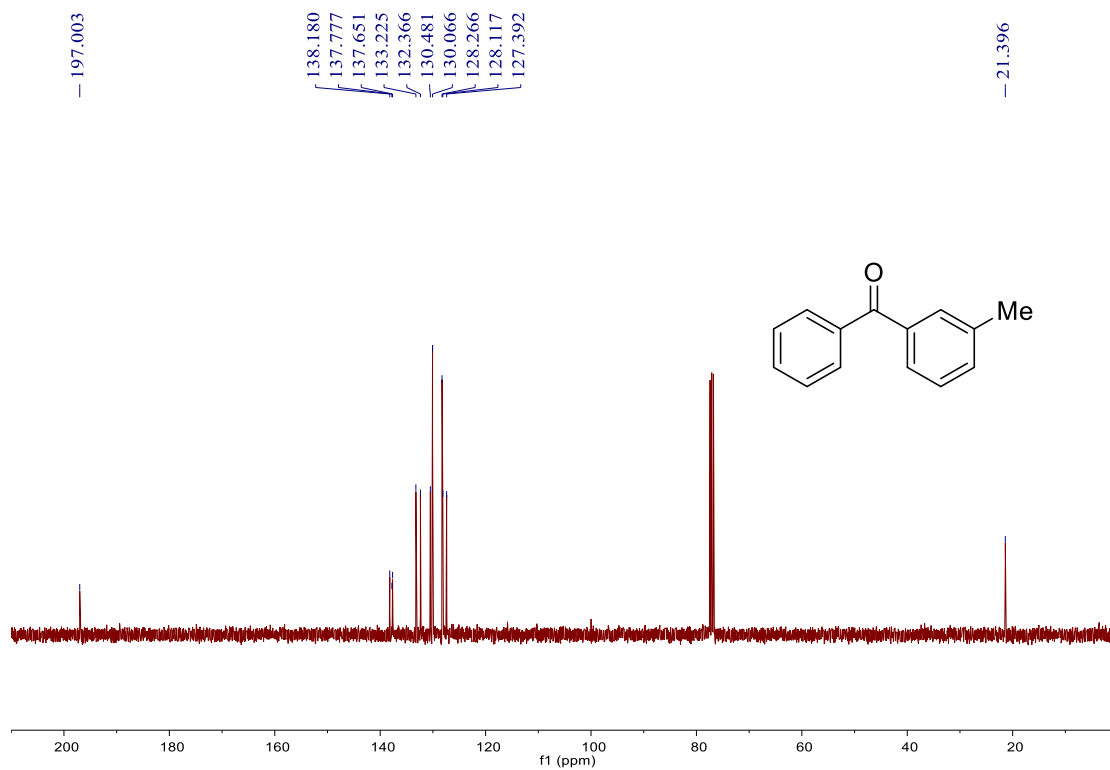

# $^1\text{H}$ & $^{13}\text{C}$ NMR of 2d

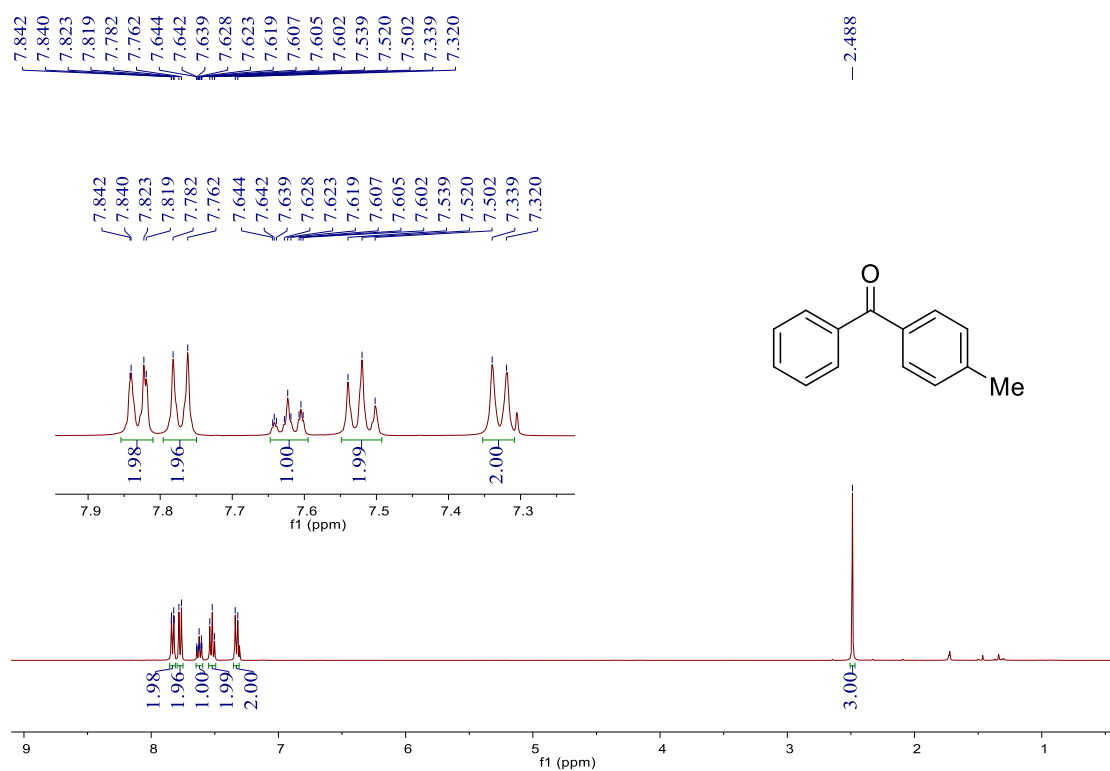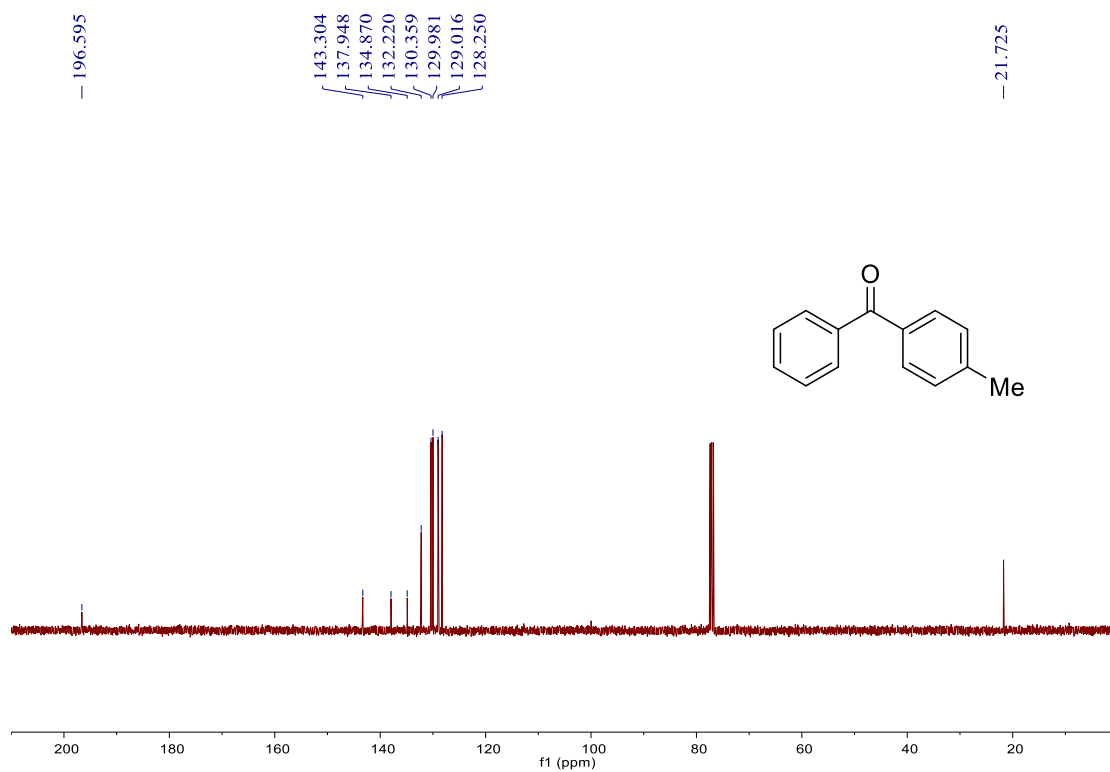

**$^1\text{H}$  &  $^{13}\text{C}$  &  $^{19}\text{F}$  NMR of 2e**

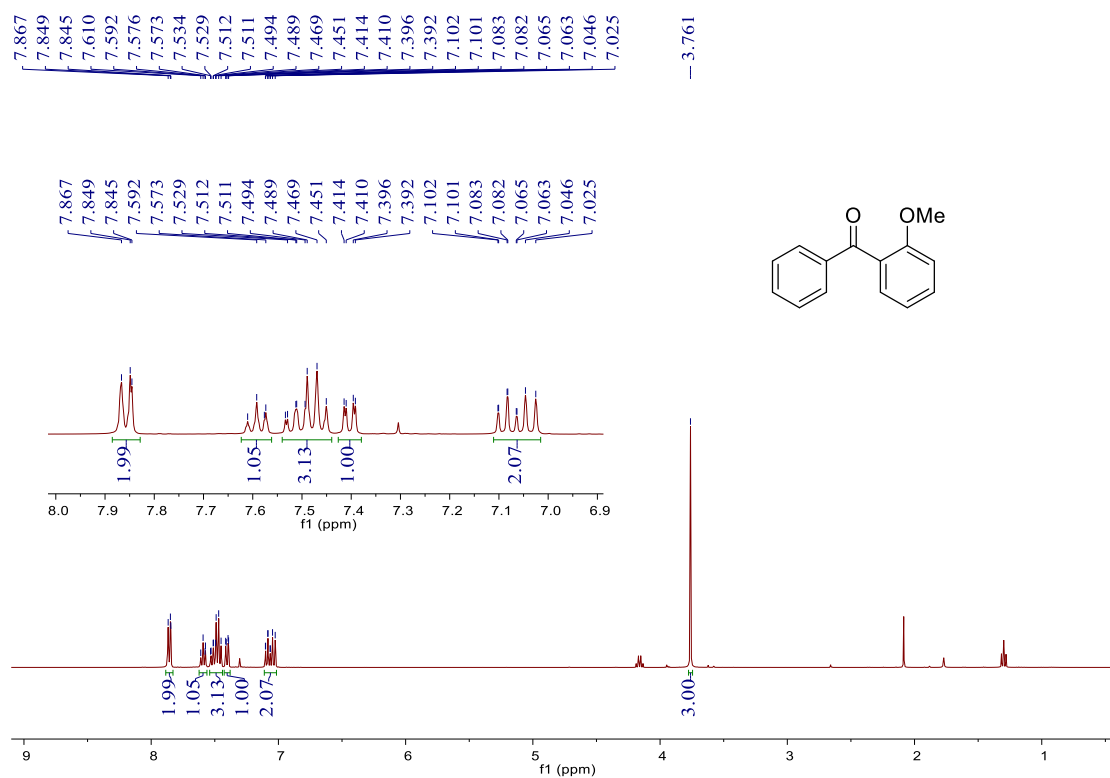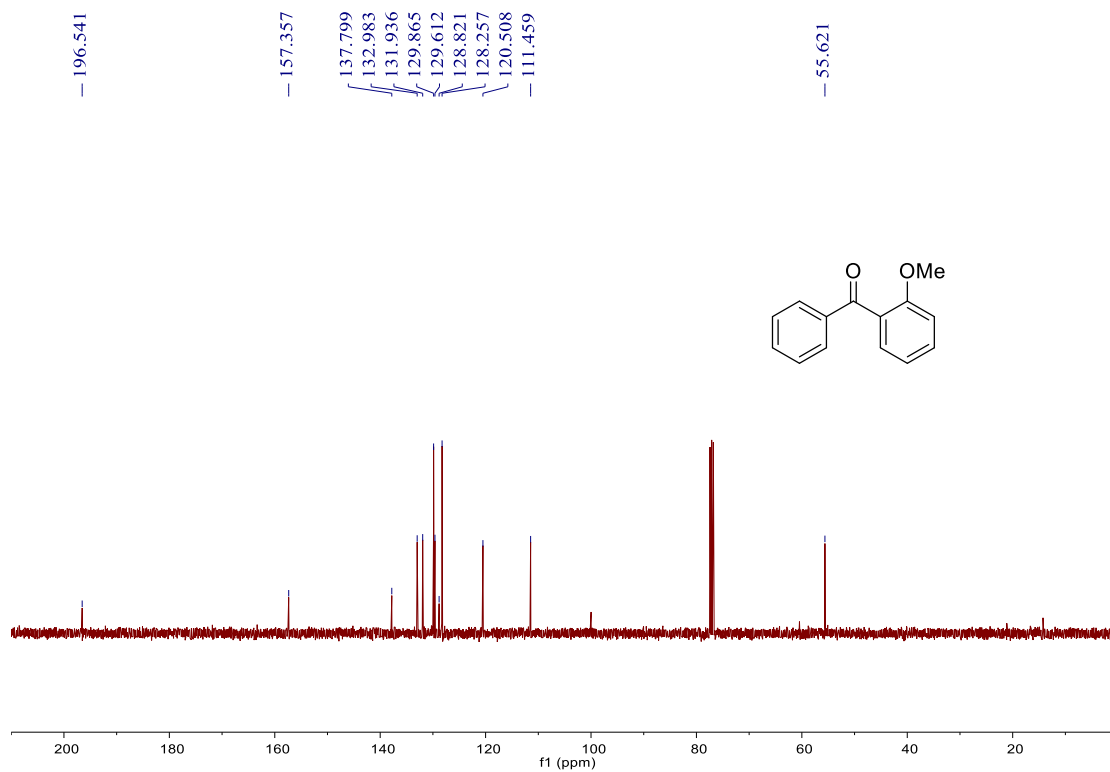

# $^1\text{H}$ & $^{13}\text{C}$ NMR of 2f

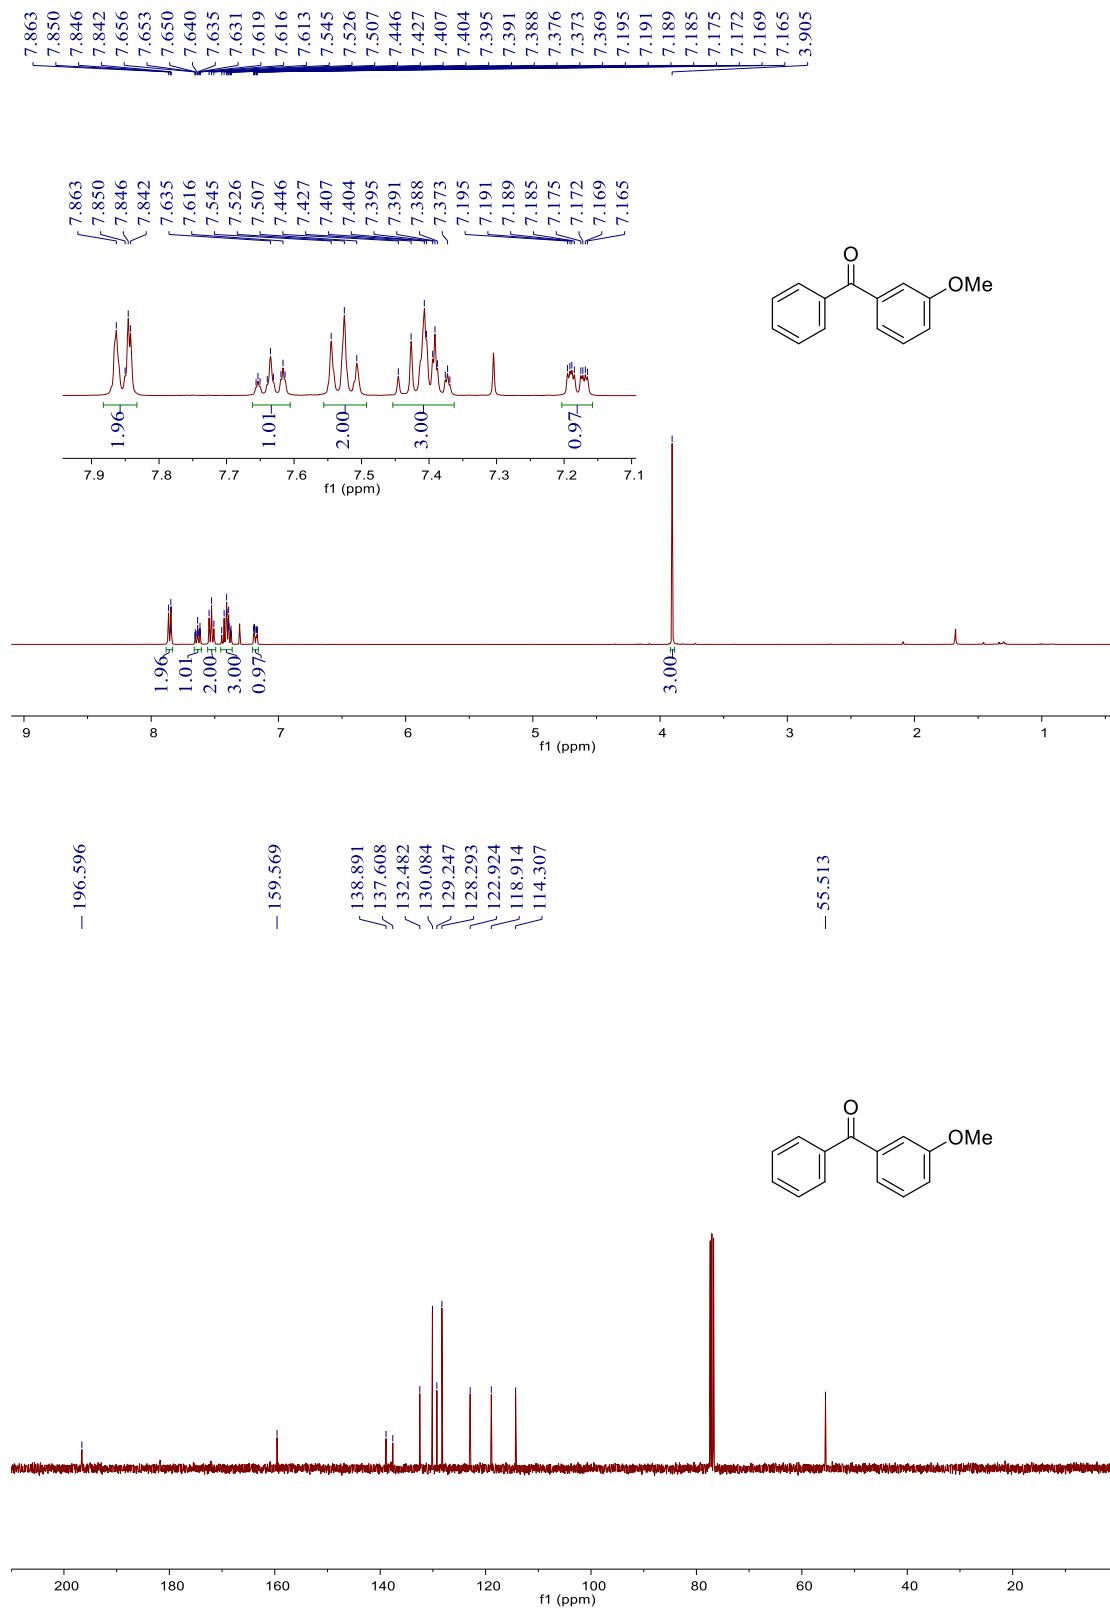

# $^1\text{H}$ & $^{13}\text{C}$ NMR of 2g

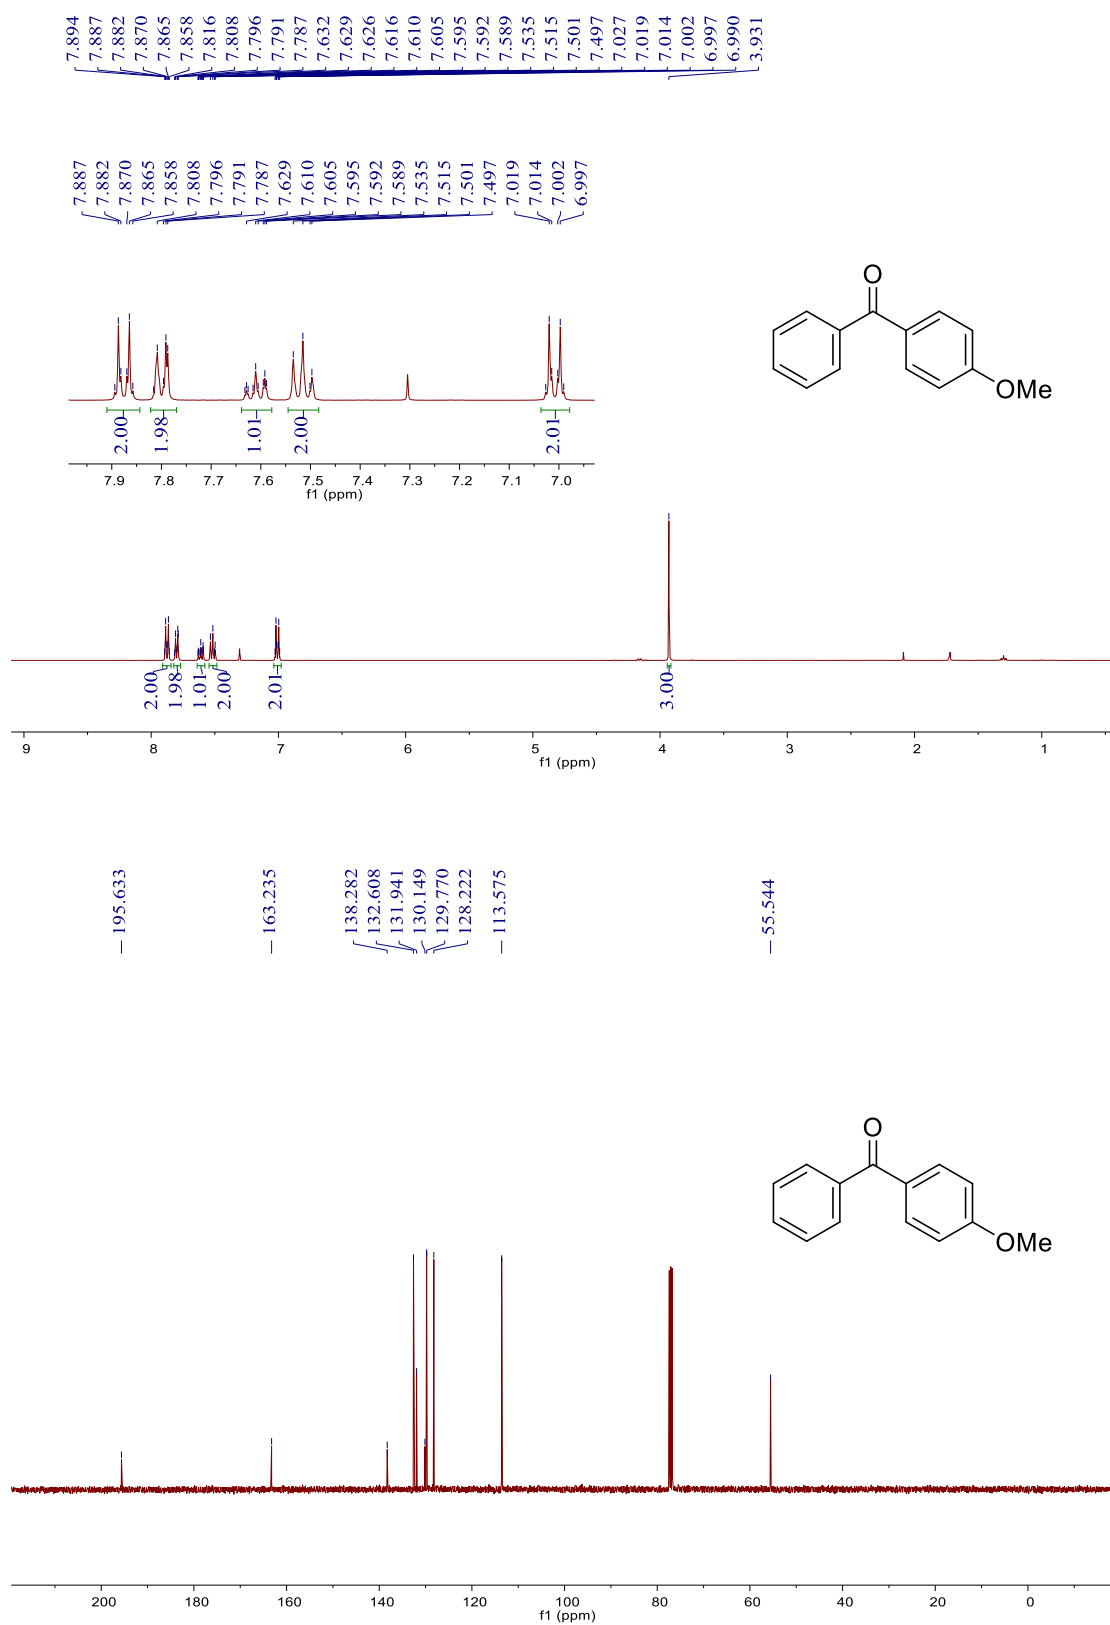



# <sup>1</sup>H & <sup>13</sup>C & <sup>19</sup>F NMR of 2h

7.898  
7.878  
7.665  
7.646  
7.631  
7.628  
7.625  
7.621  
7.617  
7.602  
7.598  
7.589  
7.584  
7.581  
7.570  
7.564  
7.559  
7.550  
7.550  
7.545  
7.538  
7.538  
7.519  
7.500  
7.332  
7.330  
7.313  
7.312  
7.294  
7.293  
7.229  
7.206  
7.313  
7.312  
7.304  
7.294  
7.229  
7.206  
7.184

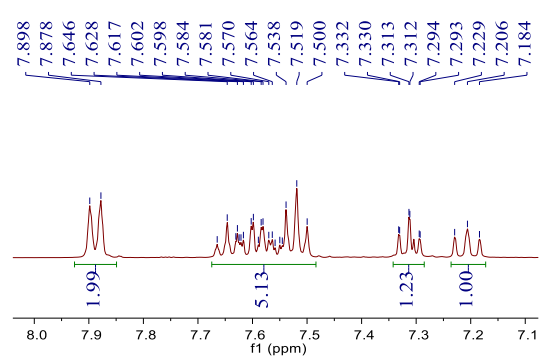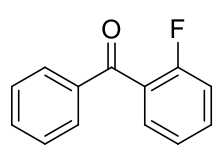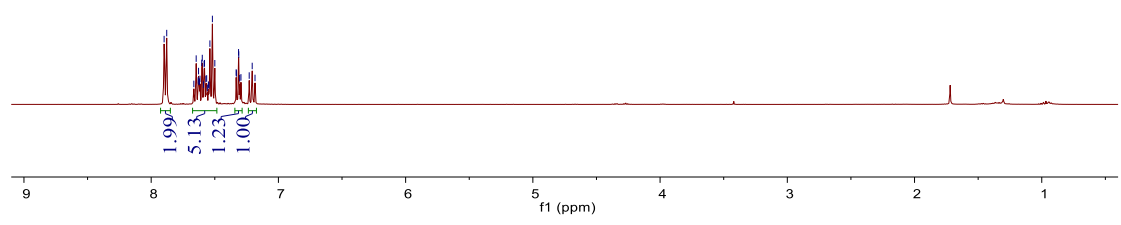

193.536  
161.356  
158.848  
137.386  
133.463  
133.153  
133.070  
130.808  
130.779  
129.844  
128.497  
127.104  
126.957  
124.335  
124.299  
116.417  
116.201

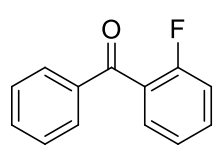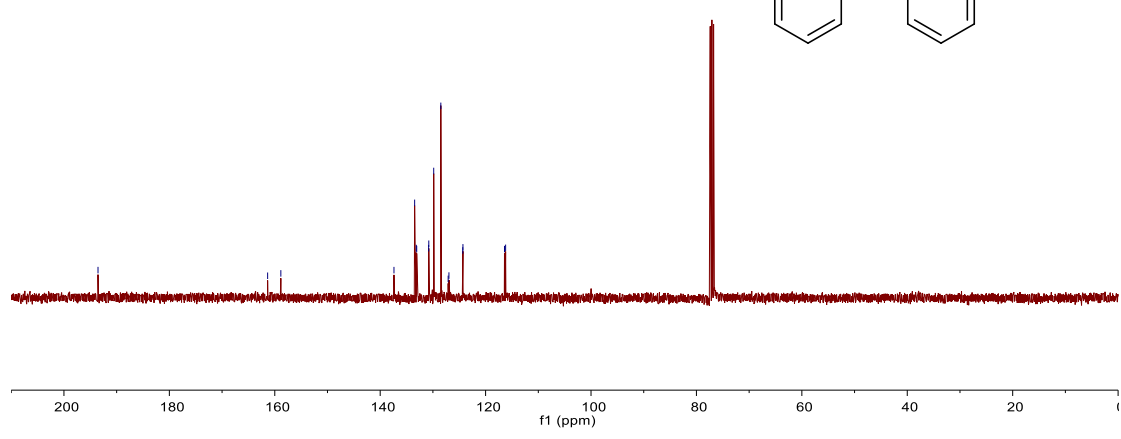

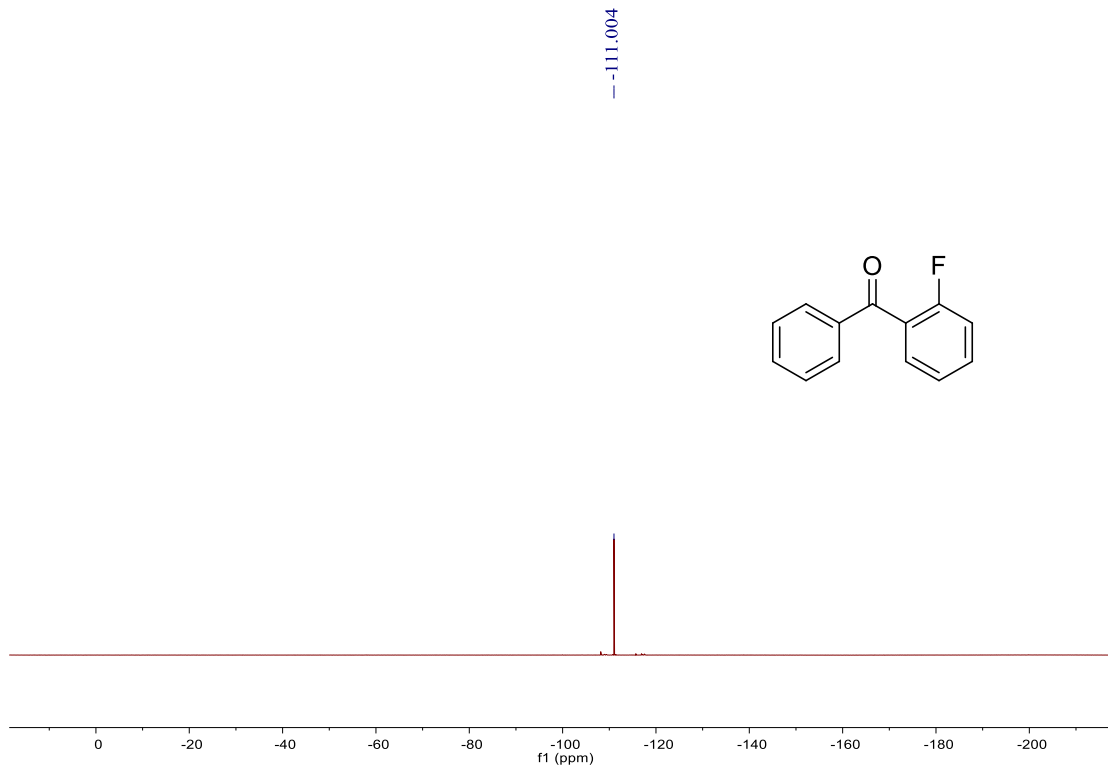

**<sup>1</sup>H & <sup>13</sup>C & <sup>19</sup>F NMR of 2i**

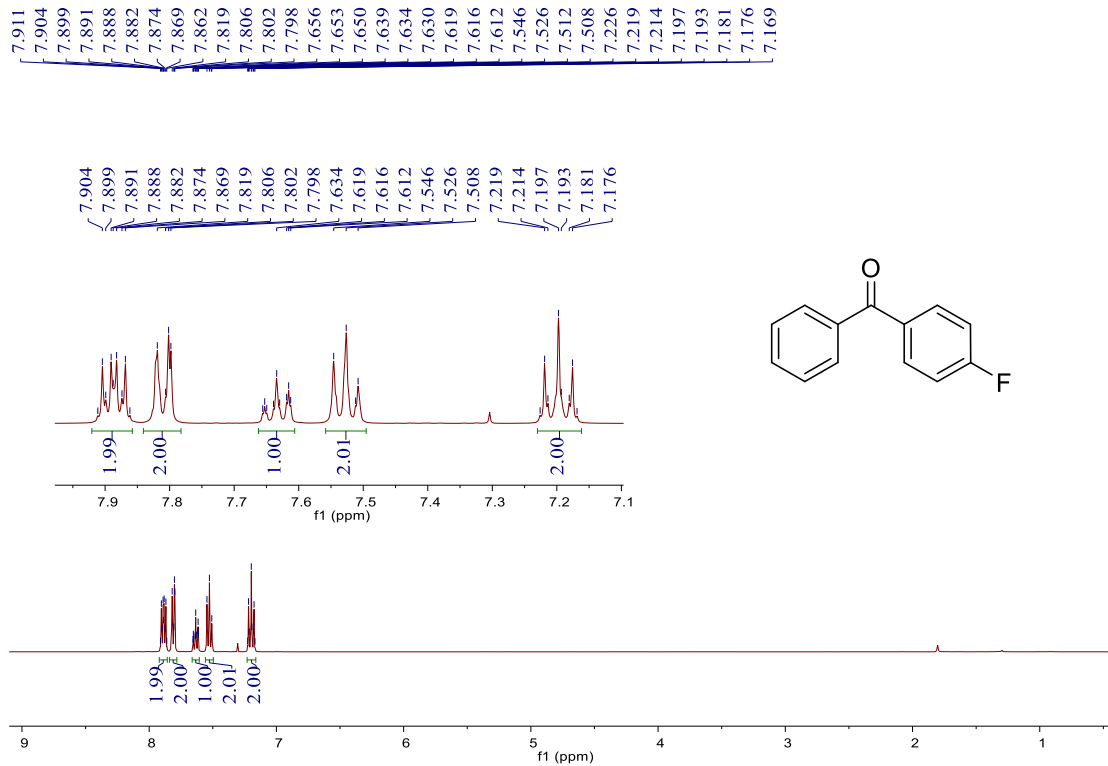

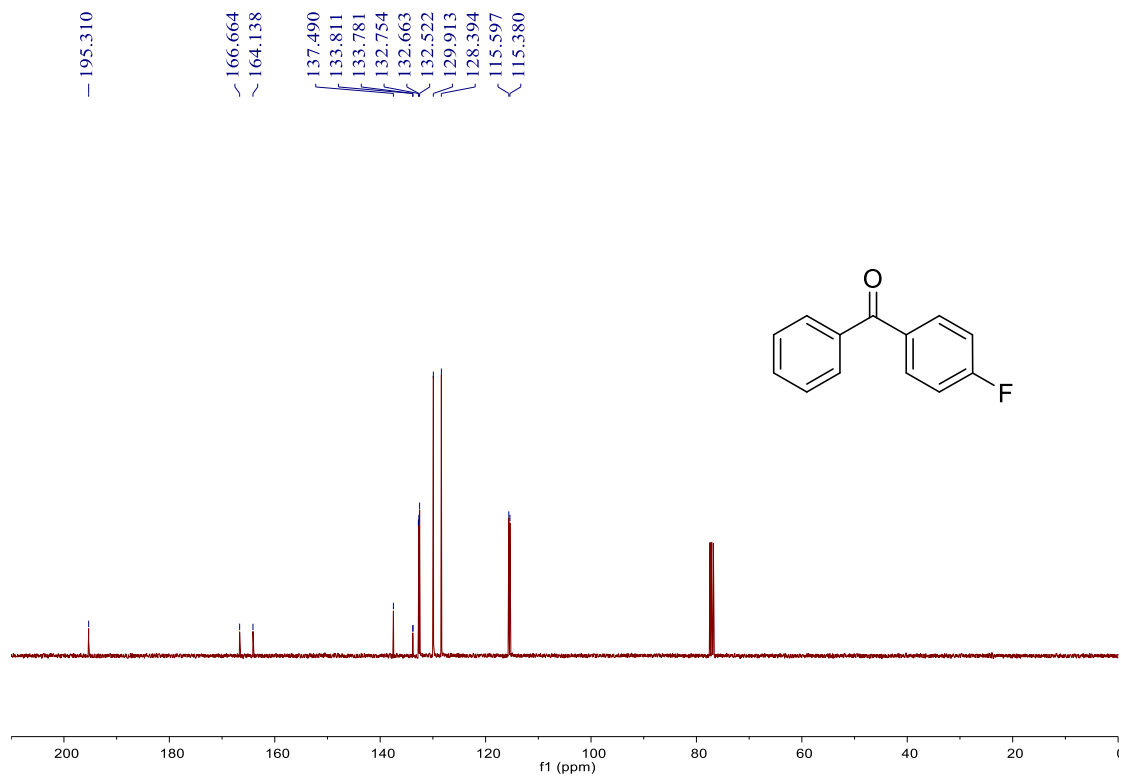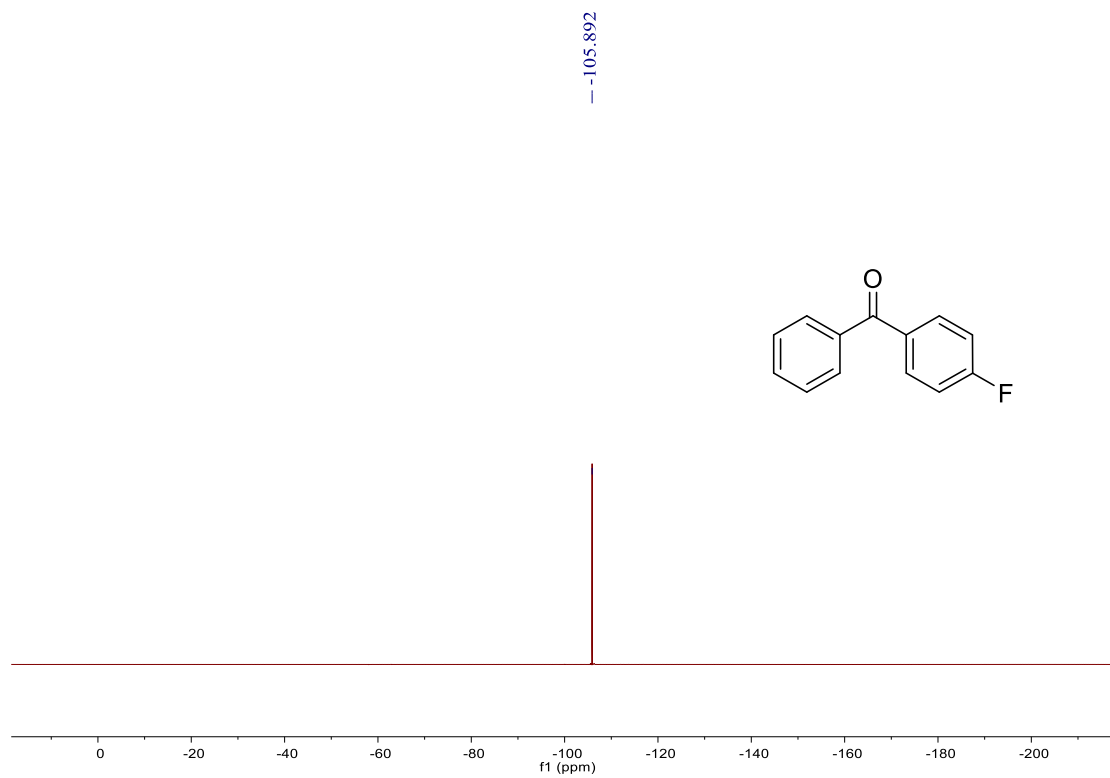

# $^1\text{H}$ & $^{13}\text{C}$ NMR of 2j

7.874  
7.871  
7.854  
7.850  
7.850  
7.850  
7.871  
7.854  
7.672  
7.669  
7.666  
7.650  
7.650  
7.635  
7.632  
7.632  
7.534  
7.525  
7.525  
7.514  
7.514  
7.504  
7.504  
7.495  
7.483  
7.472  
7.463  
7.463  
7.437  
7.429  
7.429  
7.426  
7.426  
7.420  
7.420  
7.419  
7.419  
7.412  
7.412  
7.304

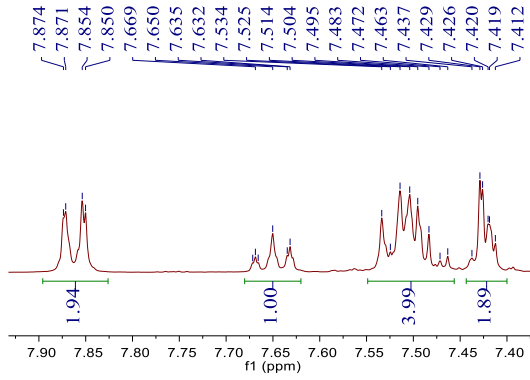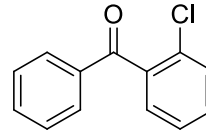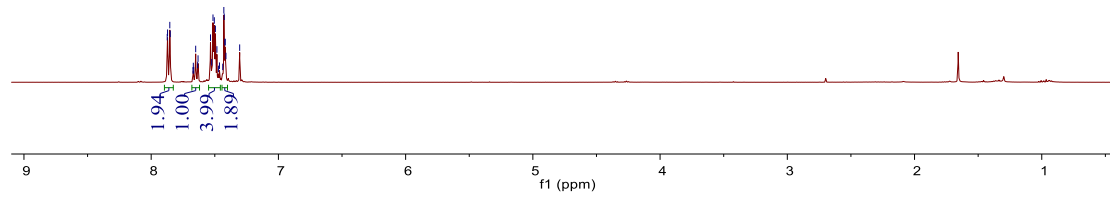

— 195.359

138.607  
136.468  
133.761  
131.329  
131.173  
130.123  
130.108  
129.154  
128.654  
126.721

— 77.386

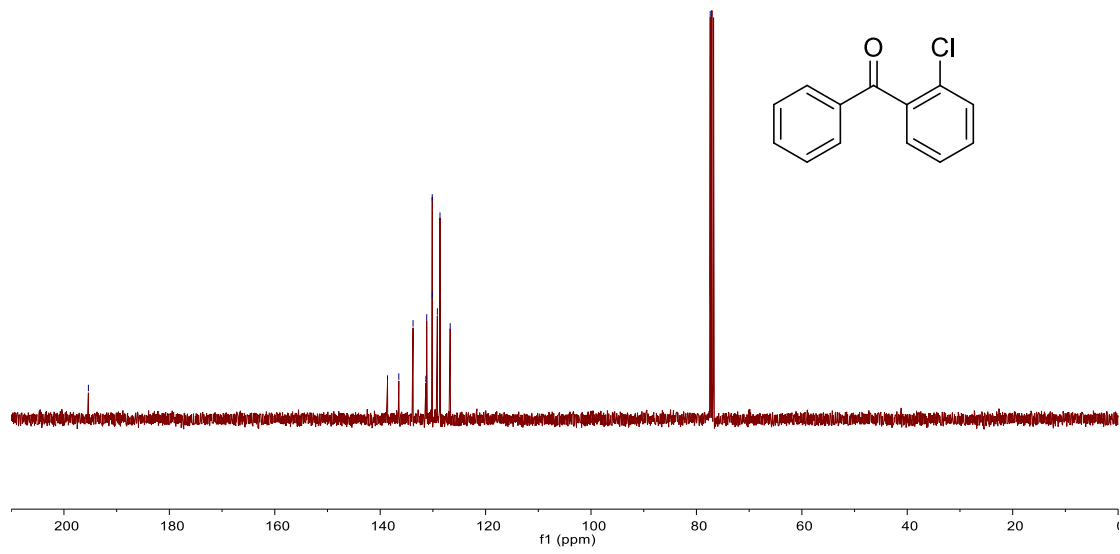

# $^1\text{H}$ & $^{13}\text{C}$ NMR of 2k

7.831  
7.829  
7.820  
7.814  
7.811  
7.808  
7.798  
7.793  
7.787  
7.672  
7.669  
7.665  
7.655  
7.650  
7.645  
7.634  
7.631  
7.628  
7.557  
7.537  
7.519  
7.503  
7.498  
7.492

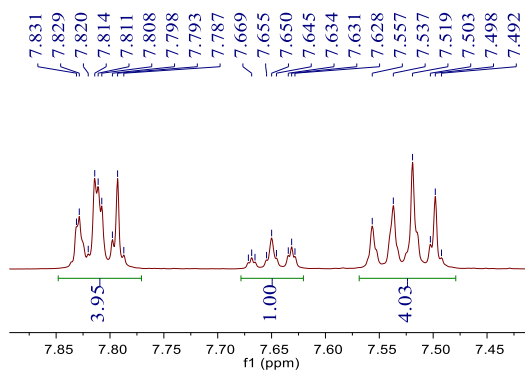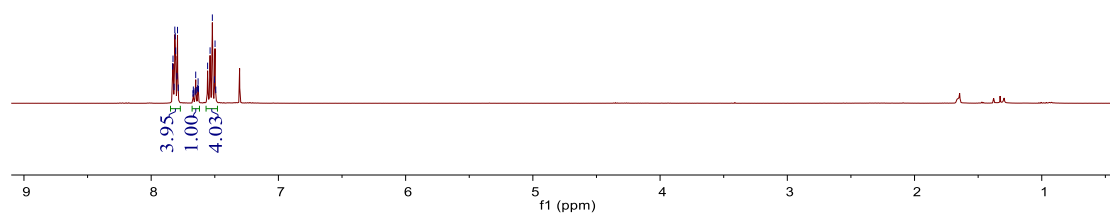

— 195.559

138.927  
137.242  
135.868  
132.692  
131.505  
129.969  
128.669  
128.439

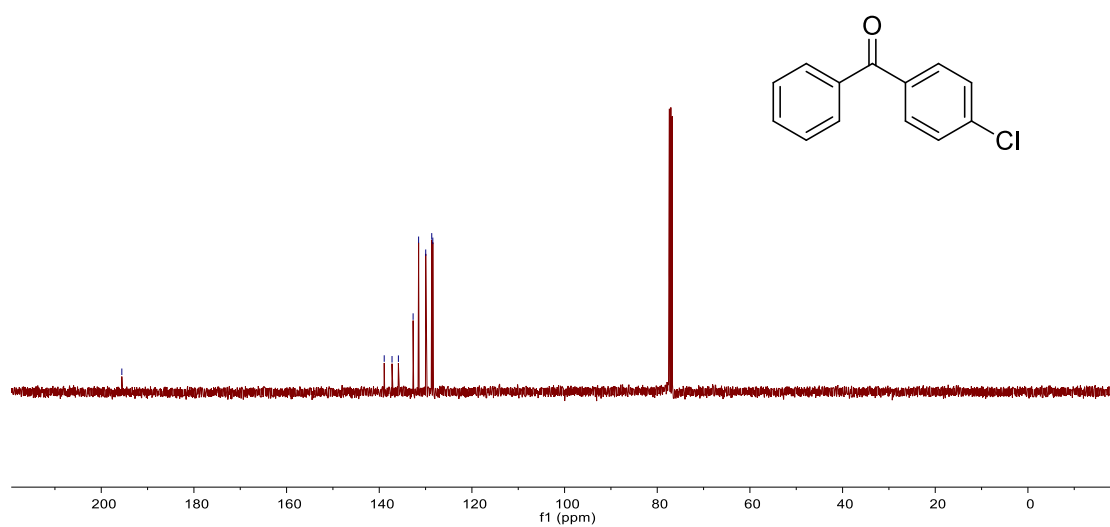

# $^1\text{H}$ & $^{13}\text{C}$ NMR of 2l

7.871  
7.858  
7.853  
7.850  
7.709  
7.706  
7.690  
7.686  
7.674  
7.671  
7.668  
7.653  
7.637  
7.634  
7.631  
7.534  
7.514  
7.495  
7.489  
7.499  
7.470  
7.489  
7.486  
7.470  
7.466  
7.452  
7.449  
7.425  
7.420  
7.406  
7.402  
7.384

7.871  
7.858  
7.853  
7.850  
7.709  
7.706  
7.690  
7.686  
7.653  
7.637  
7.634  
7.534  
7.514  
7.495  
7.489  
7.470  
7.466  
7.452  
7.449  
7.425  
7.420  
7.406  
7.402  
7.384

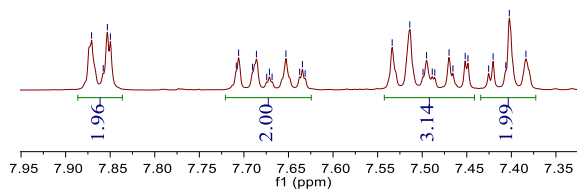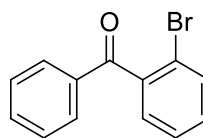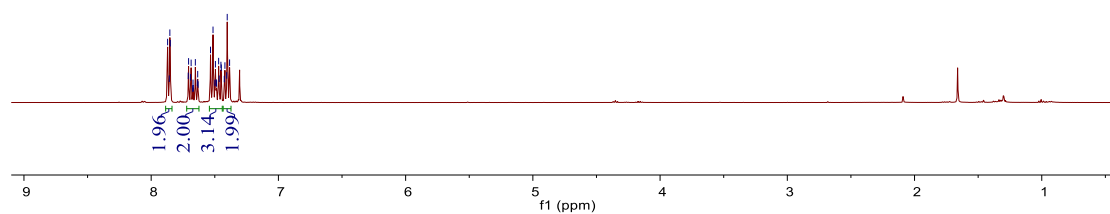

195.950

140.673  
136.112  
133.794  
133.226  
131.201  
130.267  
129.016  
128.677  
127.237  
119.552

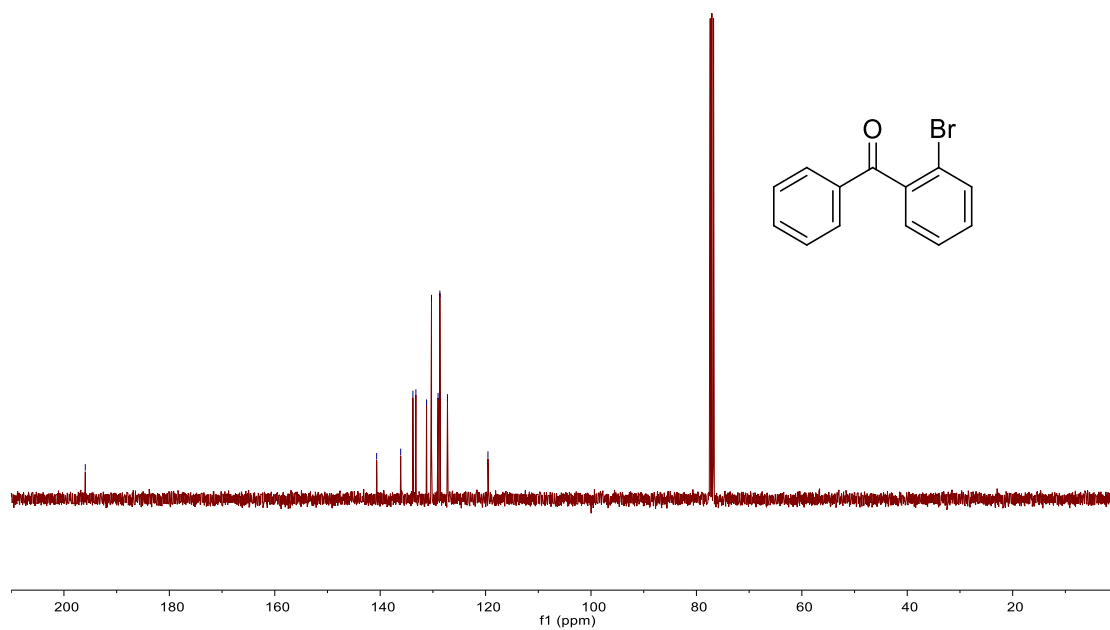

# $^1\text{H}$ & $^{13}\text{C}$ & $^{19}\text{F}$ NMR of 2m

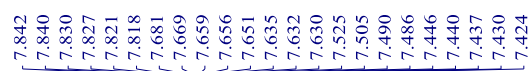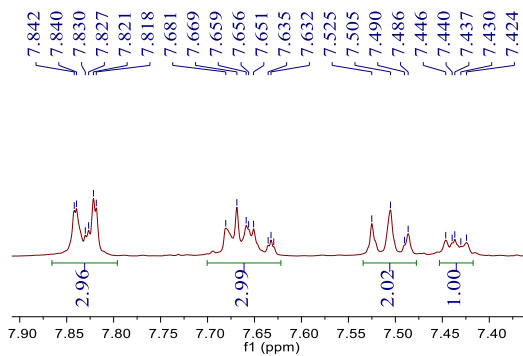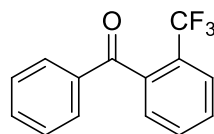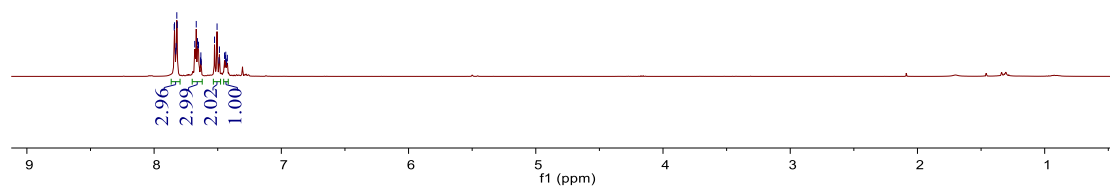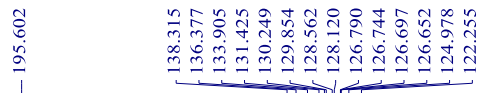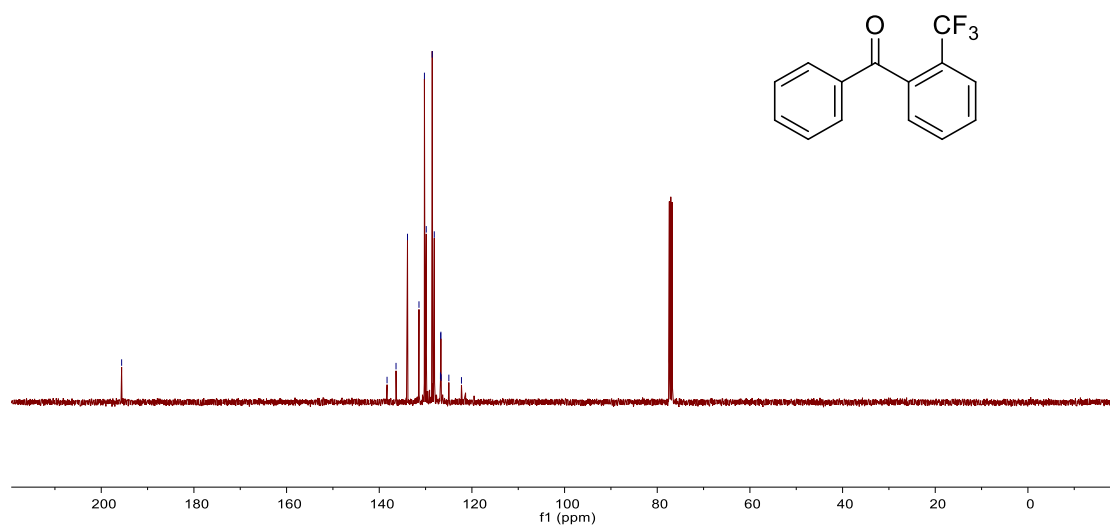

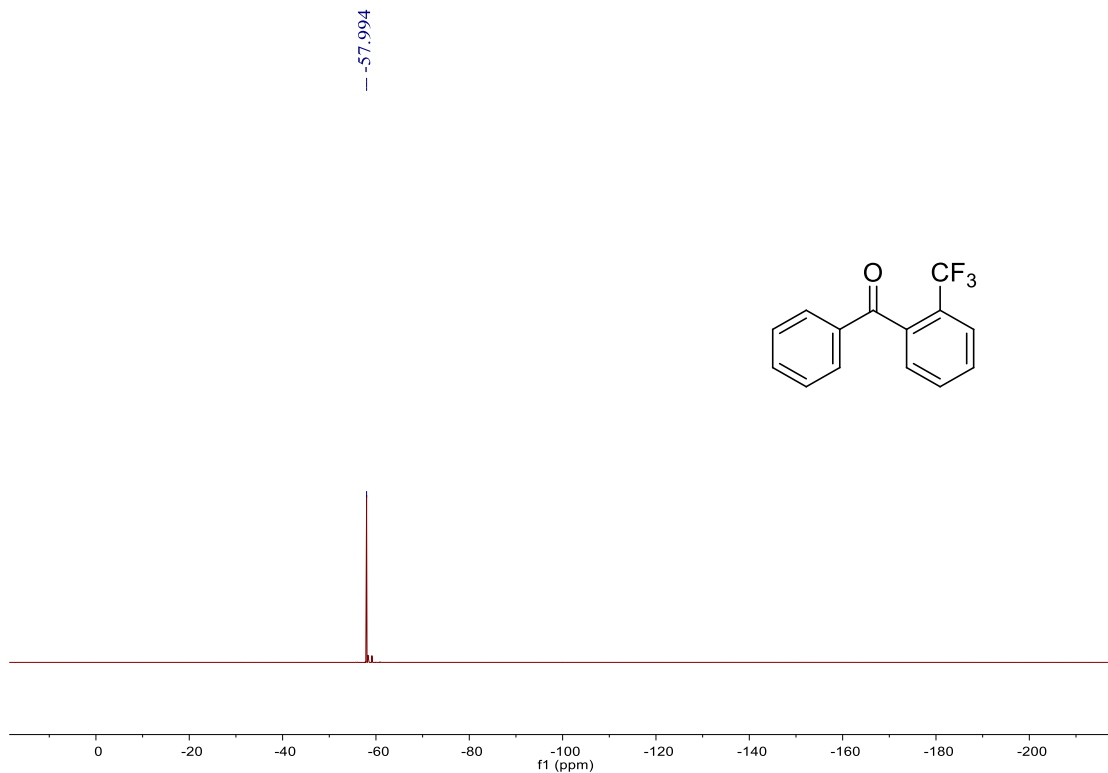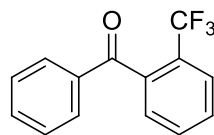

**<sup>1</sup>H & <sup>13</sup>C & <sup>19</sup>F NMR of 2n**

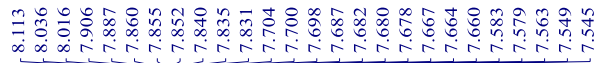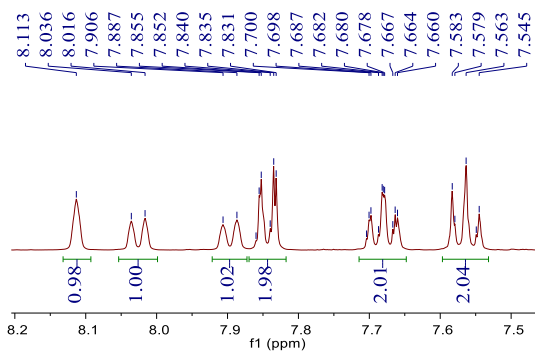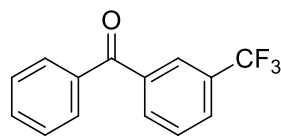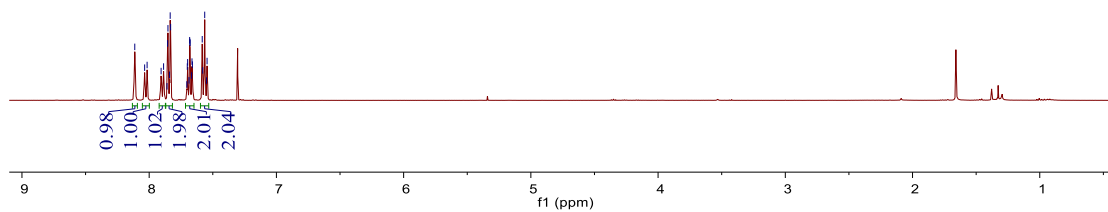



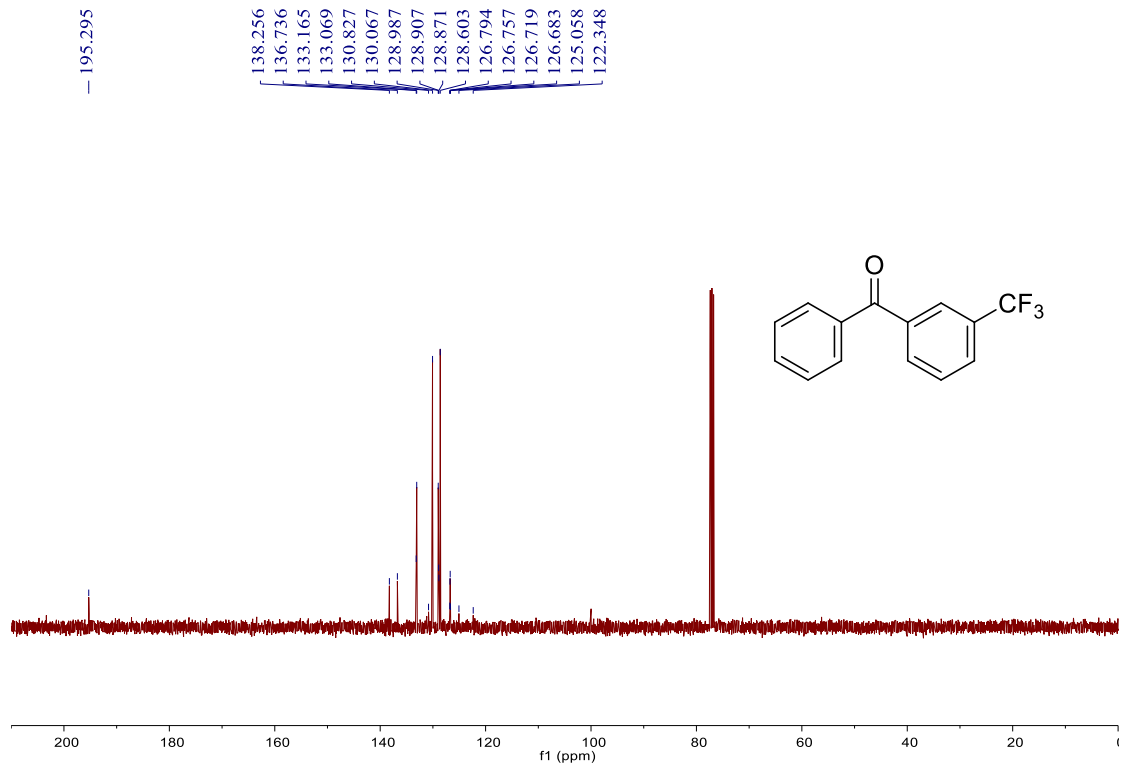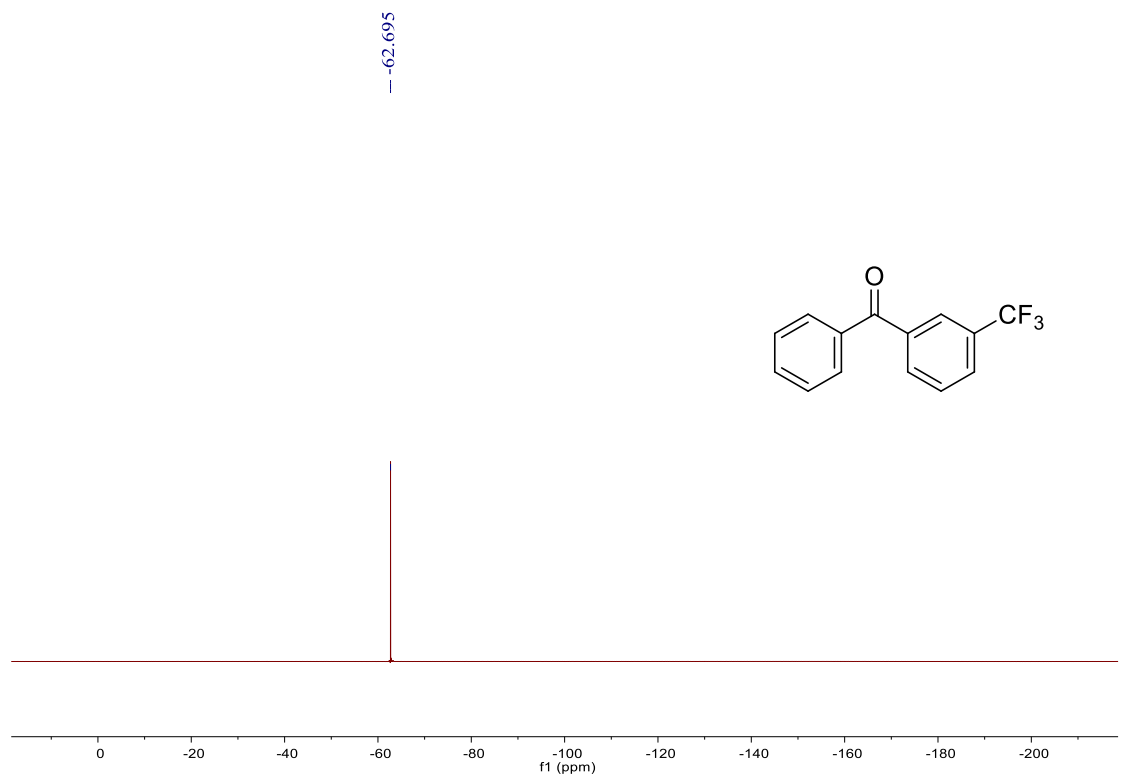

# $^1\text{H}$ & $^{13}\text{C}$ NMR of 2o

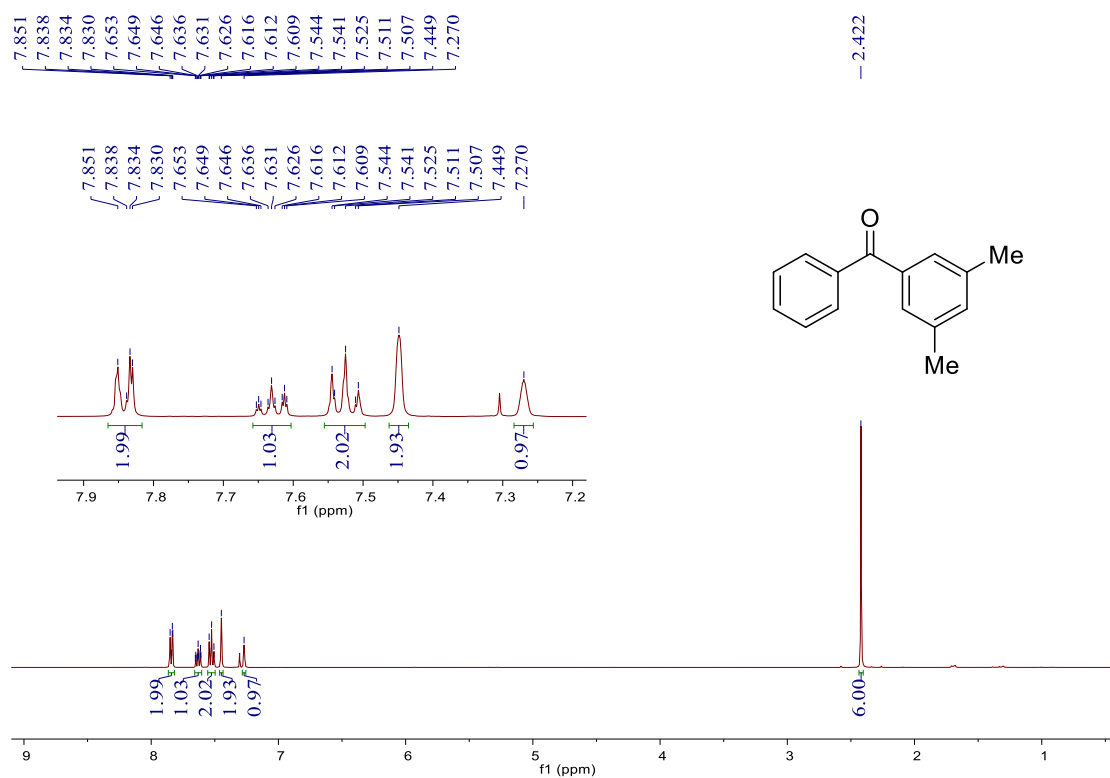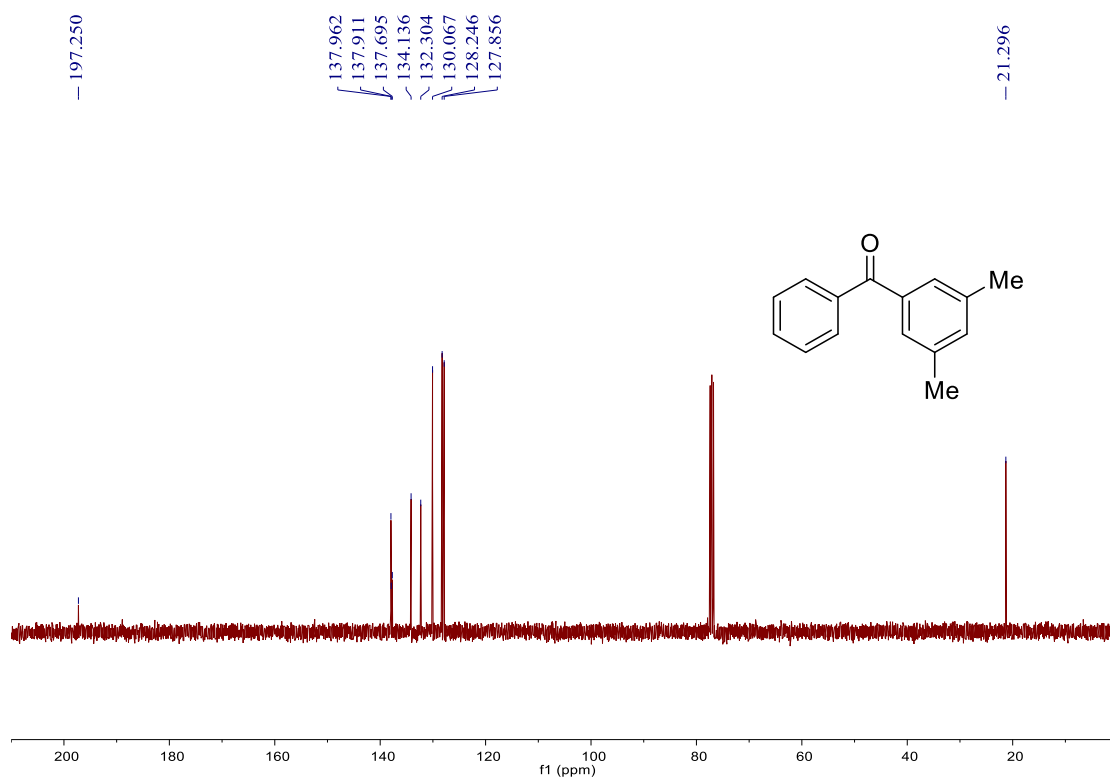

**$^1\text{H}$  &  $^{13}\text{C}$  &  $^{19}\text{F}$  NMR of 2p**

7.866  
7.863  
7.848  
7.845  
7.842  
7.845  
7.848  
7.842  
7.676  
7.673  
7.670  
7.659  
7.673  
7.655  
7.639  
7.636  
7.618  
7.544  
7.618  
7.525  
7.510  
7.506  
7.506  
7.075  
7.053  
7.051  
7.069  
7.067  
7.067  
7.053  
6.979  
6.957  
6.954  
6.951  
6.949  
6.932  
6.932  
7.028  
7.026  
6.979  
6.973  
6.957  
6.954  
6.951  
6.949  
6.932  
6.926

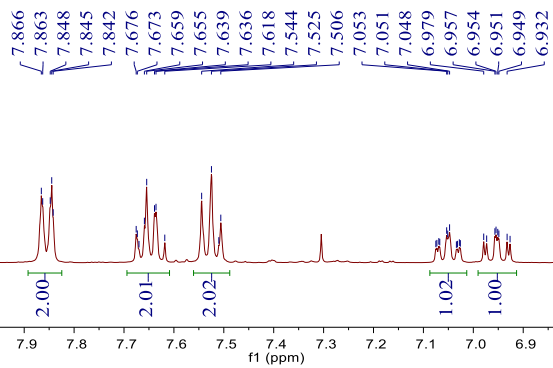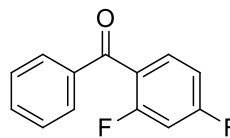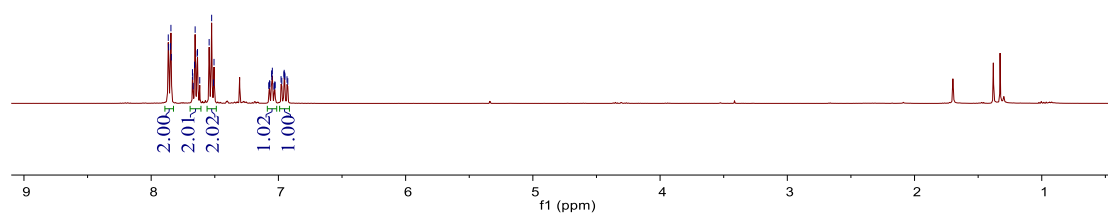

192.356  
166.245  
166.129  
163.714  
163.597  
162.289  
162.166  
159.745  
159.622  
137.392  
133.519  
132.659  
132.616  
132.557  
132.514  
129.732  
128.547  
123.444  
123.406  
123.299  
123.260  
112.038  
112.001  
111.824  
111.787  
104.974  
104.720  
104.466

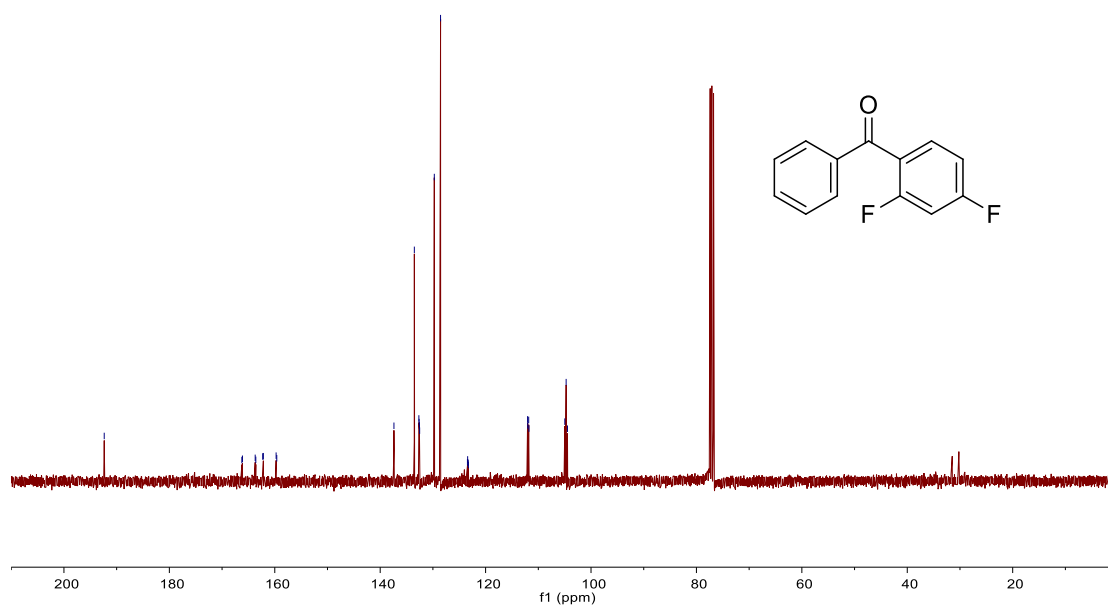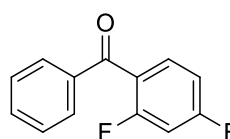

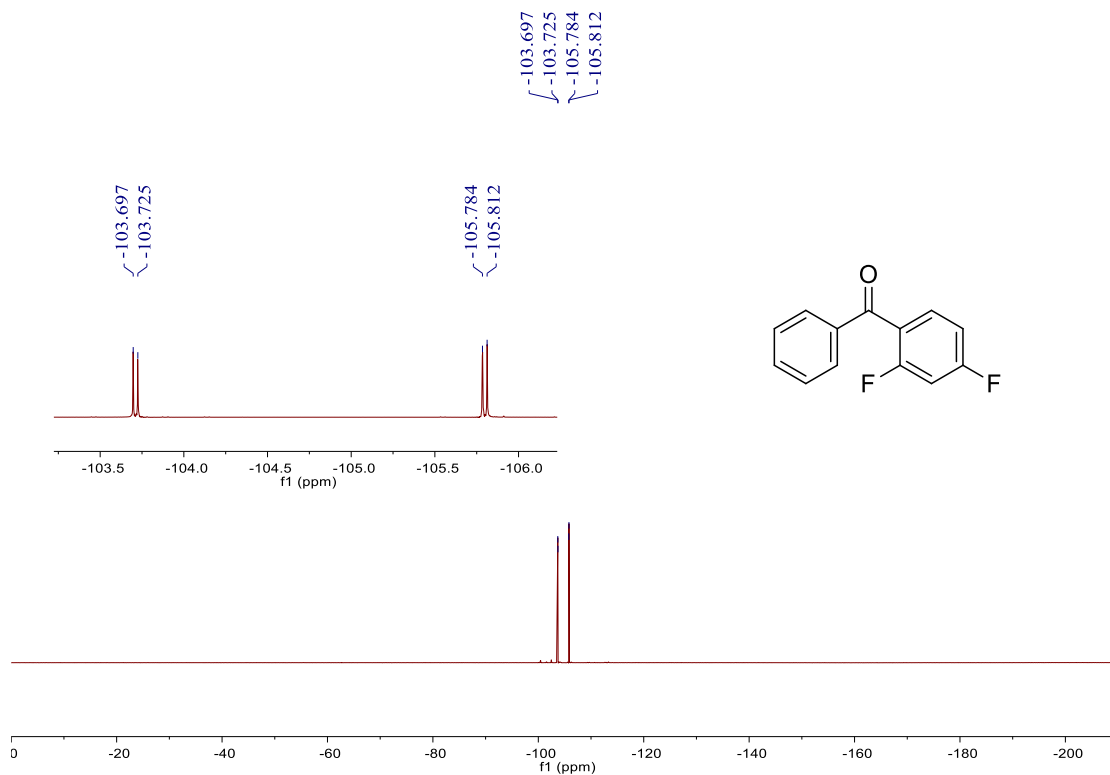

### $^1\text{H}$ & $^{13}\text{C}$ NMR of 2q

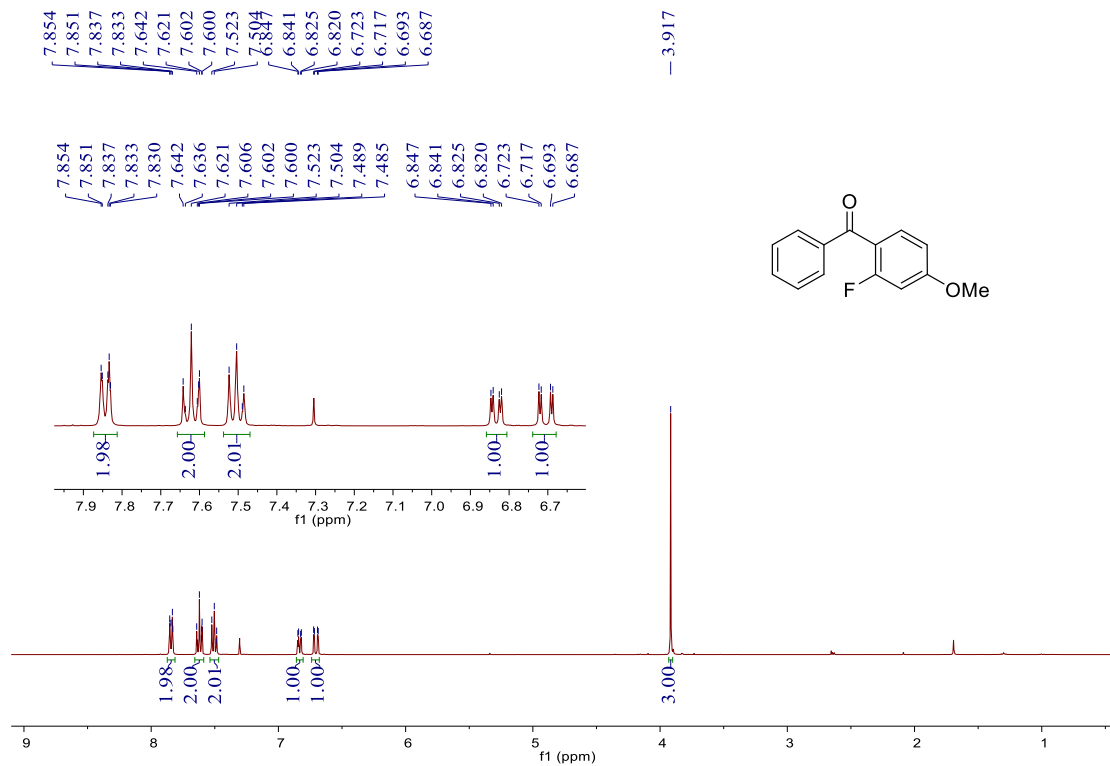

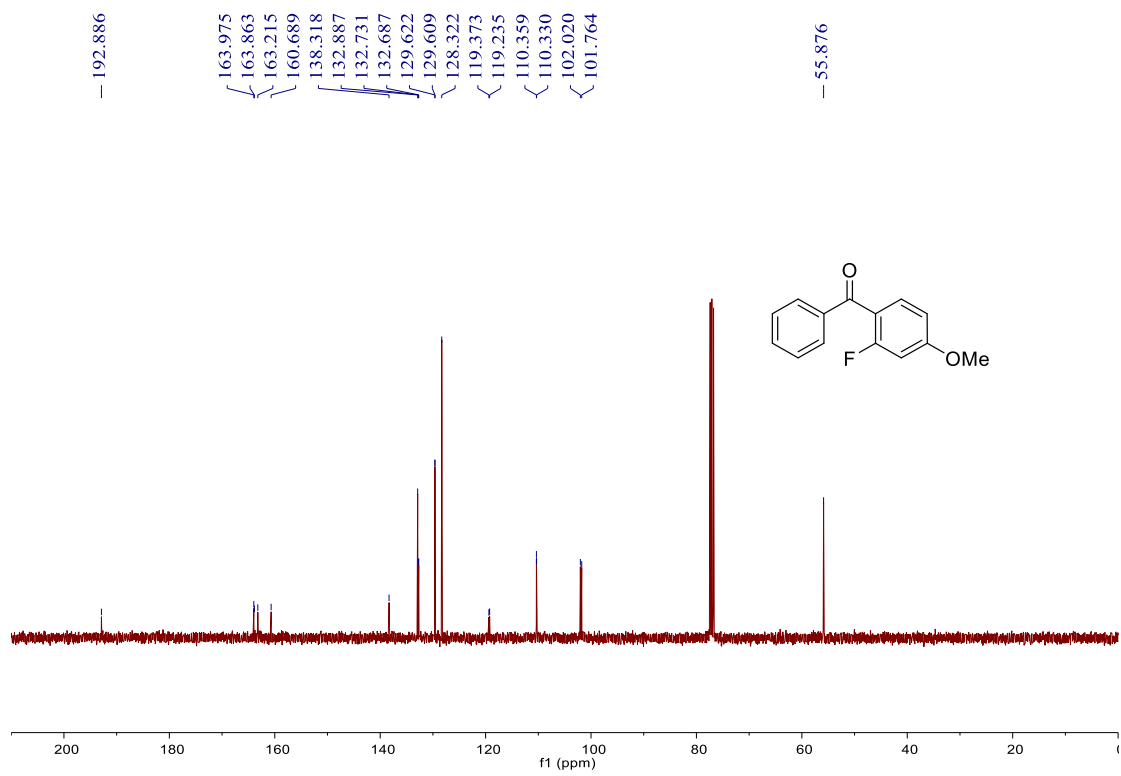

**$^1\text{H}$  &  $^{13}\text{C}$  &  $^{19}\text{F}$  NMR of 2r**

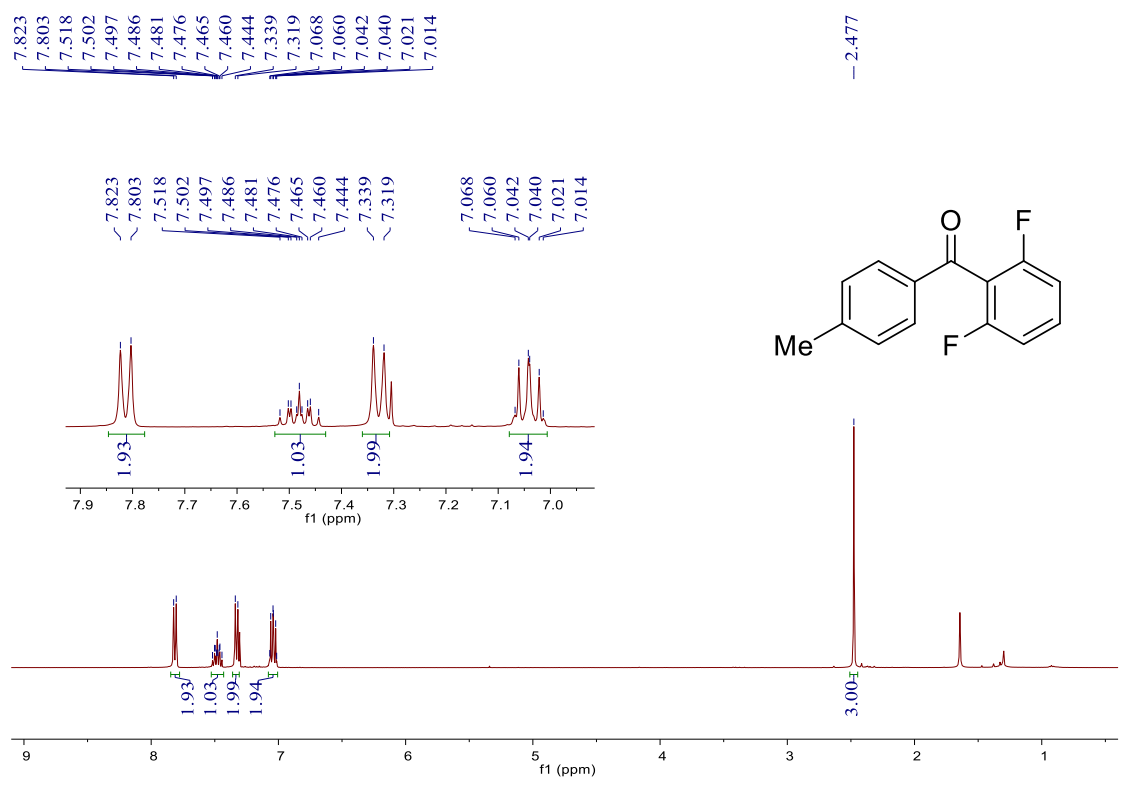

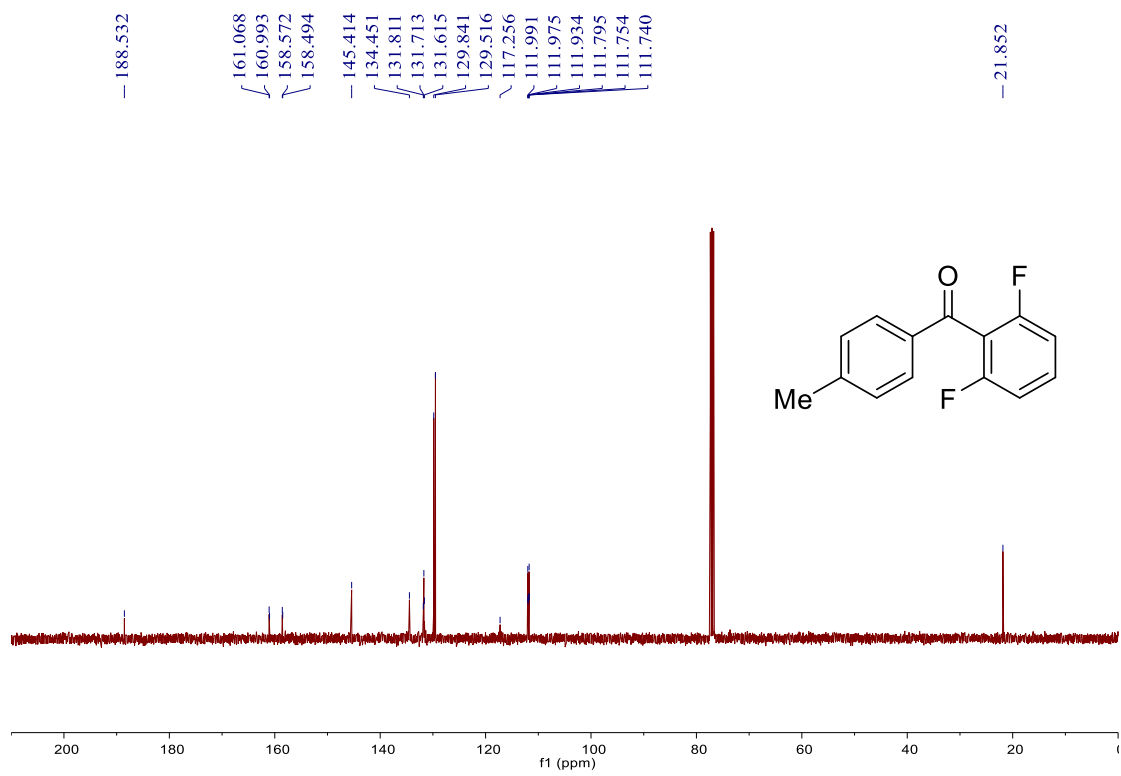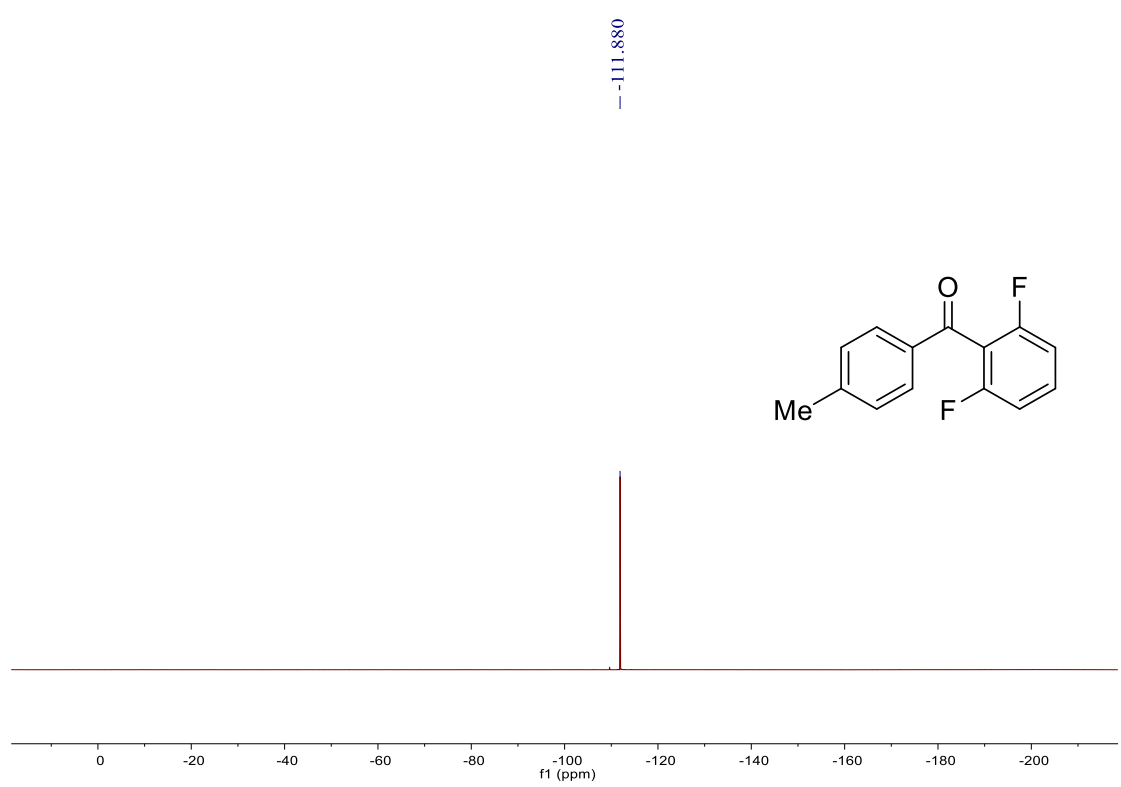

# $^1\text{H}$ & $^{13}\text{C}$ NMR of 2s

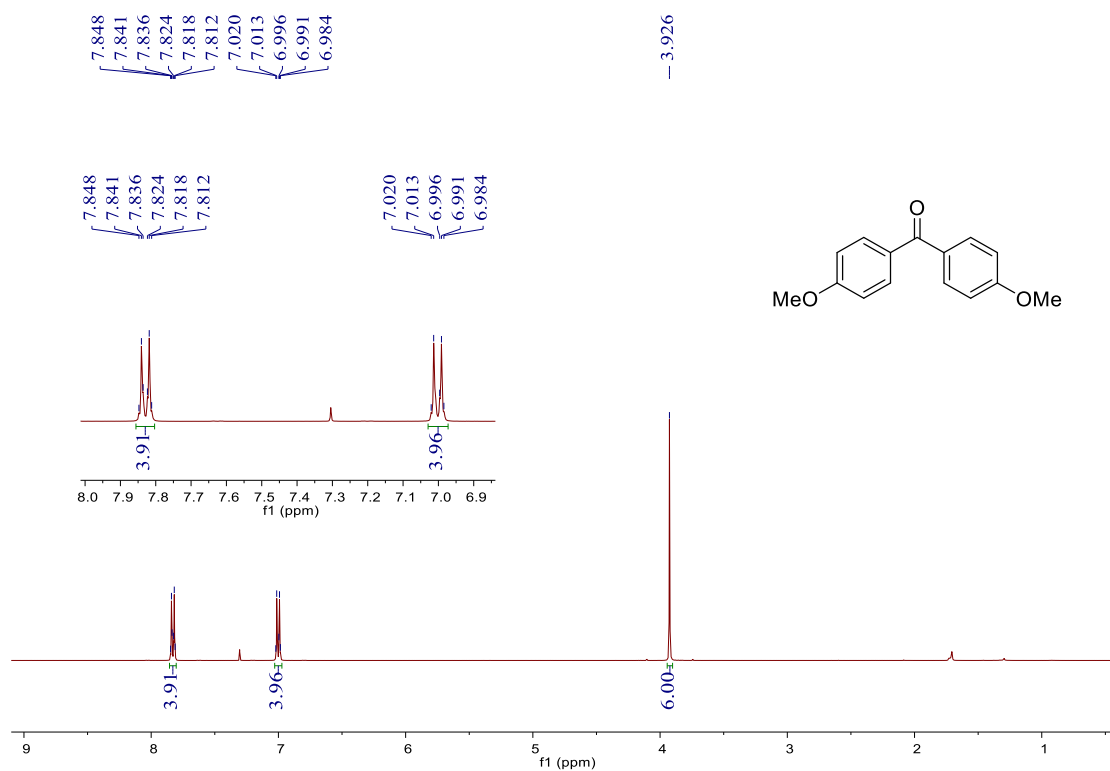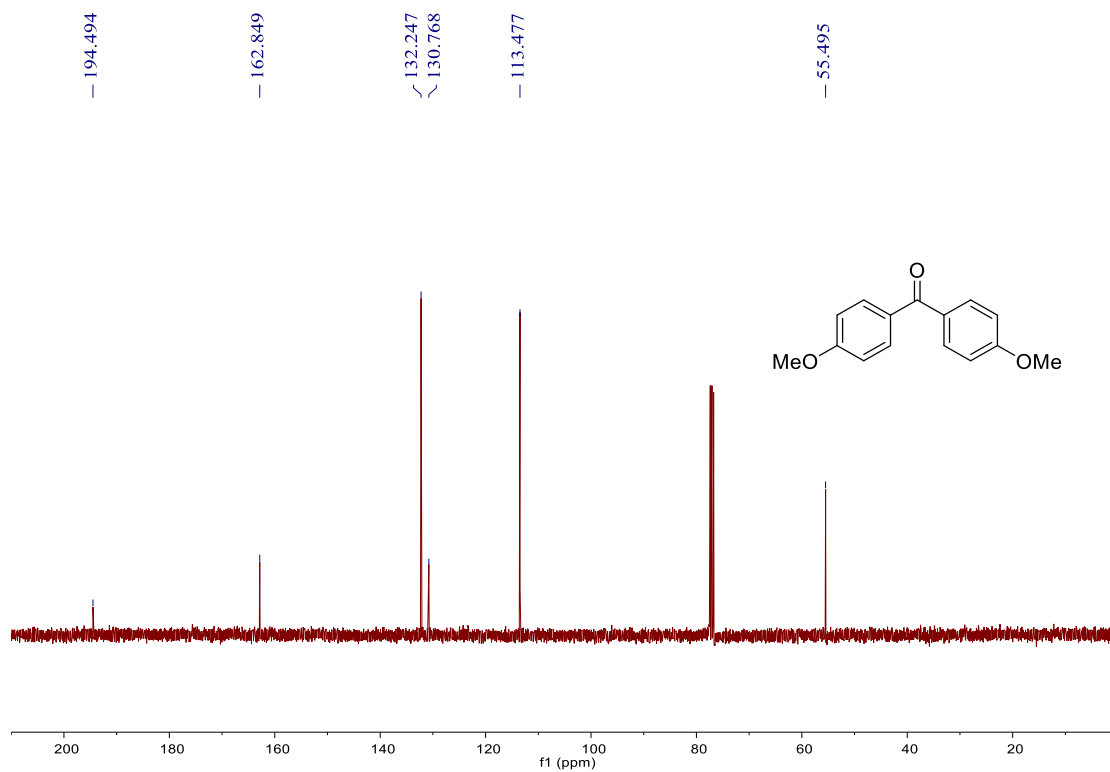

# $^1\text{H}$ & $^{13}\text{C}$ & $^{19}\text{F}$ NMR of 2t

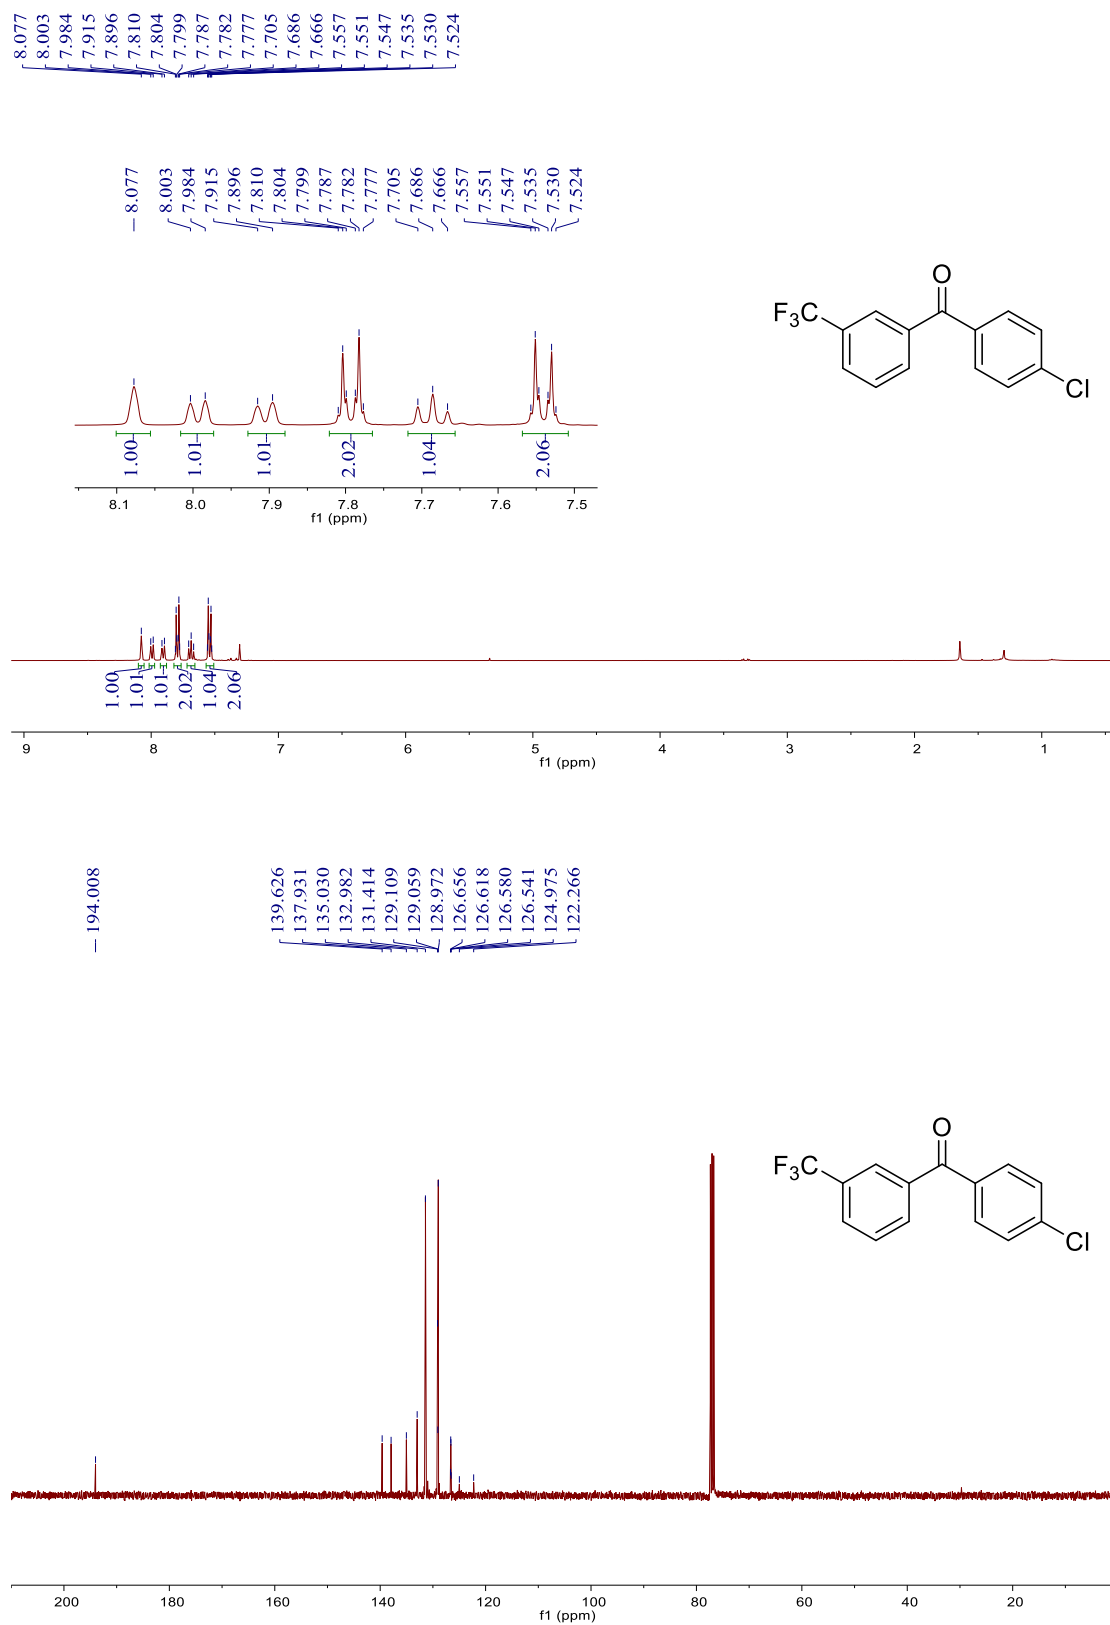



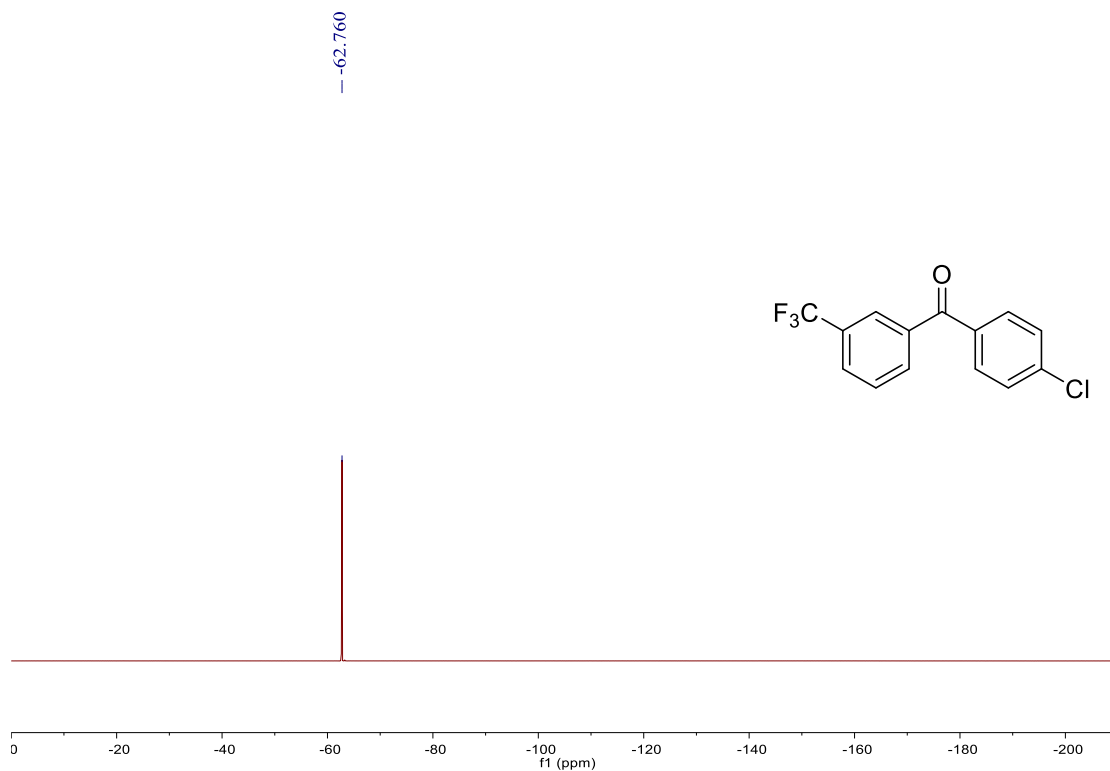

**<sup>1</sup>H & <sup>13</sup>C NMR of 2u**

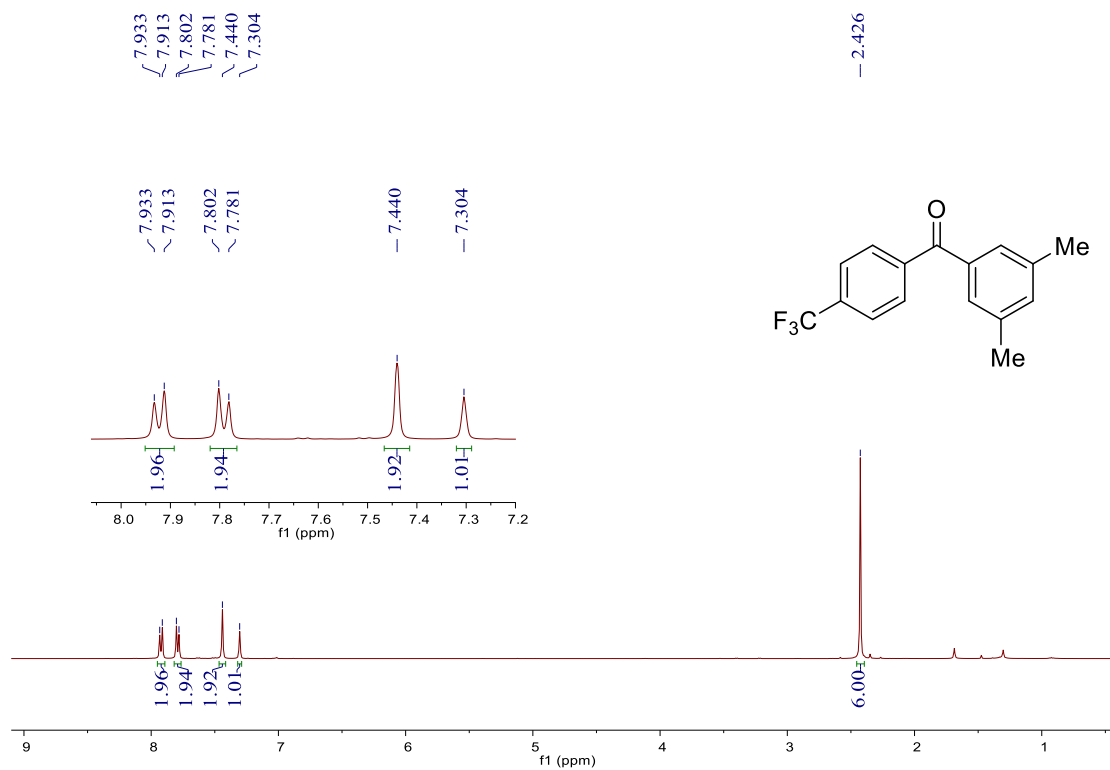

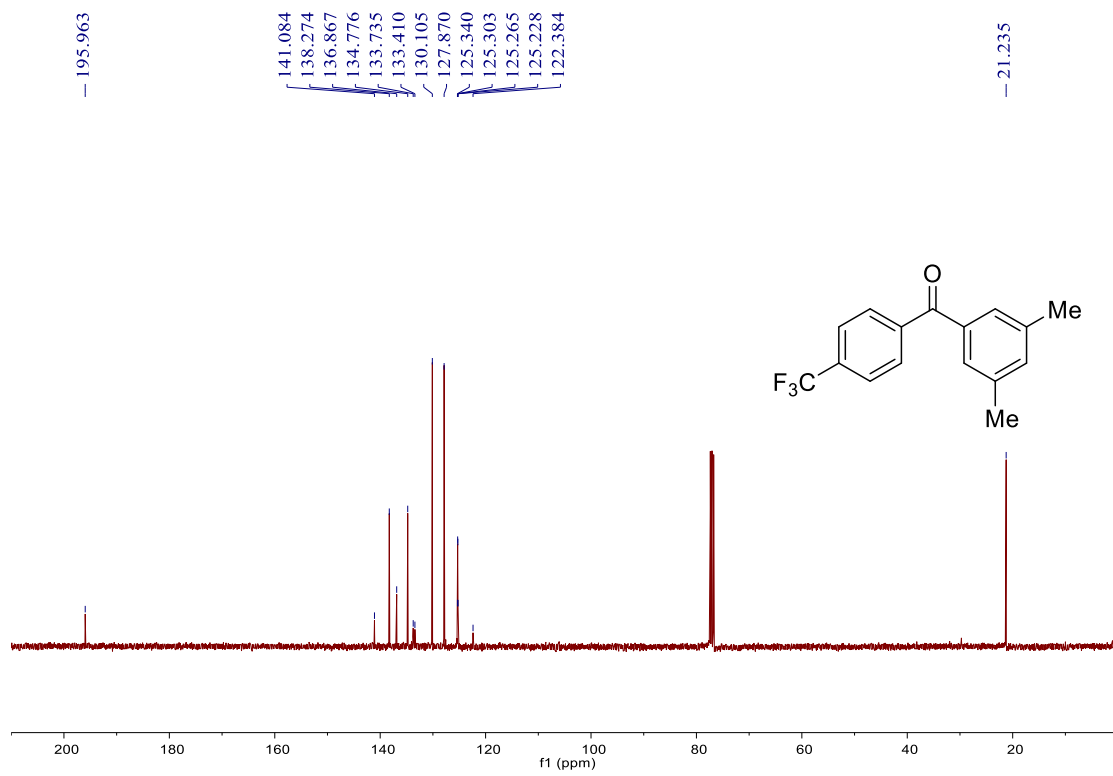

**<sup>1</sup>H & <sup>13</sup>C NMR of 2v**

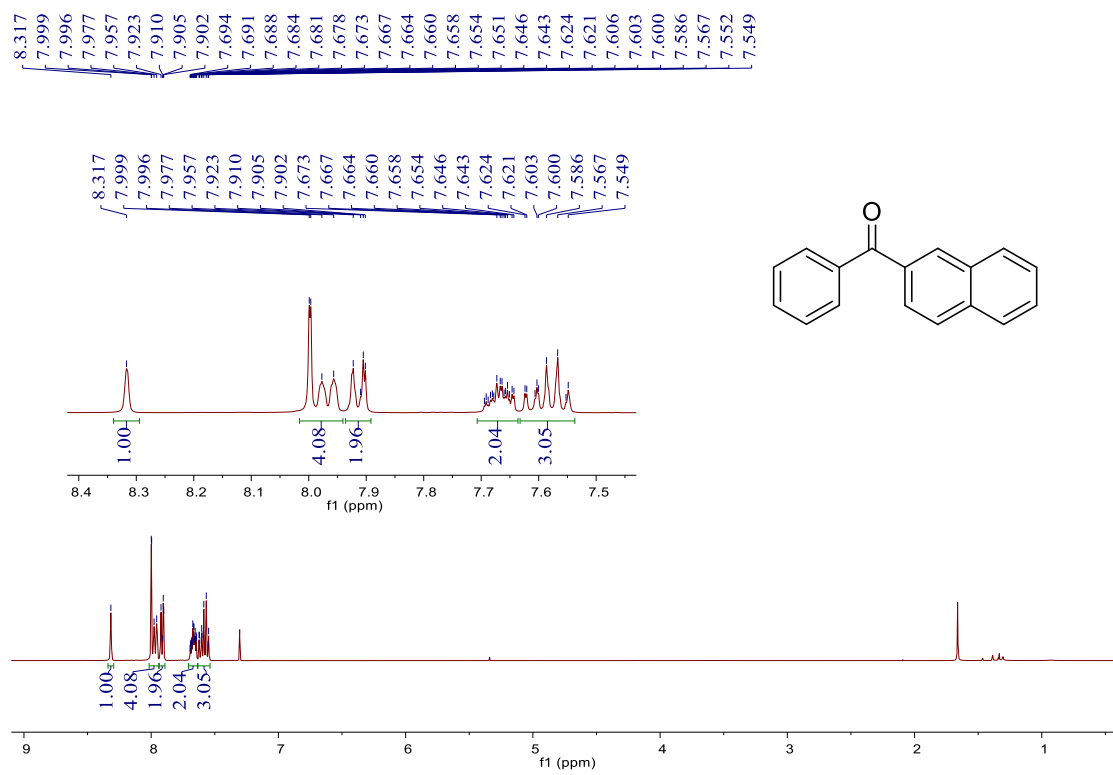

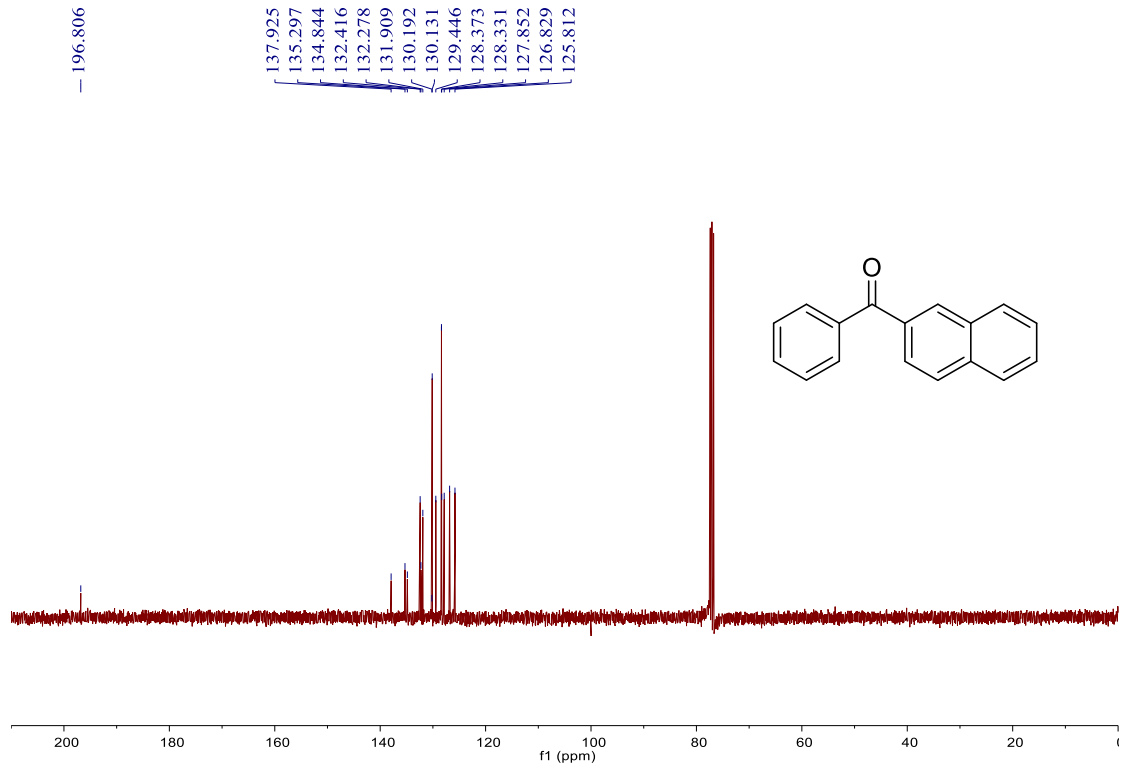

**<sup>1</sup>H & <sup>13</sup>C NMR of 2w**

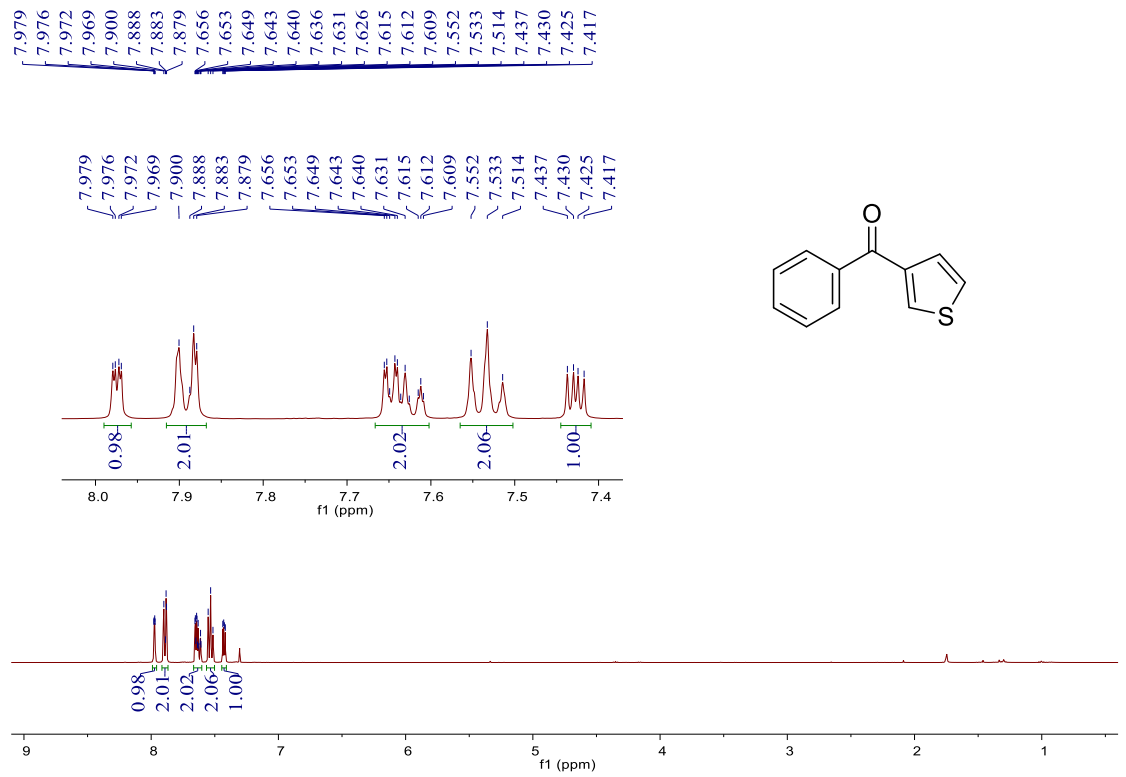

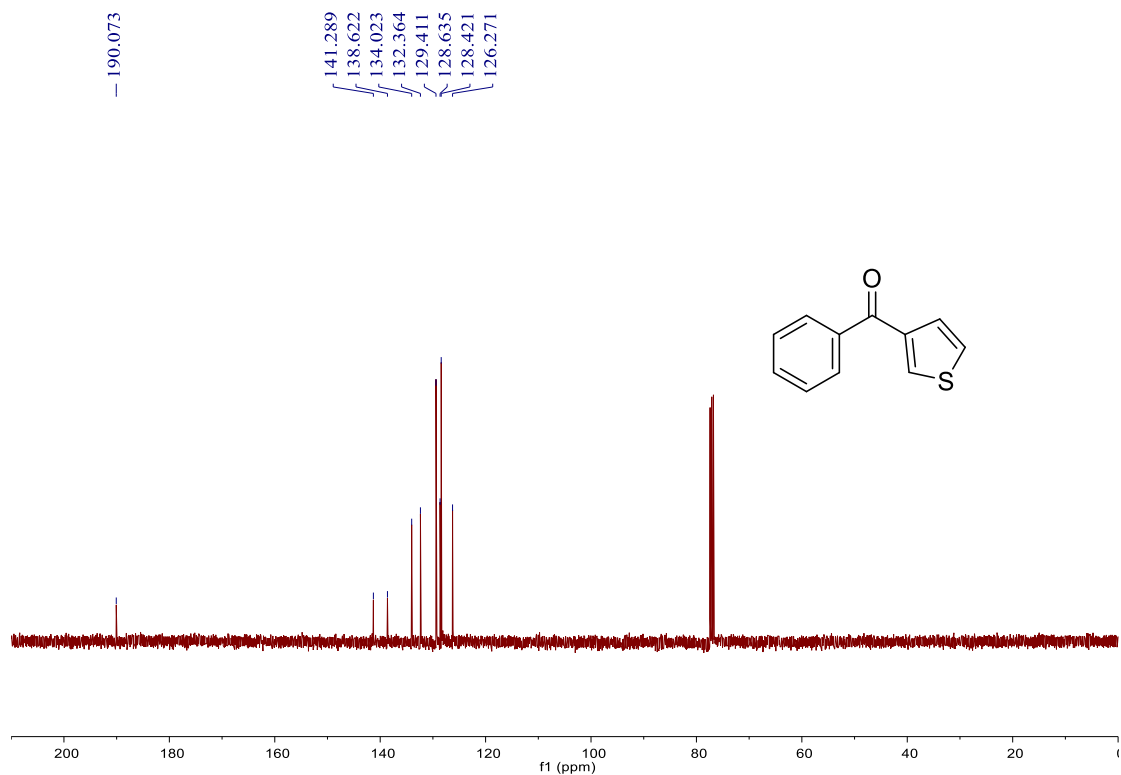

**<sup>1</sup>H & <sup>13</sup>C NMR of 2x**

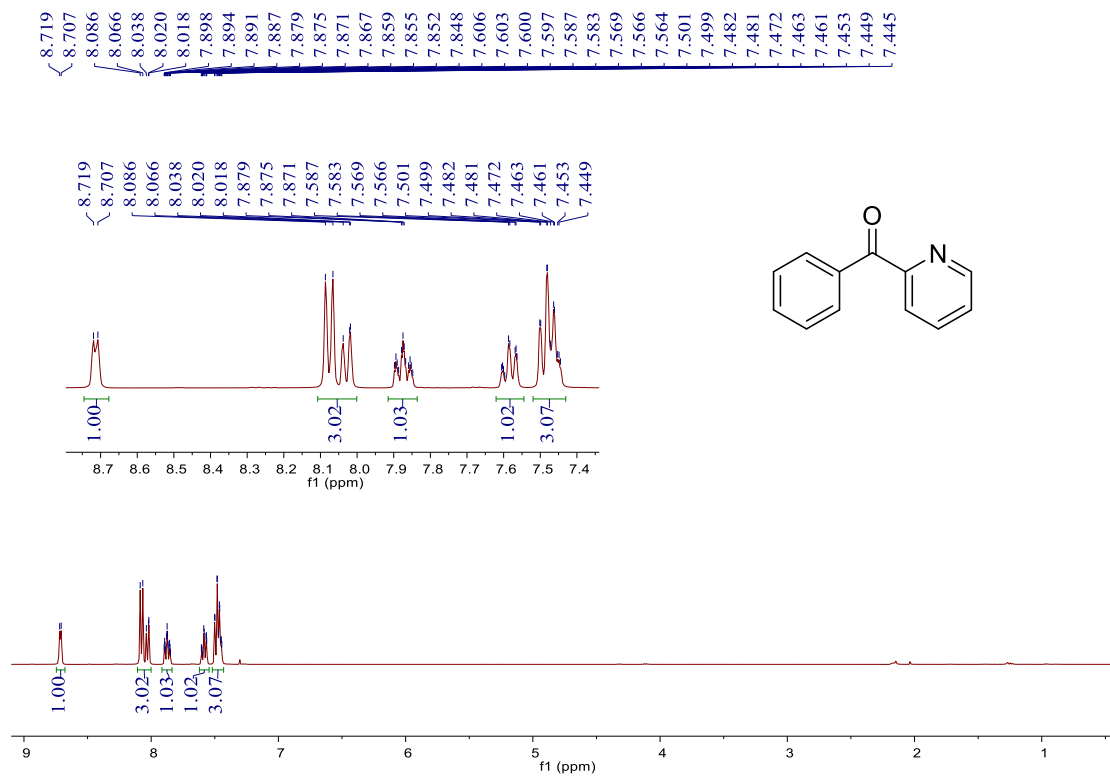

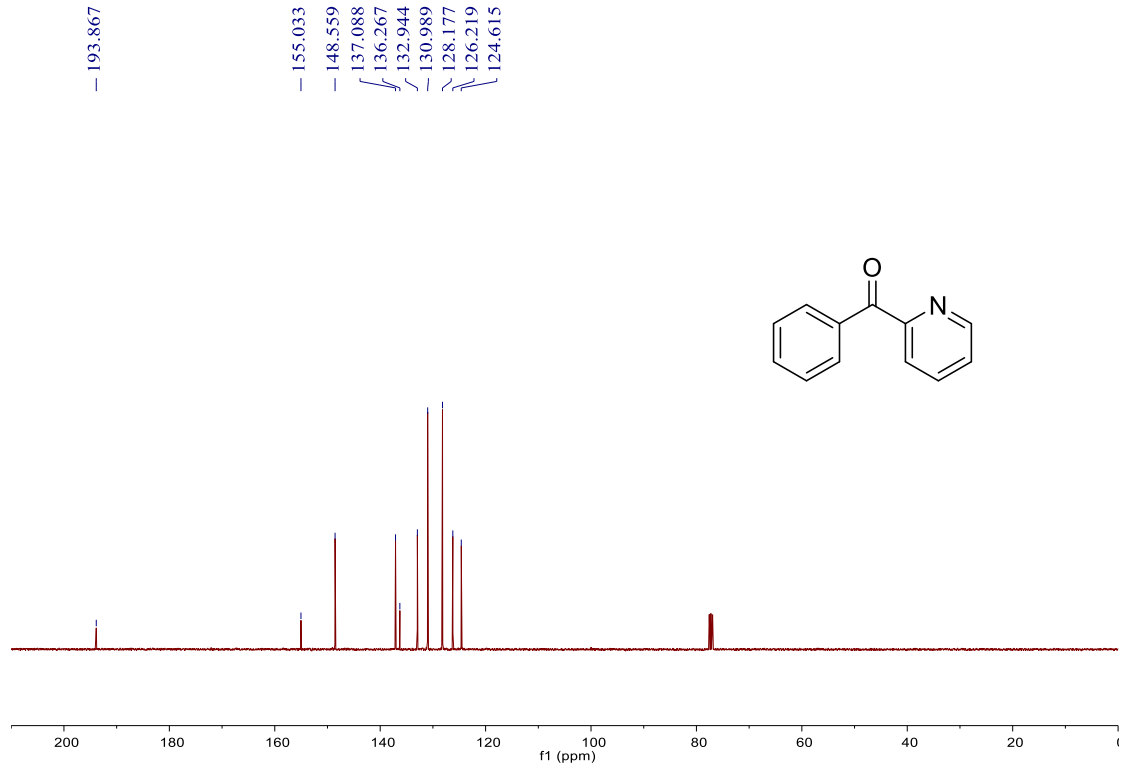

### <sup>1</sup>H & <sup>13</sup>C NMR of 2y

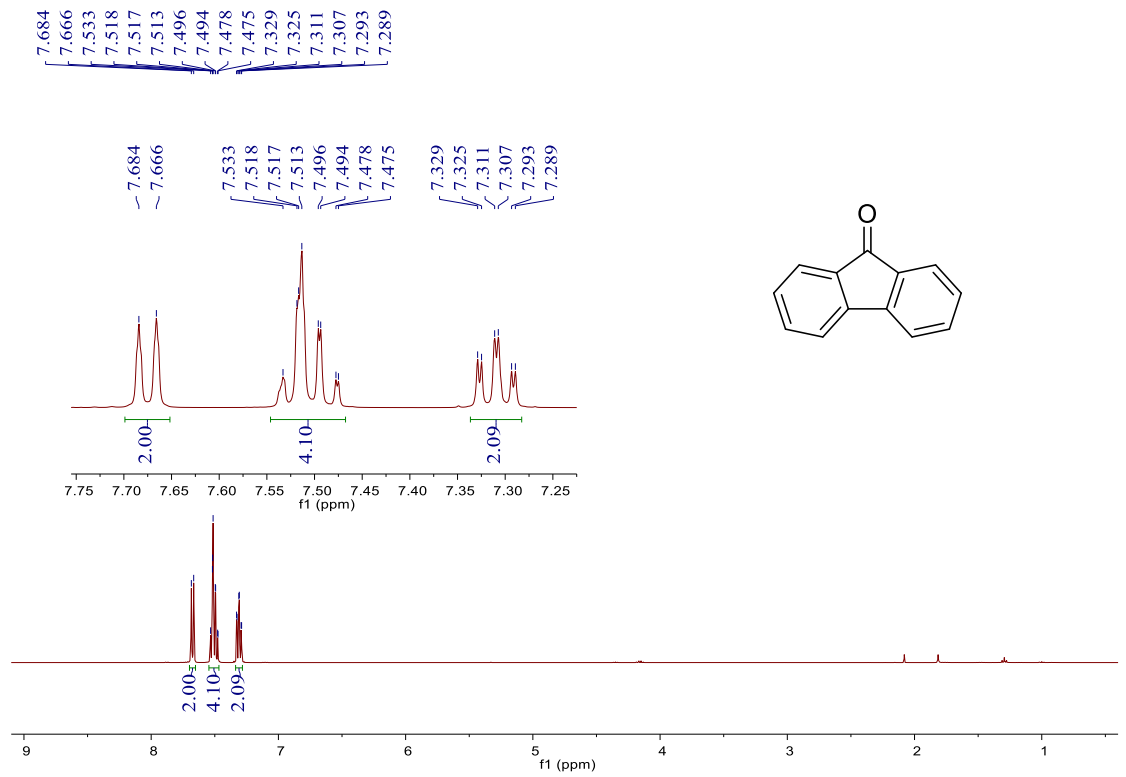

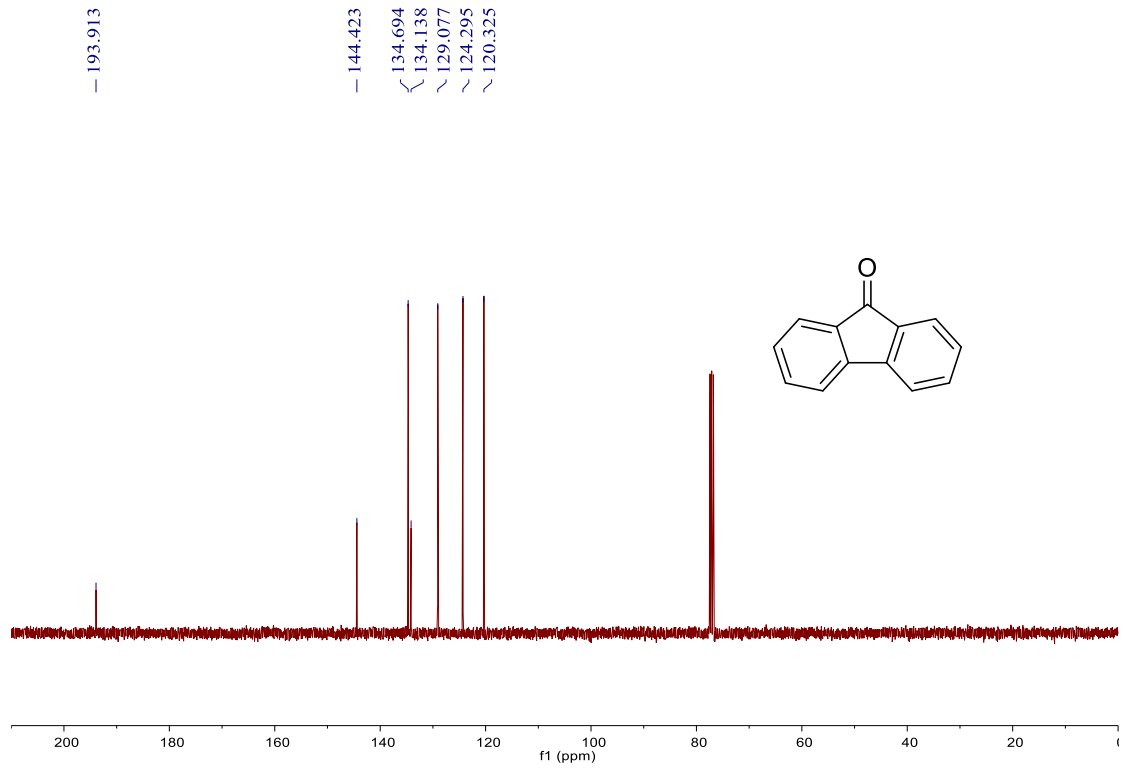

**$^1\text{H}$  &  $^{13}\text{C}$  NMR of 2z**

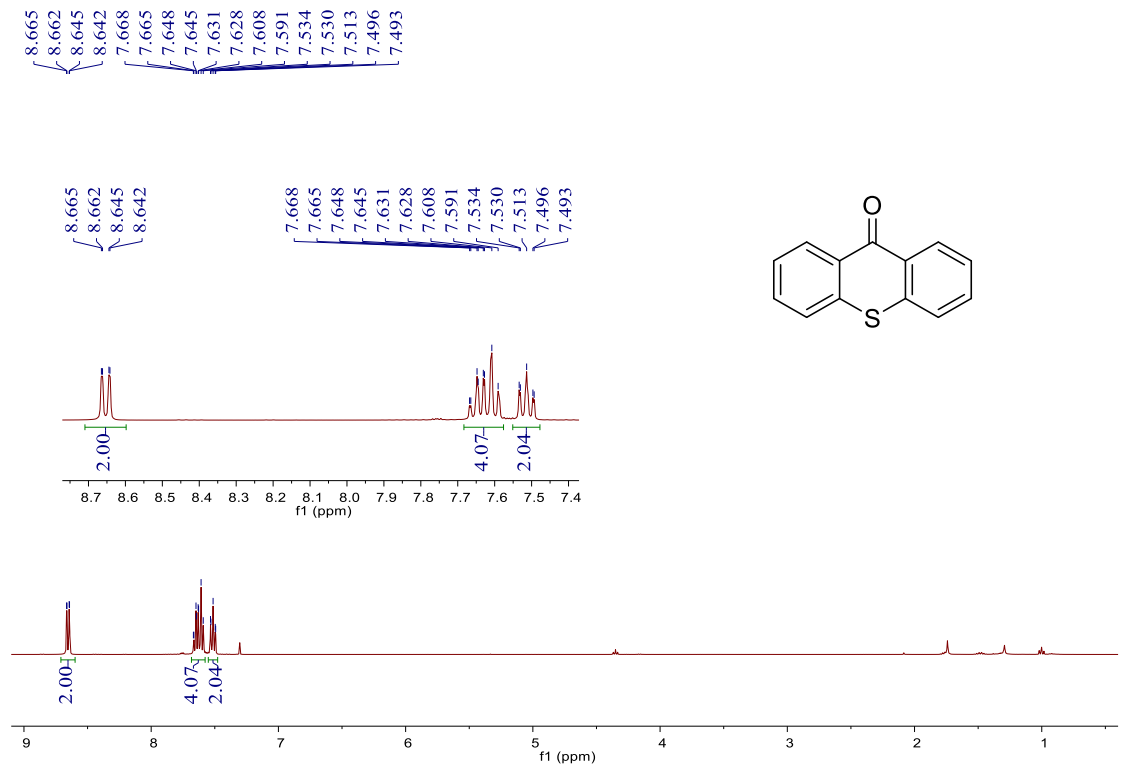

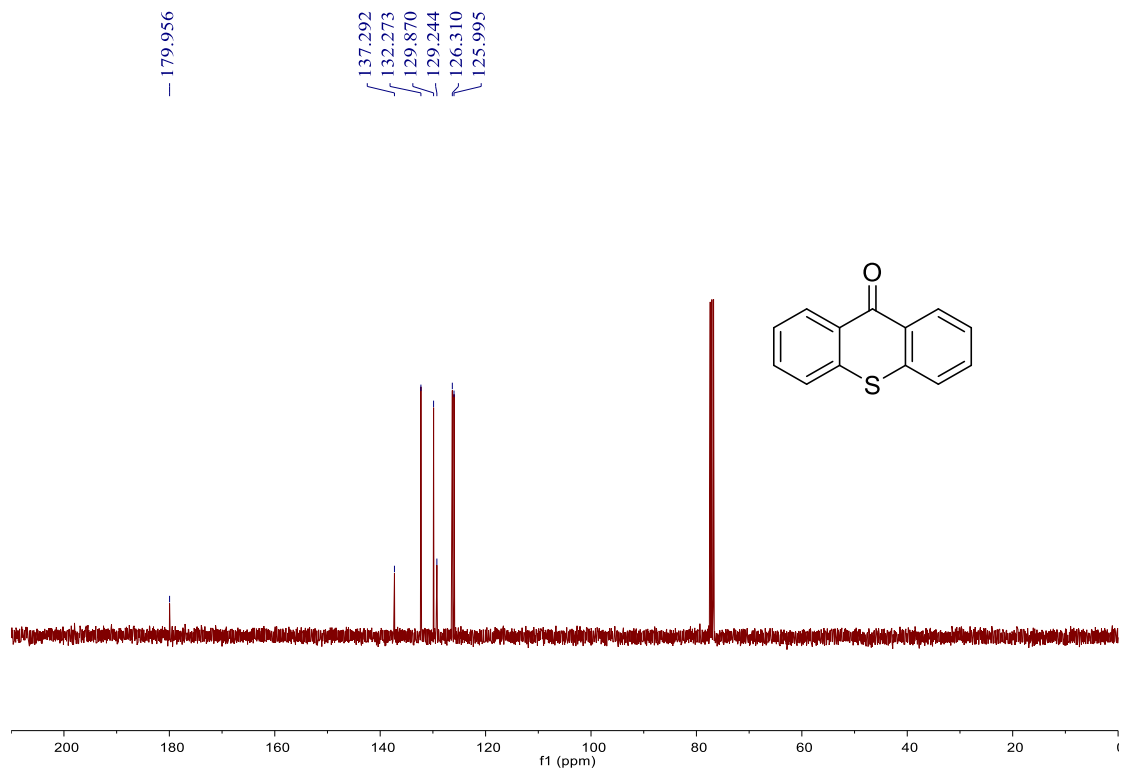

**<sup>1</sup>H & <sup>13</sup>C NMR of 2aa**

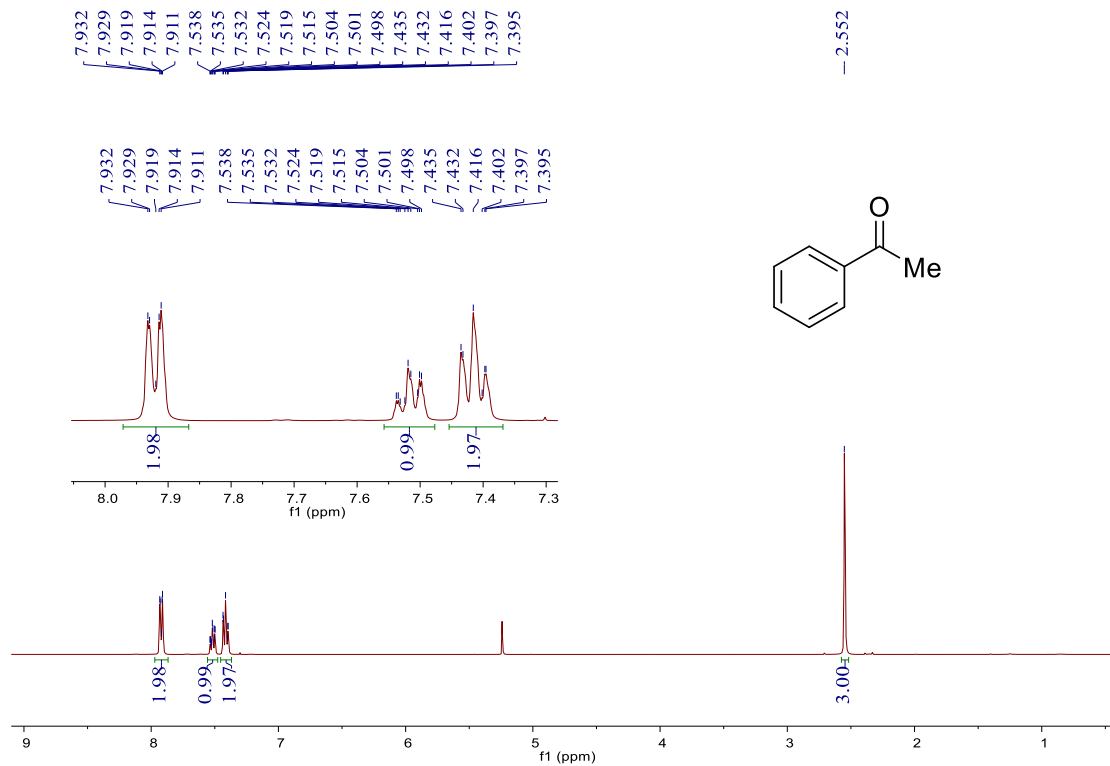

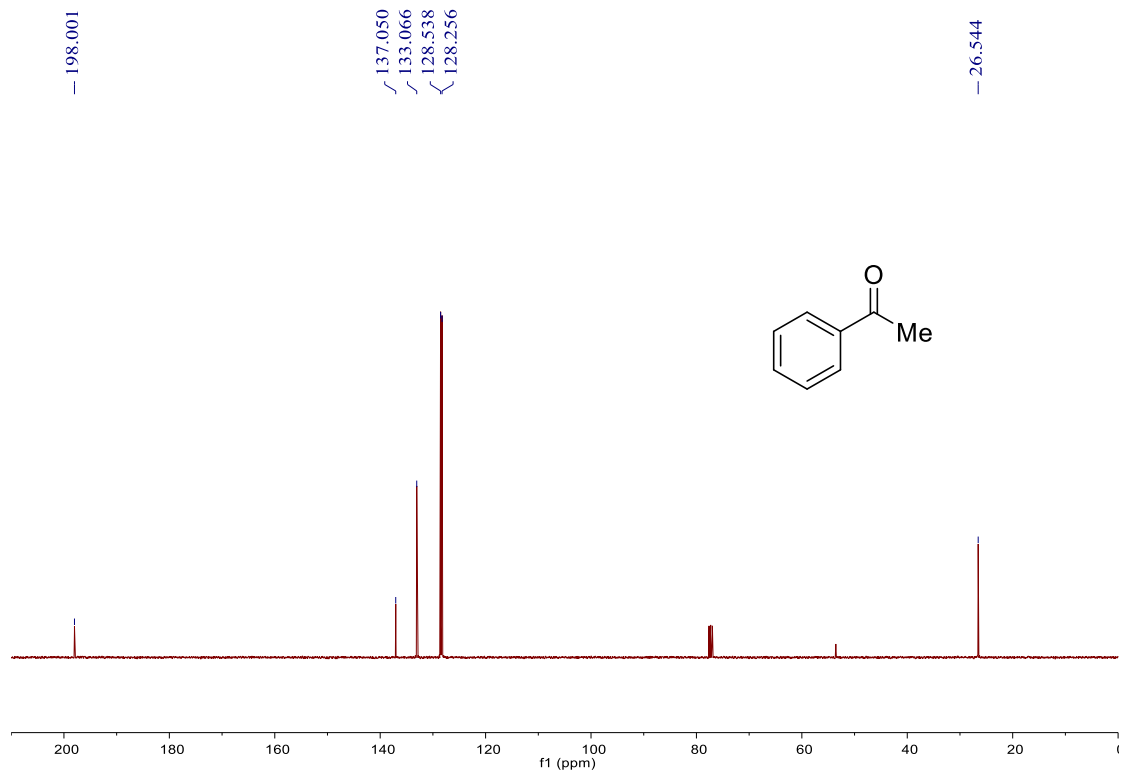

**<sup>1</sup>H & <sup>13</sup>C NMR of 2ab**

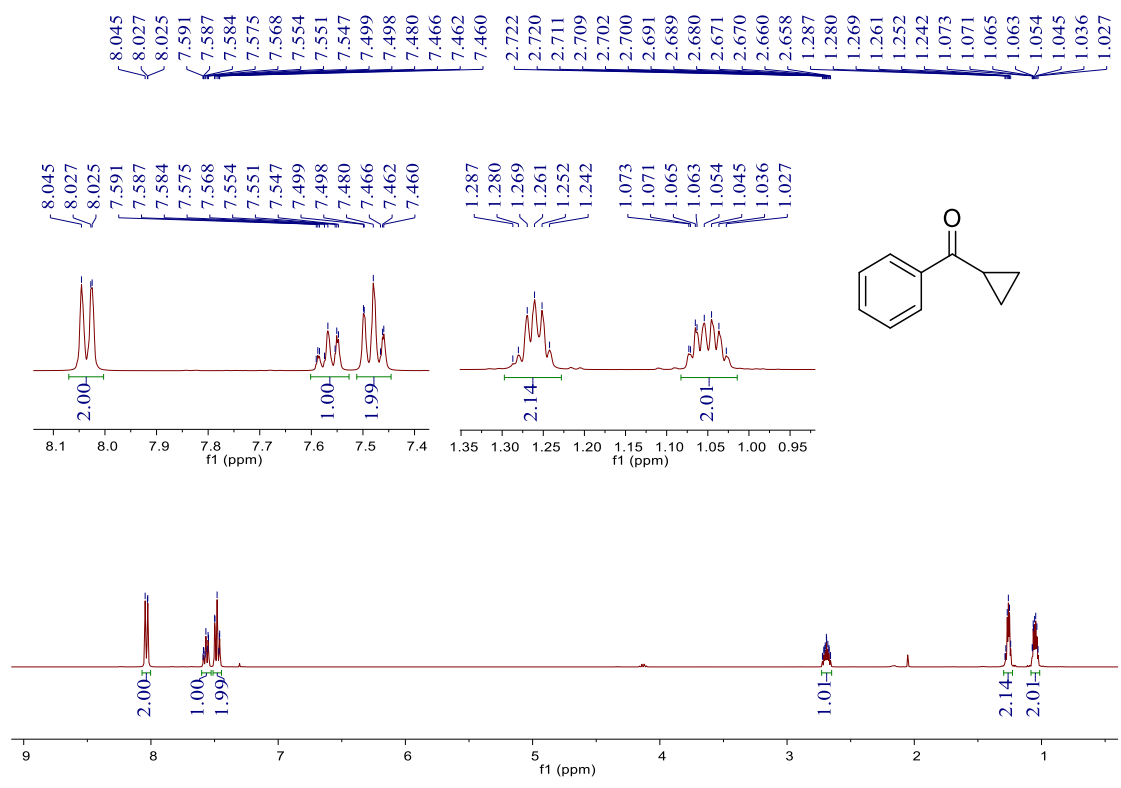



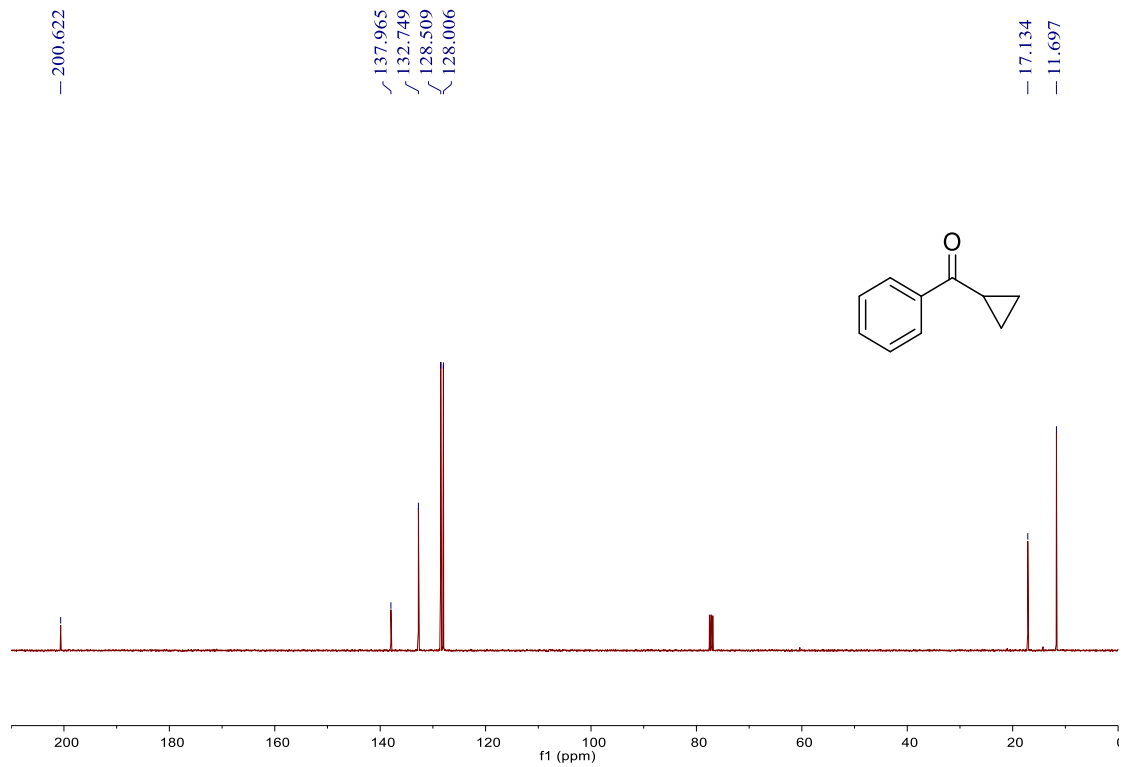

**<sup>1</sup>H & <sup>13</sup>C NMR of 2ac**

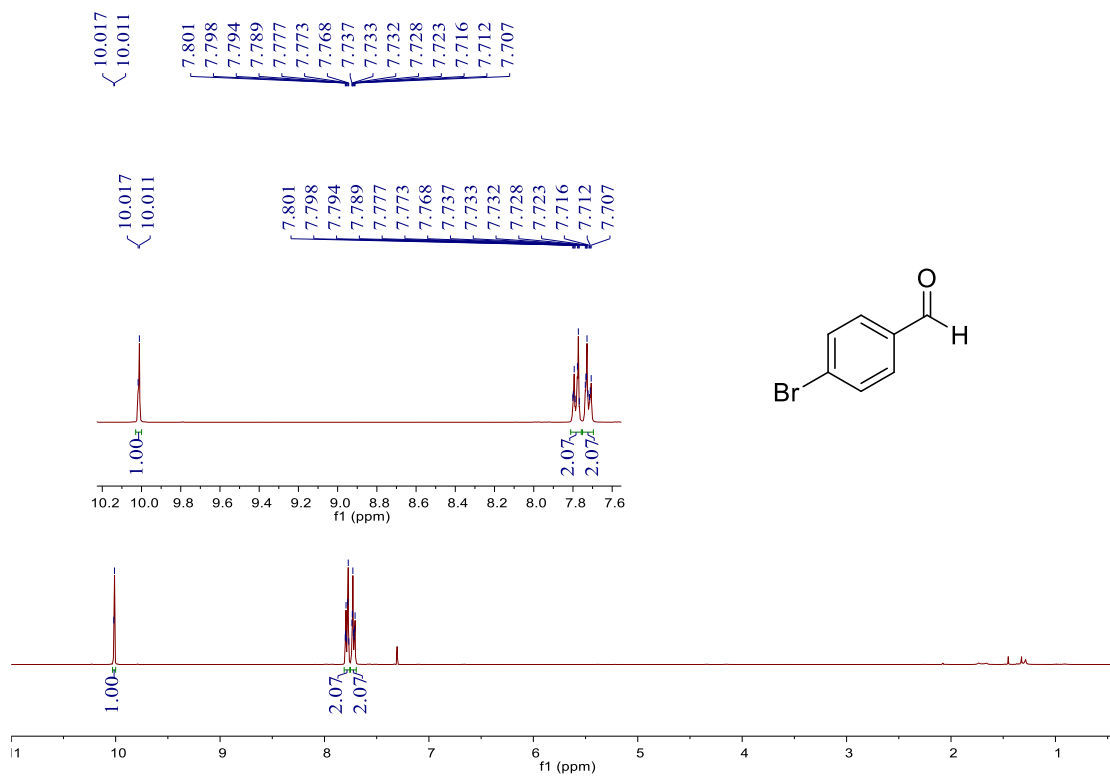

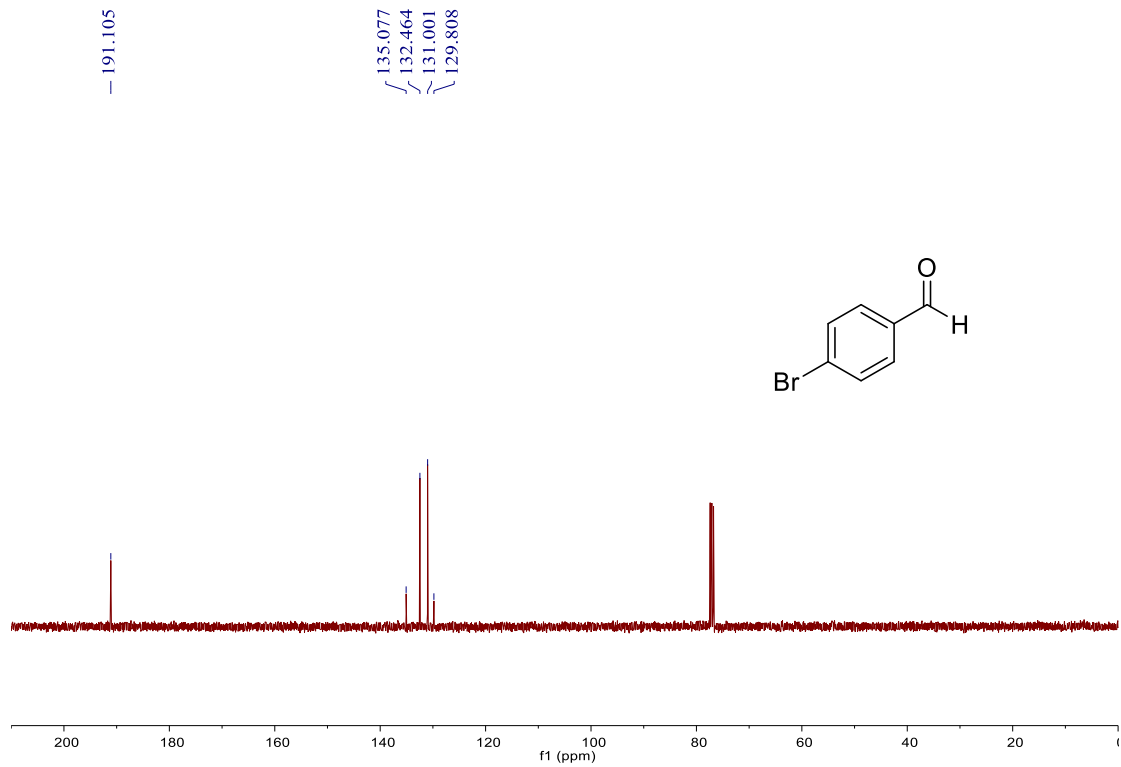

**<sup>1</sup>H & <sup>13</sup>C NMR of 2ad**

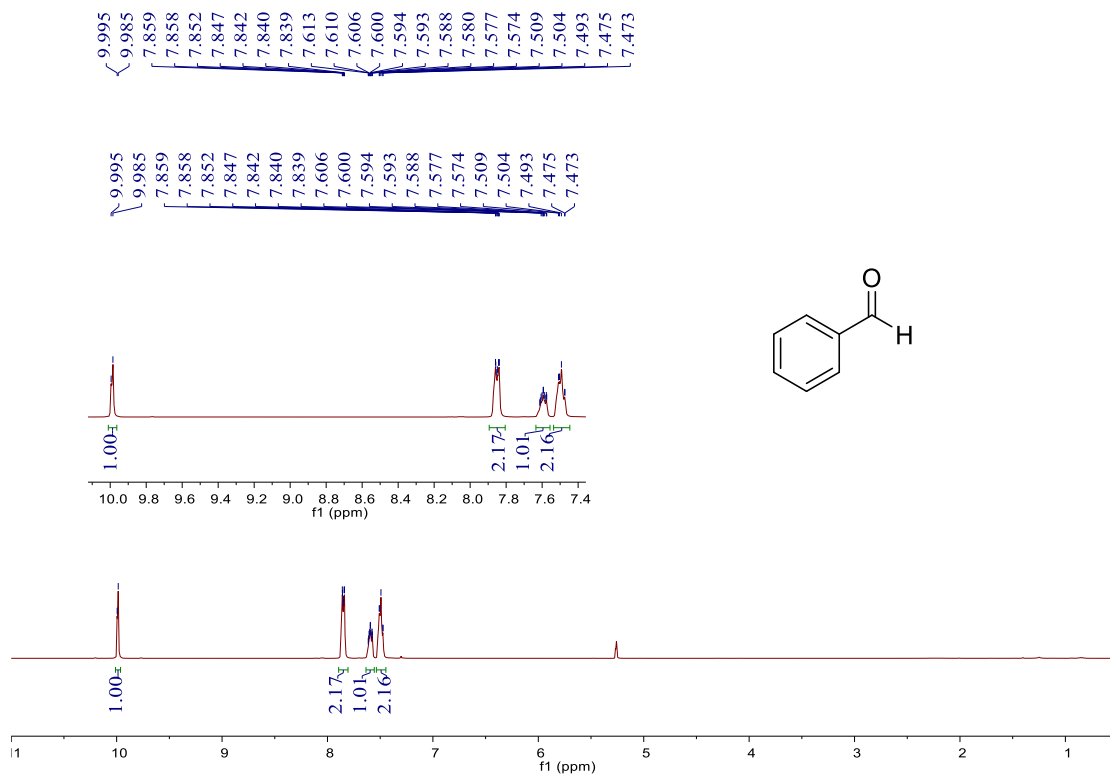

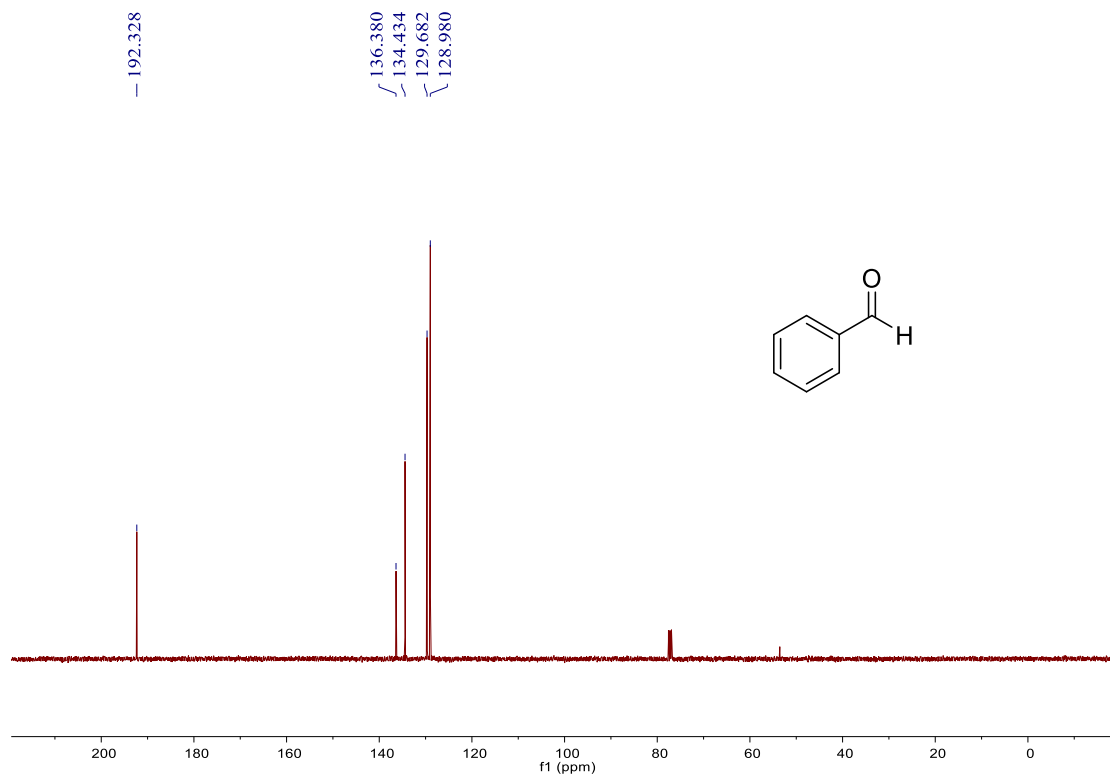

**<sup>1</sup>H & <sup>13</sup>C NMR of 2ae**

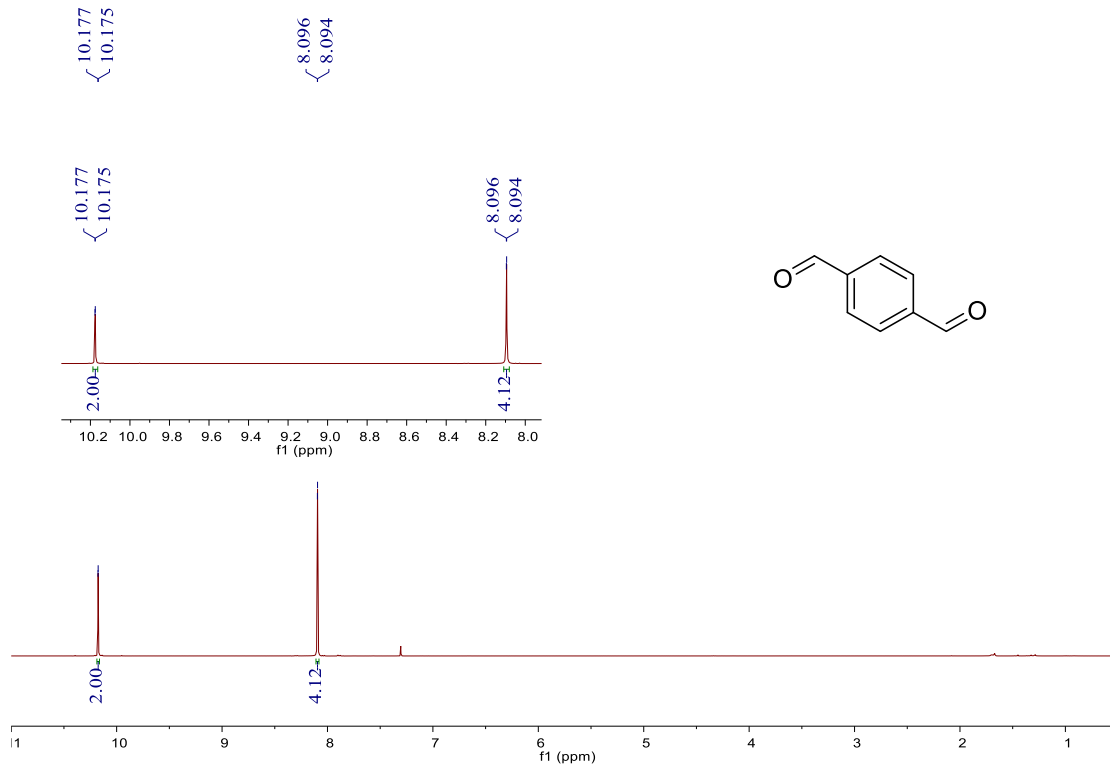

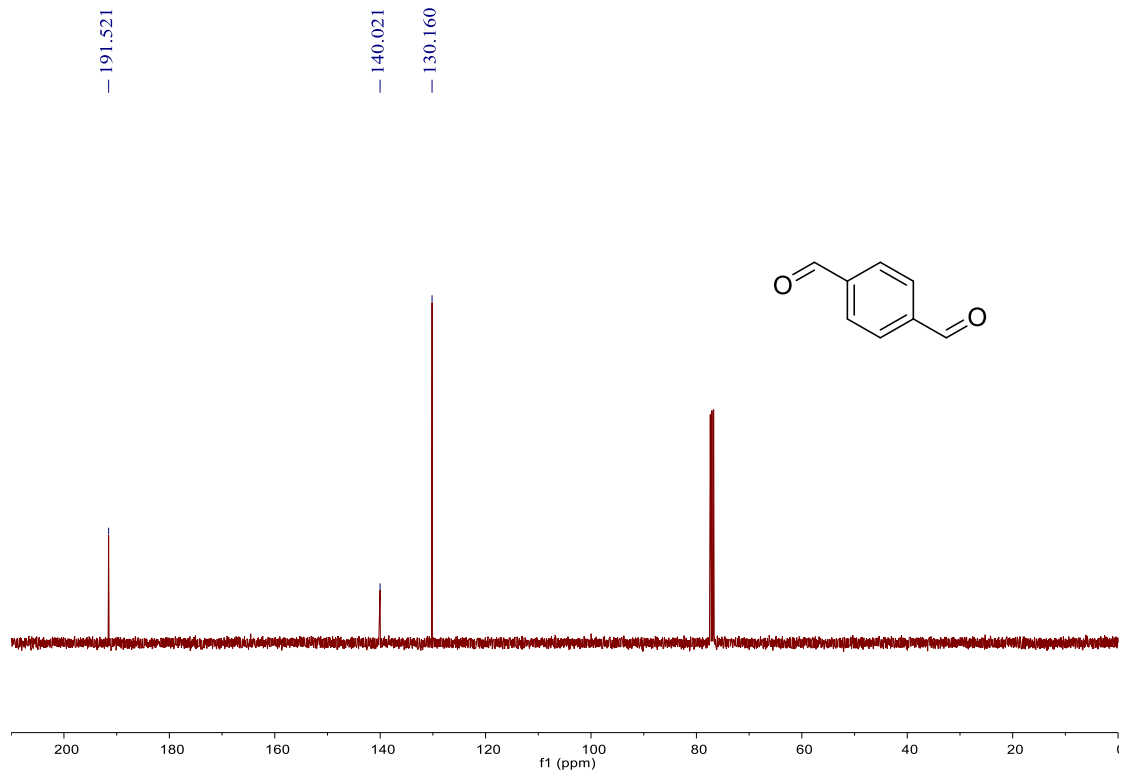

**$^1\text{H}$  &  $^{13}\text{C}$  NMR of 2ae'**

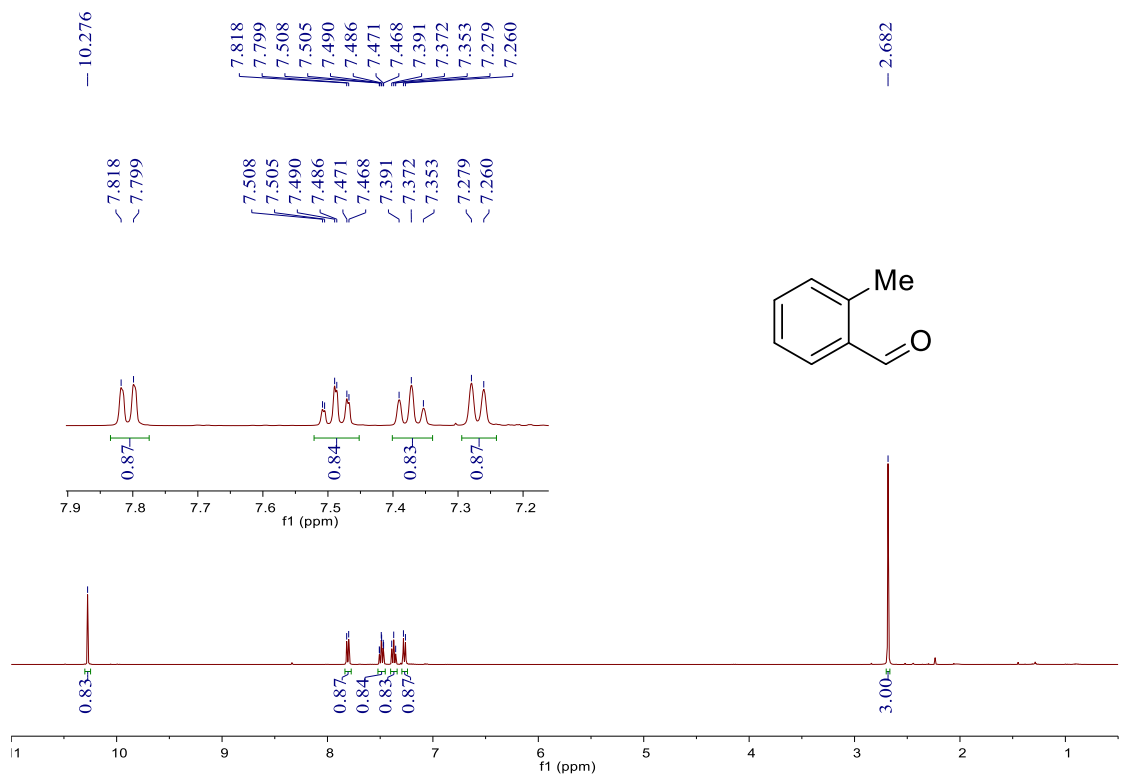

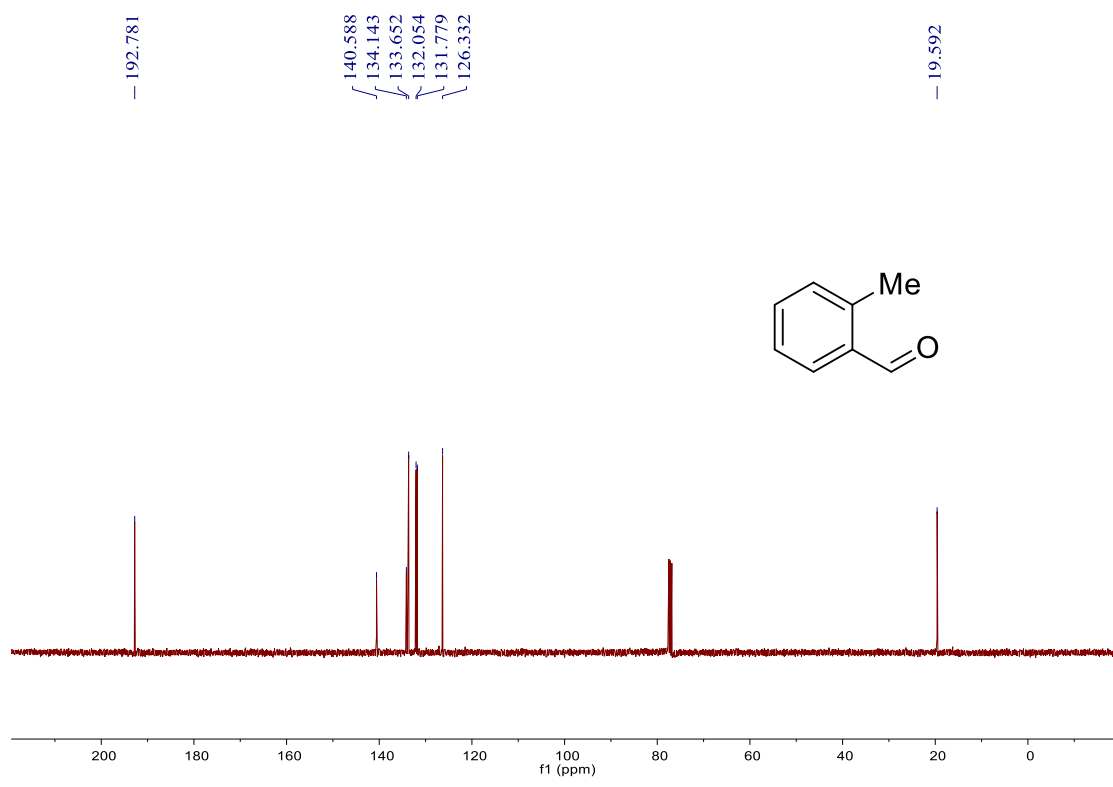

Supplement: d1ra02007b1.pdf [file d1ra02007b1.pdf]
